# Supplementary material for: Genome-Wide Diversity in the Levant Reveals Recent Structuring by Culture
Source: PLoS Genet. 2013 Feb 28;9(2):e1003316. doi: 10.1371/journal.pgen.1003316 (PMC3585000; doi:10.1371/journal.pgen.1003316)
Supplement: Table S3 — Ancestry probabilities of individuals considering 10 ancestral populations. Highlighted cells indicate individuals have >60% of one component. Standard errors were estimated using 200 bootstrap replicates. (XLS) [file pgen.1003316.s009.xls]

## Sheet: Ancestry probabilities
Table S3a: Ancestry probabilities of individuals considering 10 ancestral populations. Highlighted cells indicate individuals have >60% of one component
	Ancestral components
Samples	1	2	3	4	5	6	7	8	9	10
San	0.924655	1e-05	1e-05	1e-05	1e-05	0.041871	1e-05	1e-05	1e-05	0.033404
San	0.915794	1e-05	1e-05	1e-05	1e-05	0.052104	1e-05	1e-05	1e-05	0.032031
San	0.944502	1e-05	1e-05	1e-05	1e-05	0.018975	1e-05	1e-05	1e-05	0.036453
San	0.919784	1e-05	1e-05	1e-05	1e-05	0.034782	1.5e-05	1e-05	1e-05	0.045359
San	0.913756	1e-05	1e-05	1e-05	1e-05	0.048916	1e-05	1e-05	1e-05	0.037258
San	0.915855	1e-05	1e-05	1e-05	1e-05	0.042073	1e-05	1e-05	1e-05	0.042002
Mbuti Pygmy	0.99991	1e-05	1e-05	1e-05	1e-05	1e-05	1e-05	1e-05	1e-05	1e-05
Mbuti Pygmy	0.99991	1e-05	1e-05	1e-05	1e-05	1e-05	1e-05	1e-05	1e-05	1e-05
Mbuti Pygmy	0.99991	1e-05	1e-05	1e-05	1e-05	1e-05	1e-05	1e-05	1e-05	1e-05
Mbuti Pygmy	0.99991	1e-05	1e-05	1e-05	1e-05	1e-05	1e-05	1e-05	1e-05	1e-05
Mbuti Pygmy	0.99991	1e-05	1e-05	1e-05	1e-05	1e-05	1e-05	1e-05	1e-05	1e-05
Mbuti Pygmy	0.99991	1e-05	1e-05	1e-05	1e-05	1e-05	1e-05	1e-05	1e-05	1e-05
Mbuti Pygmy	0.999017	1e-05	1e-05	1e-05	1e-05	0.000903	1e-05	1e-05	1e-05	1e-05
Mbuti Pygmy	0.99991	1e-05	1e-05	1e-05	1e-05	1e-05	1e-05	1e-05	1e-05	1e-05
Mbuti Pygmy	0.99991	1e-05	1e-05	1e-05	1e-05	1e-05	1e-05	1e-05	1e-05	1e-05
Mbuti Pygmy	0.99991	1e-05	1e-05	1e-05	1e-05	1e-05	1e-05	1e-05	1e-05	1e-05
Mbuti Pygmy	0.99991	1e-05	1e-05	1e-05	1e-05	1e-05	1e-05	1e-05	1e-05	1e-05
Mbuti Pygmy	0.99991	1e-05	1e-05	1e-05	1e-05	1e-05	1e-05	1e-05	1e-05	1e-05
Mbuti Pygmy	0.99991	1e-05	1e-05	1e-05	1e-05	1e-05	1e-05	1e-05	1e-05	1e-05
Mbuti Pygmy	0.99991	1e-05	1e-05	1e-05	1e-05	1e-05	1e-05	1e-05	1e-05	1e-05
Mbuti Pygmy	0.99991	1e-05	1e-05	1e-05	1e-05	1e-05	1e-05	1e-05	1e-05	1e-05
Biaka Pygmy	0.699459	1e-05	1e-05	1e-05	1e-05	0.300461	1e-05	1e-05	1e-05	1e-05
Biaka Pygmy	0.656847	1e-05	1e-05	1e-05	1e-05	0.343073	1e-05	1e-05	1e-05	1e-05
Biaka Pygmy	0.669906	1e-05	1e-05	1e-05	1e-05	0.330014	1e-05	1e-05	1e-05	1e-05
Biaka Pygmy	0.658094	2e-05	1e-05	1e-05	1e-05	0.341807	2e-05	1e-05	1e-05	1e-05
Biaka Pygmy	0.702442	1e-05	1e-05	1e-05	1e-05	0.297478	1e-05	1e-05	1e-05	1e-05
Biaka Pygmy	0.71901	1e-05	1e-05	1e-05	1e-05	0.28091	1e-05	1e-05	1e-05	1e-05
Biaka Pygmy	0.644331	1.2e-05	1e-05	1e-05	1.3e-05	0.355582	1.1e-05	1e-05	1e-05	1e-05
Biaka Pygmy	0.712724	1e-05	1e-05	1e-05	1e-05	0.287196	1e-05	1e-05	1e-05	1e-05
Biaka Pygmy	0.653856	1e-05	1e-05	1e-05	1e-05	0.346064	1e-05	1e-05	1e-05	1e-05
Biaka Pygmy	0.723495	1e-05	1.6e-05	1e-05	1e-05	0.276413	1e-05	1.6e-05	1e-05	1e-05
Biaka Pygmy	0.723824	1e-05	1e-05	1e-05	1e-05	0.276096	1e-05	1e-05	1e-05	1e-05
Biaka Pygmy	0.750435	1e-05	1e-05	1e-05	1e-05	0.249485	1e-05	1e-05	1e-05	1e-05
Biaka Pygmy	0.654588	1e-05	1e-05	1e-05	1e-05	0.345332	1e-05	1e-05	1e-05	1e-05
Biaka Pygmy	0.649958	1e-05	1e-05	1.3e-05	1e-05	0.349957	1.1e-05	1.1e-05	1e-05	1e-05
Biaka Pygmy	0.640951	1e-05	1e-05	1e-05	1e-05	0.358969	1e-05	1e-05	1e-05	1e-05
Biaka Pygmy	0.687102	1e-05	1e-05	1e-05	1e-05	0.312818	1e-05	1e-05	1e-05	1e-05
Biaka Pygmy	0.648757	1e-05	1.2e-05	1e-05	1e-05	0.35116	1.1e-05	1e-05	1e-05	1e-05
Biaka Pygmy	0.654637	1e-05	1e-05	1e-05	1e-05	0.345283	1e-05	1e-05	1e-05	1e-05
Biaka Pygmy	0.651006	1e-05	1e-05	1e-05	1e-05	0.348914	1e-05	1e-05	1e-05	1e-05
Biaka Pygmy	0.754996	1e-05	1e-05	1e-05	1e-05	0.244924	1e-05	1e-05	1e-05	1e-05
Biaka Pygmy	0.646161	1e-05	1.5e-05	1e-05	1e-05	0.353754	1e-05	1e-05	1e-05	1e-05
Biaka Pygmy	0.654619	1e-05	1e-05	1e-05	1e-05	0.3453	1e-05	1e-05	1e-05	1e-05
Biaka Pygmy	0.641624	1.2e-05	1e-05	1e-05	1e-05	0.358294	1e-05	1e-05	1e-05	1e-05
Biaka Pygmy	0.640357	1e-05	1e-05	1e-05	1e-05	0.359563	1e-05	1e-05	1e-05	1e-05
Biaka Pygmy	0.641985	1.4e-05	1e-05	1.3e-05	1e-05	0.357925	1.1e-05	1.3e-05	1e-05	1e-05
Bantu	0.125697	1e-05	1e-05	0.000691	1e-05	0.833124	1e-05	1e-05	1e-05	0.040428
Bantu	0.131606	1e-05	1e-05	1e-05	1e-05	0.868314	1e-05	1e-05	1e-05	1e-05
Bantu	0.106886	1e-05	1e-05	1e-05	1e-05	0.811453	1e-05	0.003135	1e-05	0.078466
Bantu	0.127999	1e-05	1e-05	1e-05	1e-05	0.841971	1e-05	0.000172	1e-05	0.029798
Bantu	0.103538	1e-05	1e-05	0.001743	1e-05	0.818214	1e-05	1e-05	1e-05	0.076445
Bantu	0.12126	1e-05	1e-05	1e-05	1e-05	0.845929	1e-05	1e-05	1e-05	0.032741
Bantu	0.126112	1e-05	1e-05	0.003737	1e-05	0.72566	1e-05	0.004805	1e-05	0.139636
Bantu	0.282921	1e-05	1e-05	1e-05	1e-05	0.716999	1e-05	1e-05	1e-05	1e-05
Bantu	0.126578	1e-05	1e-05	1e-05	1e-05	0.729346	1e-05	0.00047	1e-05	0.143546
Bantu	0.263674	1e-05	1e-05	1e-05	1e-05	0.736246	1e-05	1e-05	1e-05	1e-05
Bantu	0.126434	1e-05	1e-05	1e-05	1e-05	0.838593	1e-05	1e-05	1e-05	0.034903
Bantu	0.24649	1e-05	1e-05	1e-05	1e-05	0.749511	1e-05	1e-05	1e-05	0.003928
Bantu	0.171812	1e-05	1e-05	1e-05	1e-05	0.828108	1e-05	1e-05	1e-05	1e-05
Bantu	0.1313	1e-05	1e-05	1e-05	1e-05	0.845379	1e-05	1e-05	1e-05	0.023251
Bantu	0.119159	1e-05	1e-05	1e-05	1e-05	0.851461	1e-05	1e-05	1e-05	0.029311
Bantu	0.206519	1e-05	1e-05	1e-05	1e-05	0.790466	1e-05	1e-05	1e-05	0.002945
Bantu	0.116037	1e-05	1e-05	1e-05	1e-05	0.844937	1e-05	0.001129	1e-05	0.037838
Bantu	0.362656	1e-05	1e-05	1e-05	1e-05	0.637264	1e-05	1e-05	1e-05	1e-05
Bantu	0.139506	1e-05	1e-05	0.003981	1e-05	0.822137	1.2e-05	1e-05	1e-05	0.034314
Bantu	0.160527	1e-05	1e-05	1e-05	1e-05	0.839393	1e-05	1e-05	1e-05	1e-05
Yoruba	0.03588	1e-05	1e-05	1e-05	1e-05	0.96404	1e-05	1e-05	1e-05	1e-05
Yoruba	0.047481	1e-05	1e-05	1e-05	1e-05	0.952439	1e-05	1e-05	1e-05	1e-05
Yoruba	0.043714	1e-05	1e-05	1e-05	1e-05	0.956206	1e-05	1e-05	1e-05	1e-05
Yoruba	0.034887	1e-05	1e-05	1e-05	1e-05	0.965033	1e-05	1e-05	1e-05	1e-05
Yoruba	0.053003	1e-05	1e-05	1e-05	1e-05	0.946917	1e-05	1e-05	1e-05	1e-05
Yoruba	0.035242	1e-05	1e-05	1e-05	1e-05	0.964678	1e-05	1e-05	1e-05	1e-05
Yoruba	0.031802	1e-05	1e-05	1e-05	1e-05	0.968118	1e-05	1e-05	1e-05	1e-05
Yoruba	0.037957	1e-05	1e-05	1e-05	1e-05	0.961963	1e-05	1e-05	1e-05	1e-05
Yoruba	0.032633	1e-05	1e-05	1e-05	1e-05	0.967287	1e-05	1e-05	1e-05	1e-05
Yoruba	0.029159	1e-05	1e-05	1e-05	1e-05	0.970761	1e-05	1e-05	1e-05	1e-05
Yoruba	1e-05	1e-05	1e-05	1e-05	1e-05	0.99991	1e-05	1e-05	1e-05	1e-05
Yoruba	0.044638	1e-05	1e-05	1e-05	1e-05	0.955282	1e-05	1e-05	1e-05	1e-05
Yoruba	0.036584	1e-05	1e-05	1e-05	1e-05	0.963336	1e-05	1e-05	1e-05	1e-05
Yoruba	0.042721	1e-05	1e-05	1e-05	1e-05	0.957199	1e-05	1e-05	1e-05	1e-05
Yoruba	1e-05	1e-05	1e-05	1e-05	1e-05	0.99991	1e-05	1e-05	1e-05	1e-05
Yoruba	0.039102	1e-05	1e-05	1e-05	1e-05	0.960818	1e-05	1e-05	1e-05	1e-05
Yoruba	1e-05	1e-05	1e-05	1e-05	1e-05	0.99991	1e-05	1e-05	1e-05	1e-05
Yoruba	0.046076	1e-05	1e-05	1e-05	1e-05	0.953844	1e-05	1e-05	1e-05	1e-05
Yoruba	1e-05	1e-05	1e-05	1e-05	1e-05	0.99991	1e-05	1e-05	1e-05	1e-05
Yoruba	0.037403	1e-05	1e-05	1e-05	1e-05	0.962517	1e-05	1e-05	1e-05	1e-05
Yoruba	0.050131	1e-05	1e-05	1e-05	1e-05	0.949789	1e-05	1e-05	1e-05	1e-05
Yoruba	0.040156	1e-05	1e-05	1e-05	1e-05	0.959764	1e-05	1e-05	1e-05	1e-05
Yoruba	1e-05	1e-05	1e-05	1e-05	1e-05	0.99991	1e-05	1e-05	1e-05	1e-05
Yoruba	0.040515	1e-05	1e-05	1e-05	1e-05	0.959405	1e-05	1e-05	1e-05	1e-05
Mandenka	1e-05	1e-05	1e-05	0.011346	1e-05	0.988574	1e-05	1e-05	1e-05	1e-05
Mandenka	0.014167	1e-05	1e-05	1e-05	1e-05	0.985753	1e-05	1e-05	1e-05	1e-05
Mandenka	1e-05	1e-05	1e-05	1e-05	1e-05	0.99991	1e-05	1e-05	1e-05	1e-05
Mandenka	1e-05	1e-05	1e-05	1e-05	1e-05	0.99215	1e-05	1e-05	1e-05	0.00777
Mandenka	1e-05	1e-05	1e-05	1e-05	1e-05	0.99991	1e-05	1e-05	1e-05	1e-05
Mandenka	0.026294	1e-05	1e-05	0.002857	1e-05	0.970779	1e-05	1e-05	1e-05	1e-05
Mandenka	1e-05	1e-05	1e-05	0.004657	1e-05	0.995263	1e-05	1e-05	1e-05	1e-05
Mandenka	1e-05	1e-05	1e-05	1e-05	1e-05	0.99991	1e-05	1e-05	1e-05	1e-05
Mandenka	1e-05	1e-05	1e-05	1e-05	1e-05	0.99991	1e-05	1e-05	1e-05	1e-05
Mandenka	0.014878	1e-05	1e-05	0.015011	1e-05	0.970041	1e-05	1e-05	1e-05	1e-05
Mandenka	1e-05	1e-05	1e-05	1e-05	1e-05	0.99991	1e-05	1e-05	1e-05	1e-05
Mandenka	1e-05	1e-05	1e-05	0.011337	1e-05	0.988583	1e-05	1e-05	1e-05	1e-05
Mandenka	0.01277	1e-05	1e-05	0.006947	1e-05	0.980213	1e-05	1e-05	1e-05	1e-05
Mandenka	1e-05	1e-05	1e-05	0.025306	1e-05	0.974614	1e-05	1e-05	1e-05	1e-05
Mandenka	1e-05	1e-05	1e-05	1e-05	1e-05	0.99991	1e-05	1e-05	1e-05	1e-05
Mandenka	1e-05	1e-05	1e-05	1e-05	1e-05	0.99991	1e-05	1e-05	1e-05	1e-05
Mandenka	1e-05	1e-05	1e-05	0.010656	1e-05	0.989264	1e-05	1e-05	1e-05	1e-05
Mandenka	0.002777	1e-05	1e-05	0.04618	1e-05	0.950973	1e-05	1e-05	1e-05	1e-05
Mandenka	1e-05	1e-05	1e-05	1e-05	1e-05	0.99991	1e-05	1e-05	1e-05	1e-05
Mandenka	0.016343	1e-05	1e-05	1e-05	1e-05	0.983577	1e-05	1e-05	1e-05	1e-05
Mandenka	1e-05	1e-05	1e-05	1e-05	1e-05	0.99991	1e-05	1e-05	1e-05	1e-05
Mandenka	0.004056	1e-05	1e-05	1e-05	1e-05	0.995864	1e-05	1e-05	1e-05	1e-05
Mandenka	0.004769	1e-05	1e-05	0.00139	1e-05	0.993772	1e-05	1e-05	1e-05	1e-05
Mandenka	0.001174	1e-05	1e-05	1e-05	1e-05	0.998746	1e-05	1e-05	1e-05	1e-05
Mozabite	1e-05	1e-05	0.004415	0.582744	0.112445	0.03749	1e-05	1e-05	0.149056	0.113809
Mozabite	1e-05	1e-05	1e-05	0.906483	1e-05	1e-05	1e-05	1e-05	0.067909	0.025538
Mozabite	1e-05	0.005664	1e-05	0.94647	1e-05	1e-05	1e-05	1e-05	0.03866	0.009146
Mozabite	0.000813	1e-05	1e-05	0.931871	1e-05	0.027609	1e-05	1e-05	0.018554	0.021104
Mozabite	0.00329	1e-05	1e-05	0.949597	1e-05	1e-05	1e-05	1e-05	0.029519	0.017534
Mozabite	1e-05	1e-05	1e-05	0.99991	1e-05	1e-05	1e-05	1e-05	1e-05	1e-05
Mozabite	1e-05	1e-05	1e-05	0.99991	1e-05	1e-05	1e-05	1e-05	1e-05	1e-05
Mozabite	1e-05	1e-05	1e-05	0.99991	1e-05	1e-05	1e-05	1e-05	1e-05	1e-05
Mozabite	1e-05	1e-05	0.024713	0.938895	1e-05	1e-05	1e-05	1e-05	0.019553	0.016779
Mozabite	1e-05	1e-05	1e-05	0.98716	1e-05	1e-05	1e-05	1e-05	0.01276	1e-05
Mozabite	1e-05	0.015178	0.003191	0.594354	0.18885	0.068614	1e-05	1e-05	0.102725	0.027058
Mozabite	1e-05	1e-05	1e-05	0.99991	1e-05	1e-05	1e-05	1e-05	1e-05	1e-05
Mozabite	1e-05	1e-05	1e-05	0.963734	1e-05	1e-05	1e-05	1e-05	0.036186	1e-05
Mozabite	0.005056	1e-05	0.004657	0.673925	0.053939	0.076735	1e-05	1e-05	0.083218	0.102439
Mozabite	1e-05	1e-05	1e-05	0.99991	1e-05	1e-05	1e-05	1e-05	1e-05	1e-05
Mozabite	1e-05	1e-05	1e-05	0.99991	1e-05	1e-05	1e-05	1e-05	1e-05	1e-05
Mozabite	1e-05	1e-05	1e-05	0.983306	1e-05	0.016614	1e-05	1e-05	1e-05	1e-05
Mozabite	1e-05	1e-05	1e-05	0.99991	1e-05	1e-05	1e-05	1e-05	1e-05	1e-05
Mozabite	1e-05	1e-05	1e-05	0.99991	1e-05	1e-05	1e-05	1e-05	1e-05	1e-05
Mozabite	1e-05	1e-05	1e-05	0.637889	0.068864	0.100191	0.0058	1e-05	0.10585	0.081365
Mozabite	0.022703	1e-05	0.001259	0.343652	0.009936	0.510296	1e-05	1e-05	0.044993	0.067131
Mozabite	0.007087	1e-05	1e-05	0.627919	0.060277	0.076778	1e-05	0.004572	0.070093	0.153244
Mozabite	1e-05	1e-05	1e-05	0.794565	0.004601	0.11141	0.001212	1e-05	0.025339	0.062832
Mozabite	1e-05	1e-05	1e-05	0.994769	1e-05	0.005151	1e-05	1e-05	1e-05	1e-05
Mozabite	1e-05	1e-05	1e-05	0.99991	1e-05	1e-05	1e-05	1e-05	1e-05	1e-05
Moroccan	1e-05	1e-05	1e-05	0.418283	0.114631	0.103818	1e-05	1e-05	0.198565	0.164654
Moroccan	1e-05	1e-05	1e-05	0.46416	0.072873	0.112894	1e-05	1e-05	0.161646	0.188376
Moroccan	0.003138	1e-05	1e-05	0.34891	0.100778	0.094423	1e-05	0.003237	0.184217	0.265267
Moroccan	0.016318	1e-05	1e-05	0.199072	0.075084	0.499321	1e-05	1e-05	0.099166	0.110998
Moroccan	1e-05	1e-05	1e-05	0.492098	0.052884	0.103443	1e-05	1e-05	0.141969	0.209555
Moroccan	1e-05	1e-05	1e-05	0.30573	0.066065	0.337148	1e-05	0.000741	0.144604	0.145672
Moroccan	0.000646	0.007831	1e-05	0.363258	0.096002	0.136922	1e-05	1e-05	0.198011	0.197301
Moroccan	0.007819	1e-05	1e-05	0.318534	0.060136	0.121853	1e-05	0.001001	0.183345	0.307283
Moroccan	1e-05	1e-05	1e-05	0.361382	0.101597	0.231026	1e-05	1e-05	0.157586	0.148359
Moroccan	1e-05	1e-05	1e-05	0.521183	0.092203	0.090957	1e-05	1e-05	0.110106	0.185501
Egyptian	0.013836	1e-05	0.081229	0.102789	1e-05	0.127674	1e-05	0.007871	0.367125	0.299446
Egyptian	0.006769	1e-05	0.086002	0.059815	0.004257	0.106906	0.012796	1e-05	0.413955	0.30948
Egyptian	0.018322	1e-05	0.089774	0.085644	0.017781	0.123596	1e-05	0.010228	0.370998	0.283638
Egyptian	1e-05	0.00933	0.063052	0.106112	1e-05	0.102093	1e-05	0.002318	0.350375	0.366689
Egyptian	0.006343	0.008455	0.094176	0.098284	1e-05	0.133926	1e-05	1e-05	0.351032	0.307754
Egyptian	0.018163	1e-05	0.074039	0.116456	0.003459	0.125593	1e-05	0.011077	0.354875	0.296318
Egyptian	0.007606	1e-05	0.04642	0.076178	1e-05	0.071085	1e-05	0.006049	0.230448	0.562184
Egyptian	0.03131	1e-05	0.04807	0.118487	1e-05	0.209861	1e-05	0.016729	0.211689	0.363824
Egyptian	0.009314	1e-05	0.089073	0.085015	0.006657	0.081101	1e-05	1e-05	0.41613	0.31268
Egyptian	0.007312	1e-05	0.072389	0.098225	0.020948	0.099474	1e-05	1e-05	0.375788	0.325833
Egyptian	0.009663	0.006057	0.072038	0.136036	0.010032	0.108711	2.5e-05	1e-05	0.341869	0.315559
Egyptian	0.012454	0.004556	0.064946	0.084371	0.045401	0.106787	0.002502	1e-05	0.352007	0.326965
Ethiopian	0.11543	1e-05	1e-05	0.079711	1e-05	0.412728	1e-05	0.006126	1e-05	0.385955
Ethiopian	0.075003	1e-05	1e-05	0.109118	1e-05	0.397244	1e-05	1e-05	1e-05	0.418575
Ethiopian	0.097851	1e-05	1e-05	0.092288	1e-05	0.407251	1e-05	0.007276	1e-05	0.395283
Ethiopian	0.10316	1e-05	1e-05	0.091588	1e-05	0.41269	1e-05	1e-05	1e-05	0.392502
Ethiopian	0.12019	1e-05	1e-05	0.071825	1e-05	0.417155	1e-05	0.009054	1e-05	0.381725
Ethiopian	0.101488	1e-05	1e-05	0.086255	1e-05	0.443484	1e-05	0.006115	1e-05	0.362608
Ethiopian	0.052794	1e-05	1e-05	0.134059	1e-05	0.272583	1e-05	0.009437	0.01198	0.519107
Ethiopian	0.060246	1e-05	1e-05	0.115962	1e-05	0.293033	1e-05	0.007128	1e-05	0.523581
Ethiopian	0.076765	1e-05	1e-05	0.126305	1e-05	0.30415	0.008517	1e-05	0.006093	0.47813
Ethiopian	0.056577	1e-05	1e-05	0.12384	1e-05	0.2714	1e-05	0.005088	0.012561	0.530494
Ethiopian	0.06454	1e-05	1e-05	0.134661	1e-05	0.276216	1e-05	0.009875	0.012154	0.502514
Ethiopian	0.070397	1e-05	1e-05	0.143796	1e-05	0.268891	1e-05	0.010628	0.004624	0.501624
Ethiopian	0.068761	1e-05	1e-05	0.136719	1e-05	0.267927	1e-05	0.005362	0.008195	0.512997
Ethiopian	0.053514	1e-05	1e-05	0.118456	1e-05	0.286847	1e-05	0.00855	0.020709	0.511884
Ethiopian	0.060659	1e-05	1e-05	0.115624	1e-05	0.278407	1e-05	1e-05	1e-05	0.545251
Ethiopian	0.060642	1e-05	1e-05	0.121508	1e-05	0.289411	0.00137	0.007829	0.01809	0.501121
Ethiopian	0.061319	1e-05	1e-05	0.109976	1e-05	0.283202	1e-05	0.001314	0.03975	0.5044
Ethiopian	0.10915	1e-05	1e-05	0.086929	1e-05	0.326431	1e-05	0.010955	1e-05	0.466485
Ethiopian	0.046716	1e-05	1e-05	0.10601	1e-05	0.219351	1e-05	0.00657	0.079768	0.541545
Yemeni	0.067604	1e-05	0.044876	0.020448	0.006508	0.456811	0.000344	0.055351	0.077128	0.27092
Yemeni	0.019987	0.003869	0.175999	0.000495	1e-05	0.152366	0.002159	0.0245	0.165175	0.455441
Yemeni	0.023256	1e-05	1e-05	1e-05	1e-05	0.248599	1e-05	1e-05	1e-05	0.728076
Yemeni	0.020384	0.00562	0.140456	0.048197	0.001822	0.111021	0.005928	0.002464	0.304801	0.359306
Yemeni	0.019054	0.009004	0.122295	0.044924	1e-05	0.093772	0.011718	0.005198	0.250388	0.443636
Yemeni	0.023456	1e-05	1e-05	1e-05	1e-05	0.249055	1e-05	1e-05	1e-05	0.72742
Yemeni	0.021526	0.007316	0.169472	1e-05	0.007509	0.137577	0.007202	0.010014	0.185523	0.453852
Yemeni	0.014478	0.018625	0.209551	0.023119	1e-05	0.090242	0.006848	0.009311	0.282535	0.345281
Yemeni	0.004383	0.015078	0.197365	0.006226	0.015947	0.051382	0.007389	1e-05	0.344371	0.357849
Yemeni	0.009184	1e-05	0.088767	0.0193	1e-05	0.024482	1e-05	1e-05	0.31351	0.544717
Saudi	1e-05	0.00396	0.018544	1e-05	1e-05	1e-05	1e-05	1e-05	0.174402	0.803034
Saudi	0.047207	0.021198	0.169424	0.020181	1e-05	0.311897	0.016718	0.00055	0.124042	0.288773
Saudi	1e-05	1e-05	0.134628	0.014935	0.008196	0.025678	1e-05	1e-05	0.30306	0.513463
Saudi	1e-05	1e-05	0.033775	1e-05	1e-05	1e-05	1e-05	1e-05	0.285567	0.680588
Saudi	1e-05	1e-05	1e-05	1e-05	1e-05	1e-05	1e-05	1e-05	0.129088	0.870832
Saudi	1e-05	0.000988	0.151263	0.005657	0.006182	0.018859	0.004893	1e-05	0.334505	0.477632
Saudi	0.007565	0.025078	0.170886	0.036917	0.041727	0.008158	1e-05	1e-05	0.500578	0.20907
Saudi	0.007051	0.008483	0.018313	0.012417	1e-05	1e-05	1e-05	1e-05	0.186802	0.766894
Saudi	0.009446	0.01503	0.190898	1e-05	1e-05	0.01274	1e-05	1e-05	0.38485	0.386997
Saudi	0.002163	0.022313	0.064401	1e-05	1e-05	1e-05	1e-05	1e-05	0.269191	0.641882
Saudi	0.006128	0.016138	0.236515	0.024802	0.001009	0.030212	0.009269	1e-05	0.340993	0.334925
Saudi	1e-05	1e-05	0.005705	1e-05	1e-05	1e-05	1e-05	1e-05	0.231603	0.762623
Saudi	1e-05	0.000728	1e-05	1e-05	1e-05	1e-05	1e-05	1e-05	0.161063	0.838139
Saudi	1e-05	1e-05	1e-05	1e-05	1e-05	1e-05	1e-05	1e-05	0.151946	0.847974
Saudi	1e-05	1e-05	1e-05	1e-05	1.2e-05	1e-05	1e-05	1e-05	0.149349	0.850568
Saudi	0.015586	0.002971	0.151799	0.041155	1e-05	0.03001	0.00094	0.003563	0.31007	0.443897
Saudi	1e-05	0.005606	0.115537	1e-05	1e-05	1e-05	1e-05	1e-05	0.226184	0.652613
Saudi	1e-05	9.4e-05	1e-05	1e-05	1e-05	1e-05	1e-05	1e-05	0.19532	0.804517
Saudi	0.006001	0.02107	0.279323	1e-05	0.020921	0.050632	0.013401	0.019502	0.331618	0.257522
Saudi	1e-05	1e-05	1e-05	1e-05	1e-05	1e-05	1e-05	1e-05	0.14146	0.85846
Bedouin	0.005986	0.001118	0.0902	0.096067	0.028762	0.114779	0.011364	1e-05	0.355347	0.296366
Bedouin	1e-05	1e-05	1e-05	1e-05	1e-05	1e-05	1e-05	1e-05	1e-05	0.99991
Bedouin	1e-05	1e-05	0.121112	0.061675	0.034668	0.100514	0.006681	1e-05	0.361756	0.313564
Bedouin	0.002631	0.003774	0.152956	0.072641	0.025588	0.073905	1e-05	1e-05	0.403208	0.265276
Bedouin	1e-05	1e-05	1e-05	1e-05	1e-05	1e-05	1e-05	1e-05	1e-05	0.99991
Bedouin	0.001211	1e-05	1e-05	1e-05	1e-05	1e-05	1e-05	1e-05	0.124937	0.873783
Bedouin	1e-05	0.018231	0.101937	0.052215	0.007346	0.076888	0.005662	1e-05	0.404071	0.33363
Bedouin	0.013095	1e-05	0.065518	0.099513	1e-05	0.116067	1e-05	1e-05	0.378016	0.327751
Bedouin	0.006521	0.01423	0.18259	0.063229	0.014599	0.039264	1e-05	0.007403	0.390814	0.28134
Bedouin	1e-05	1e-05	0.020863	1e-05	1e-05	1e-05	1e-05	1e-05	0.124736	0.854331
Bedouin	0.001907	0.009701	0.114745	0.038386	0.019552	0.049041	1e-05	0.007977	0.380238	0.378443
Bedouin	1e-05	1e-05	0.144388	0.021627	0.020171	0.059312	1e-05	0.000314	0.38473	0.369428
Bedouin	1e-05	0.026324	0.141356	0.043494	0.01767	0.039157	0.00706	1e-05	0.342297	0.382622
Bedouin	0.014815	0.007558	0.121311	0.043806	0.012747	0.054052	0.007859	0.000362	0.407298	0.330192
Bedouin	1e-05	1e-05	1e-05	1e-05	1e-05	1e-05	1e-05	1e-05	0.066073	0.933847
Bedouin	1e-05	0.019821	0.134516	0.03157	0.006043	0.033136	0.006242	1e-05	0.365469	0.403183
Bedouin	1e-05	0.007844	1e-05	1e-05	0.002042	0.063392	1e-05	1e-05	1e-05	0.926663
Bedouin	0.013127	1e-05	0.086817	0.095203	0.031138	0.081855	1e-05	1e-05	0.339536	0.352293
Bedouin	1e-05	1e-05	1e-05	1e-05	1e-05	1e-05	1e-05	1.5e-05	1e-05	0.999905
Bedouin	1e-05	1e-05	1e-05	1e-05	1e-05	1e-05	1e-05	1e-05	1e-05	0.99991
Bedouin	1e-05	0.015406	0.142535	0.021949	0.041549	0.053805	0.00299	1e-05	0.343197	0.37855
Bedouin	0.004774	1e-05	0.066234	0.053133	0.037794	0.022778	1e-05	1e-05	0.257001	0.558257
Bedouin	1e-05	1e-05	1e-05	1e-05	0.009833	1e-05	1e-05	1e-05	0.018382	0.971715
Bedouin	0.007335	0.007885	0.082321	0.031775	0.013043	0.060601	1e-05	0.00013	0.416219	0.380681
Bedouin	0.010456	1e-05	0.144839	0.074729	0.02956	0.046281	0.000312	1e-05	0.35533	0.338474
Palestinian	1.8e-05	0.003003	0.148802	0.037472	0.012615	0.033463	0.002446	1e-05	0.488444	0.273728
Palestinian	1e-05	0.019138	0.154056	0.044522	1e-05	0.022209	1e-05	1e-05	0.478065	0.281969
Palestinian	1e-05	1e-05	0.151648	0.047849	0.025458	0.022214	1e-05	1e-05	0.434598	0.318194
Palestinian	3.2e-05	0.009097	0.138113	0.035769	0.011028	0.050336	1e-05	0.001813	0.460735	0.293067
Palestinian	1e-05	0.008309	0.151159	0.022336	0.041819	0.056193	1e-05	0.006983	0.451891	0.261289
Palestinian	1e-05	0.012378	0.159088	0.048492	0.020989	0.033595	1e-05	0.005091	0.436559	0.283788
Palestinian	1e-05	0.01548	0.168649	0.052052	0.017805	0.037827	1e-05	0.004354	0.473824	0.229988
Palestinian	0.0002	0.005557	0.136363	0.039676	0.041569	0.051036	0.001373	1e-05	0.470732	0.253482
Palestinian	1e-05	0.019789	0.150508	0.05092	0.02455	0.025939	1e-05	1e-05	0.45906	0.269204
Palestinian	0.000712	0.021531	0.107885	0.014793	0.033692	0.03577	0.002268	0.000667	0.42954	0.35314
Palestinian	0.00102	0.008397	0.16079	0.019213	0.0067	0.042745	1e-05	1e-05	0.506108	0.255008
Palestinian	0.000581	0.000549	0.154023	0.031342	0.016937	0.040722	1e-05	1e-05	0.486065	0.269759
Palestinian	0.005563	1e-05	0.184979	0.032626	0.006335	0.029604	1e-05	1e-05	0.445961	0.294901
Palestinian	1e-05	0.017442	0.13992	0.046836	0.014712	0.031233	1e-05	0.003009	0.450957	0.295871
Palestinian	0.005975	0.02849	0.140989	0.019641	0.008996	0.01867	1.3e-05	1e-05	0.466866	0.31035
Palestinian	0.001125	0.022708	0.131922	0.048217	0.055254	0.049381	1e-05	1e-05	0.402317	0.289055
Palestinian	0.001518	0.010563	0.153034	0.073881	0.015172	0.058728	9e-05	1e-05	0.331785	0.355221
Palestinian	0.022063	0.002727	0.132117	0.047902	0.007178	0.1316	0.00684	1e-05	0.409641	0.239922
Palestinian	0.00328	1e-05	0.147795	0.048034	0.02466	0.034334	1e-05	0.004349	0.436018	0.30151
Palestinian	0.002772	0.031899	0.116378	0.0287	0.002146	0.026163	1e-05	1e-05	0.434767	0.357156
Palestinian	0.001287	0.016475	0.139346	0.029776	0.019461	0.05023	0.009482	0.004493	0.424202	0.305248
Palestinian	0.005027	0.032359	0.123658	0.014286	0.00419	0.032568	1e-05	1.5e-05	0.475046	0.312841
Palestinian	0.011484	0.020924	0.132137	0.00654	0.016167	0.032219	1e-05	0.003892	0.469073	0.307556
Palestinian	0.01194	0.029228	0.120356	0.020534	1e-05	0.024685	1e-05	1e-05	0.485174	0.308052
Palestinian	0.005176	0.000716	0.152084	0.034364	0.038256	0.029341	0.002492	0.006777	0.441502	0.289291
Jordanian	0.054885	1e-05	0.06377	0.063999	0.005643	0.427863	1e-05	1e-05	0.088179	0.295631
Jordanian	0.007052	1e-05	0.155769	0.043483	0.0131	0.027644	0.01345	4.6e-05	0.477518	0.261928
Jordanian	1e-05	0.017895	0.126007	0.055727	0.059686	0.039726	1e-05	0.006856	0.403459	0.290624
Jordanian	0.004542	0.015992	0.16257	0.040305	0.038654	0.035875	0.005328	0.000843	0.435917	0.259974
Jordanian	0.003899	1e-05	0.150675	0.053793	0.03401	0.031372	0.003255	1e-05	0.463861	0.259115
Jordanian	0.002071	0.009235	0.183823	0.039599	0.046702	0.029424	0.011267	1e-05	0.434124	0.243745
Jordanian	0.001198	0.026738	0.227135	0.034464	0.026872	0.037887	0.025932	0.0075	0.412911	0.199362
Jordanian	0.003735	0.008478	0.17957	0.040235	0.01828	0.055023	0.003565	1e-05	0.440769	0.250335
Jordanian	1e-05	0.005581	0.180048	0.037859	0.016832	0.038607	1e-05	1e-05	0.414435	0.306608
Jordanian	0.000431	0.001547	0.147581	0.045237	0.031391	0.035542	1e-05	0.00425	0.499386	0.234625
Jordanian	0.001714	0.01059	0.171812	0.037575	0.012981	0.019732	0.001533	1e-05	0.404089	0.339966
Jordanian	0.004941	1e-05	0.171823	0.053139	0.007242	0.060088	0.004462	1e-05	0.427992	0.270293
Jordanian	0.008107	1e-05	0.150298	0.054133	0.026896	0.02831	1e-05	0.01115	0.469617	0.25147
Jordanian	0.005656	1e-05	0.16072	0.044756	0.040899	0.039049	0.0146	1e-05	0.460333	0.233967
Jordanian	0.010279	0.015823	0.159329	0.013379	0.039784	0.043085	1e-05	0.011449	0.456954	0.249908
Jordanian	0.00353	1e-05	0.156739	0.054329	0.041028	0.040675	1e-05	0.005568	0.429372	0.268739
Jordanian	0.00545	0.009444	0.156791	0.077961	0.004613	0.059751	1e-05	0.004876	0.437178	0.243927
Jordanian	0.004212	0.008427	0.16722	0.03523	0.017184	0.057392	1e-05	0.000386	0.449581	0.260358
Jordanian	0.001181	0.013218	0.151074	0.056371	0.012037	0.038321	1e-05	0.011988	0.437804	0.277997
Jordanian	0.009866	0.014101	0.176312	0.047452	0.019808	0.025102	0.001984	0.001163	0.454407	0.249806
Syrian	1e-05	0.005722	0.291525	1e-05	0.089756	0.013254	0.024734	0.008601	0.485842	0.080547
Syrian	0.010504	0.00021	0.187222	0.040674	0.066786	0.007554	0.006282	1e-05	0.423017	0.257741
Syrian	0.008416	0.011326	0.17361	0.026129	0.042521	0.021148	1e-05	1e-05	0.435483	0.281347
Syrian	1e-05	1e-05	0.209002	0.036633	0.041264	0.01043	1e-05	1e-05	0.448672	0.253958
Syrian	1e-05	0.008747	0.267961	1e-05	0.02125	0.016298	1e-05	0.013945	0.432518	0.23925
Syrian	0.012706	0.025123	0.206377	0.000478	0.010994	0.045493	0.008693	0.004569	0.377889	0.307677
Syrian	0.005409	0.019476	0.229179	1e-05	0.000707	0.042952	0.008575	1e-05	0.370594	0.323088
Syrian	1.2e-05	0.019491	0.214295	0.007864	1e-05	0.045563	0.004476	0.007933	0.461621	0.238736
Syrian	1e-05	0.014644	0.186181	0.010301	0.060726	0.004435	0.008098	1e-05	0.495591	0.220003
Syrian	1e-05	0.018899	0.192349	0.004173	0.06035	0.024681	0.013797	0.005487	0.509544	0.17071
Syrian	0.001972	0.029895	0.189282	0.017942	0.048572	0.01237	1e-05	1e-05	0.511613	0.188333
Syrian	0.004547	0.011862	0.199427	1e-05	0.013871	0.039482	0.000175	0.01894	0.387946	0.323738
Syrian	0.004834	0.023391	0.123513	0.064834	0.046162	0.051483	1e-05	0.003296	0.453983	0.228495
Syrian	0.010305	1e-05	0.228541	0.004485	1e-05	0.064425	0.016636	1e-05	0.36382	0.311758
Syrian	1e-05	0.014673	0.267796	1e-05	0.023942	1e-05	1e-05	1e-05	0.602235	0.091304
Syrian	1e-05	0.006928	0.214459	0.033561	0.066598	0.031712	0.011205	0.004138	0.45625	0.175138
Lebanese Muslim	0.003549	0.003776	0.202712	0.0398	0.067785	0.016776	0.003606	1e-05	0.498795	0.163191
Lebanese Muslim	0.001281	0.007085	0.223353	0.020314	0.017598	0.017583	1e-05	0.011206	0.520644	0.180925
Lebanese Muslim	0.003807	0.007084	0.216959	0.014712	0.027352	0.020701	1e-05	1e-05	0.507542	0.201823
Lebanese Muslim	0.013293	0.009313	0.215459	0.015895	0.09839	0.003928	1e-05	0.010681	0.459481	0.173551
Lebanese Muslim	1.3e-05	0.001364	0.183433	0.015269	0.066525	0.007994	0.012223	1e-05	0.524249	0.188922
Lebanese Muslim	1e-05	0.004639	0.185666	0.006398	0.046421	0.022709	0.007194	0.004129	0.524287	0.198547
Lebanese Muslim	0.004752	0.026252	0.192847	0.028095	0.039498	0.015745	1e-05	0.001418	0.493033	0.19835
Lebanese Muslim	0.004836	0.013474	0.184841	0.018887	0.067845	1e-05	0.005386	1e-05	0.546537	0.158174
Lebanese Muslim	0.003971	0.019563	0.183894	0.030777	0.052767	0.004815	0.014145	1e-05	0.500103	0.189954
Lebanese Muslim	1e-05	0.008571	0.213476	0.035252	0.025984	0.020022	1e-05	1e-05	0.502289	0.194376
Lebanese Muslim	0.005828	0.020477	0.193755	0.0237	0.048426	0.009775	1e-05	1e-05	0.514513	0.183506
Lebanese Muslim	1e-05	0.02118	0.190823	0.043792	0.048664	0.021458	0.005831	1e-05	0.482009	0.186223
Lebanese Muslim	1e-05	0.001332	0.208002	0.041397	0.042366	0.025431	0.008736	1e-05	0.482931	0.189784
Lebanese Muslim	0.002392	1e-05	0.184093	0.044453	0.03445	0.009423	0.011754	1e-05	0.473095	0.240319
Lebanese Muslim	1e-05	0.004384	0.215334	0.020055	0.025449	0.016247	0.014555	1e-05	0.530252	0.173704
Lebanese Muslim	0.008425	0.006325	0.189525	0.006145	0.056702	0.014811	0.009155	1e-05	0.519153	0.189749
Lebanese Muslim	1e-05	0.029115	0.188718	0.038088	0.028746	0.013233	0.000309	0.005794	0.516323	0.179666
Lebanese Muslim	0.010504	0.022454	0.177358	0.043557	0.057321	0.017205	0.003432	1e-05	0.477797	0.190362
Lebanese Muslim	0.002144	0.012081	0.195822	0.033734	0.053067	1e-05	1e-05	0.001755	0.538513	0.162864
Lebanese Muslim	1e-05	1e-05	0.218961	0.010567	0.03678	0.012336	1e-05	1e-05	0.487518	0.233797
Lebanese Muslim	0.006798	0.018772	0.229481	0.007536	0.052383	0.023476	0.028423	1e-05	0.465392	0.167728
Lebanese Muslim	0.003242	0.007601	0.221713	0.009202	0.034089	0.012393	0.003001	1e-05	0.527083	0.181668
Lebanese Muslim	1e-05	1e-05	0.16592	0.037285	0.048651	0.025174	0.003108	0.010736	0.523448	0.185658
Lebanese Muslim	0.005179	0.007797	0.179242	0.039717	0.040176	1e-05	0.011542	0.002299	0.512577	0.20146
Lebanese Muslim	1e-05	0.008342	0.185043	0.014297	0.042026	0.009469	1e-05	0.003388	0.540921	0.196494
Lebanese Christian	1e-05	1e-05	0.183774	1e-05	0.033012	1e-05	1e-05	0.003568	0.586199	0.193396
Lebanese Christian	1e-05	0.007538	0.170644	0.003948	0.00072	1e-05	1e-05	0.000145	0.583036	0.233939
Lebanese Christian	1e-05	0.007036	0.137323	0.008715	0.002937	1e-05	1e-05	1e-05	0.608561	0.235388
Lebanese Christian	1e-05	0.016666	0.13923	0.004957	0.016035	1e-05	1e-05	1e-05	0.607904	0.215168
Lebanese Christian	1e-05	0.010385	0.174646	0.005436	0.008087	1e-05	1e-05	1e-05	0.624	0.177406
Lebanese Christian	1e-05	0.010181	0.153044	1e-05	0.012327	1e-05	1e-05	0.003502	0.612808	0.208098
Lebanese Christian	1e-05	0.015235	0.170402	0.011812	0.025219	1e-05	1e-05	1e-05	0.583717	0.193575
Lebanese Christian	1e-05	0.018548	0.157532	0.009918	0.048821	1e-05	1e-05	1e-05	0.555032	0.21011
Lebanese Christian	1e-05	0.003825	0.18389	0.019023	0.036397	1e-05	1e-05	1e-05	0.566917	0.189908
Lebanese Christian	1e-05	1e-05	0.178894	0.028672	0.011441	1e-05	1e-05	1e-05	0.609368	0.171575
Lebanese Christian	1e-05	0.016221	0.182862	0.028609	0.044911	1e-05	1e-05	0.001569	0.578901	0.146897
Lebanese Christian	1e-05	0.005841	0.186148	0.002911	0.016513	1e-05	0.003342	1e-05	0.584507	0.200709
Lebanese Christian	1e-05	0.013105	0.165519	0.007579	1e-05	1e-05	1e-05	1e-05	0.606762	0.206985
Lebanese Christian	1e-05	0.004442	0.132772	0.022664	0.038563	0.002583	0.002779	0.004635	0.55987	0.231682
Lebanese Christian	1e-05	0.002832	0.177246	0.004691	0.038863	1e-05	1e-05	1e-05	0.533202	0.243126
Lebanese Christian	1e-05	1e-05	0.188524	0.010977	0.020275	1e-05	1e-05	1e-05	0.60078	0.179394
Lebanese Christian	1e-05	0.010429	0.164699	0.010765	0.005603	1e-05	1e-05	1e-05	0.640202	0.168262
Lebanese Christian	1e-05	0.003671	0.172199	0.002957	0.034163	1.3e-05	1e-05	1e-05	0.591373	0.195594
Lebanese Christian	1e-05	0.010506	0.172191	0.009955	0.017269	1e-05	1e-05	1e-05	0.567282	0.222757
Lebanese Christian	1e-05	0.017877	0.174755	0.001618	0.024591	1e-05	1e-05	1e-05	0.578308	0.202811
Lebanese Christian	1e-05	0.002467	0.196987	0.007362	0.02451	1e-05	1e-05	1e-05	0.564763	0.203873
Lebanese Christian	1e-05	0.005905	0.165821	0.011392	0.014804	1e-05	1e-05	1e-05	0.609243	0.192795
Lebanese Christian	1e-05	0.008851	0.170575	0.011055	1e-05	1e-05	1e-05	1e-05	0.602313	0.207156
Lebanese Christian	1e-05	0.017611	0.16884	0.000522	0.014602	1e-05	1e-05	1e-05	0.608088	0.190296
Lebanese Christian	1e-05	1e-05	0.166936	0.012325	1e-05	1e-05	1e-05	1e-05	0.623615	0.197065
Lebanese Druze	0.001304	1e-05	0.19966	0.027497	1e-05	1e-05	1e-05	1e-05	0.627339	0.14415
Lebanese Druze	0.000629	0.00101	0.234906	0.020612	0.004952	0.007666	1e-05	1e-05	0.583824	0.146381
Lebanese Druze	1e-05	0.012519	0.160273	0.011501	0.028085	0.008495	1e-05	1e-05	0.61555	0.163547
Lebanese Druze	1e-05	0.009482	0.204207	0.024377	0.016566	0.000637	0.001766	0.004198	0.593675	0.145084
Lebanese Druze	1e-05	0.008232	0.198972	0.014371	0.002607	0.002631	1e-05	1e-05	0.577793	0.195364
Lebanese Druze	0.00641	0.019454	0.186654	0.012236	0.005941	1e-05	0.002774	1e-05	0.599207	0.167304
Lebanese Druze	1e-05	1e-05	0.213269	0.002575	0.03627	1e-05	0.003843	1e-05	0.561628	0.182376
Lebanese Druze	1e-05	0.01119	0.201797	0.002285	0.000607	0.005565	1e-05	1e-05	0.614936	0.16359
Lebanese Druze	1e-05	0.009684	0.205618	0.01736	0.012489	0.003038	1e-05	1e-05	0.623046	0.128735
Lebanese Druze	0.000705	0.006477	0.190208	0.001916	0.009051	0.015065	1e-05	1e-05	0.632367	0.144191
Lebanese Druze	1e-05	0.012386	0.176678	0.026347	0.026296	1e-05	1e-05	1e-05	0.627719	0.130534
Lebanese Druze	1e-05	0.003065	0.192777	0.015128	0.005952	1e-05	0.001523	0.005621	0.631383	0.144532
Lebanese Druze	1e-05	0.018797	0.176858	0.041006	1e-05	1e-05	1e-05	1e-05	0.629345	0.133945
Lebanese Druze	0.009263	1e-05	0.186633	0.021681	0.010669	1e-05	0.000257	0.00707	0.637734	0.126672
Lebanese Druze	0.00034	0.01216	0.209522	1e-05	1e-05	0.005206	1e-05	1e-05	0.621016	0.151716
Lebanese Druze	1e-05	0.008549	0.204028	0.027086	0.005426	0.002166	0.000578	0.003864	0.599827	0.148467
Lebanese Druze	1e-05	0.008735	0.20232	0.016378	0.001764	1e-05	1e-05	1e-05	0.620464	0.150299
Lebanese Druze	1e-05	0.028278	0.181069	0.021733	0.018994	1e-05	0.000432	1e-05	0.609078	0.140386
Lebanese Druze	1e-05	0.014512	0.194519	1e-05	1e-05	0.003521	1e-05	1e-05	0.603994	0.183403
Lebanese Druze	1e-05	0.008546	0.192752	0.014525	0.009366	0.002583	1e-05	0.002879	0.611503	0.157825
Lebanese Druze	0.006426	0.011733	0.181465	0.002517	0.011638	1e-05	0.004421	1e-05	0.618043	0.163737
Lebanese Druze	1e-05	0.0117	0.187295	0.011982	0.018611	0.008425	0.00091	0.001339	0.608624	0.151103
Lebanese Druze	1e-05	0.004769	0.191305	0.010595	1e-05	0.002264	1e-05	1e-05	0.641577	0.14945
Lebanese Druze	1e-05	0.001556	0.222928	0.004998	0.030044	1e-05	1e-05	1e-05	0.57304	0.167394
Lebanese Druze	1e-05	0.023379	0.194754	0.023731	0.022112	0.01185	1e-05	1e-05	0.56626	0.157884
Carmel Druze	1e-05	0.00417	0.198366	0.004153	1e-05	0.00313	1e-05	1e-05	0.657943	0.132197
Carmel Druze	0.000477	0.010608	0.180996	0.025483	1e-05	0.01026	0.005122	1e-05	0.670927	0.096108
Carmel Druze	1e-05	0.016679	0.166773	1e-05	1e-05	0.005689	1e-05	0.016487	0.768476	0.025855
Carmel Druze	0.001578	0.001976	0.18203	0.020009	1e-05	0.007646	0.004174	1e-05	0.663461	0.119106
Carmel Druze	1e-05	0.002666	0.197789	1e-05	1e-05	0.011005	0.000646	1e-05	0.719755	0.068099
Carmel Druze	0.007224	3.4e-05	0.172266	0.002707	1e-05	0.010104	0.002421	0.001785	0.68778	0.115669
Carmel Druze	0.003133	0.014585	0.192647	0.029786	1e-05	0.00625	1e-05	0.01143	0.630328	0.11182
Carmel Druze	1e-05	0.026528	0.179527	0.017112	1e-05	1e-05	1e-05	1e-05	0.693821	0.082962
Carmel Druze	0.005635	0.00684	0.181768	1e-05	1e-05	1e-05	1e-05	0.009179	0.727046	0.069492
Carmel Druze	0.001414	0.026201	0.179828	0.009782	1e-05	1e-05	0.003761	1e-05	0.694679	0.084305
Carmel Druze	0.002627	0.024521	0.148772	1e-05	1e-05	0.006917	0.009685	0.004883	0.793739	0.008835
Carmel Druze	1e-05	0.009158	0.171504	0.01554	0.019942	1e-05	0.005828	1e-05	0.584346	0.193652
Carmel Druze	0.003253	0.009	0.189232	0.009489	1e-05	0.012423	1e-05	1e-05	0.700524	0.07605
Carmel Druze	0.003537	0.027777	0.164259	0.017096	0.008247	0.006544	0.001839	0.000314	0.604862	0.165525
Carmel Druze	0.011482	0.012504	0.16418	0.017268	1e-05	0.003118	0.004458	0.00254	0.660987	0.123452
Carmel Druze	0.005502	0.019827	0.163692	0.024639	1e-05	0.007757	0.001927	1e-05	0.664335	0.112301
Carmel Druze	0.001966	0.01689	0.185931	0.028055	1e-05	0.01112	0.009009	1e-05	0.671827	0.075181
Carmel Druze	1e-05	0.007651	0.173277	1e-05	1e-05	0.009089	0.005308	1e-05	0.777306	0.027329
Carmel Druze	0.00155	0.008275	0.203866	1e-05	1e-05	0.004191	0.003608	1e-05	0.700168	0.078311
Carmel Druze	0.001504	1e-05	0.190969	0.012388	1e-05	0.004354	0.008838	1e-05	0.681161	0.100755
Carmel Druze	2e-05	0.020768	0.154651	0.004907	1e-05	0.007046	0.001782	1e-05	0.75931	0.051496
Carmel Druze	1e-05	0.016378	0.172681	0.025592	0.008149	0.008385	1e-05	0.002952	0.592967	0.172876
Carmel Druze	1e-05	0.00974	0.187896	0.016713	0.00809	1e-05	1e-05	1e-05	0.620673	0.156847
Carmel Druze	0.00364	0.006507	0.180232	0.021161	0.035734	0.006888	0.002741	1e-05	0.548054	0.195032
Carmel Druze	0.001846	0.015883	0.163678	1e-05	1e-05	0.006463	0.008318	1e-05	0.775341	0.02844
Cypriot	1e-05	1e-05	0.167239	0.012145	0.082455	1e-05	1e-05	1e-05	0.612238	0.125873
Cypriot	1e-05	0.008222	0.144925	0.011815	0.112099	1e-05	1e-05	1e-05	0.575746	0.147154
Cypriot	1e-05	0.00488	0.163428	0.00748	0.119422	1e-05	1e-05	1e-05	0.58934	0.11541
Cypriot	1e-05	0.007156	0.171684	0.018032	0.105856	1e-05	0.001723	1e-05	0.577429	0.11809
Cypriot	1e-05	0.012054	0.140481	0.024852	0.112476	1e-05	0.00543	1e-05	0.608149	0.096528
Cypriot	1e-05	0.026788	0.134611	0.004373	0.115271	1e-05	1e-05	1e-05	0.590595	0.128322
Cypriot	1e-05	0.017136	0.149561	1e-05	0.101551	1e-05	1e-05	1e-05	0.596424	0.135277
Cypriot	1e-05	0.013456	0.150749	0.010257	0.108154	1e-05	1e-05	1e-05	0.590582	0.126763
Cypriot	1e-05	0.012485	0.151266	0.004901	0.119831	1e-05	1e-05	1e-05	0.589911	0.121567
Cypriot	1e-05	0.018071	0.130891	0.011636	0.140402	1e-05	1e-05	1e-05	0.585972	0.112987
Cypriot	1e-05	0.015895	0.134743	0.016693	0.108357	1e-05	0.001497	0.006741	0.588193	0.12786
Cypriot	1e-05	0.001662	0.170321	0.026015	0.087488	1e-05	1e-05	1e-05	0.589324	0.12515
Sephardic Jew	1e-05	0.00991	0.162011	0.041813	0.191136	1.6e-05	0.002385	1e-05	0.48157	0.111139
Sephardic Jew	1e-05	0.015226	0.124859	0.065205	0.169294	1e-05	1e-05	1e-05	0.48319	0.142185
Sephardic Jew	0.001082	0.005685	0.132915	0.053275	0.207543	1e-05	1e-05	1e-05	0.431126	0.168343
Sephardic Jew	1e-05	0.00668	0.117959	0.075159	0.195166	0.010715	0.000166	1e-05	0.449593	0.144543
Sephardic Jew	0.002898	1e-05	0.115322	0.075014	0.176035	0.001156	1e-05	0.000167	0.485674	0.143713
Sephardic Jew	1e-05	1e-05	0.142061	0.075107	0.15389	1e-05	0.00503	1e-05	0.493632	0.130241
Sephardic Jew	1e-05	0.019832	0.108116	0.068286	0.181429	1e-05	1e-05	1e-05	0.484392	0.137905
Sephardic Jew	1e-05	1e-05	0.141558	0.047096	0.187789	1e-05	0.001351	0.003383	0.488805	0.129988
Sephardic Jew	1e-05	0.009478	0.117534	0.073956	0.189535	1.8e-05	0.006837	1e-05	0.480251	0.122371
Sephardic Jew	1e-05	0.024371	0.131694	0.055931	0.185267	1e-05	0.00128	1e-05	0.484976	0.116451
Sephardic Jew	0.000347	0.005851	0.077194	0.09702	0.355806	0.002275	1e-05	1e-05	0.350746	0.110741
Sephardic Jew	0.001952	0.005544	0.125053	0.041555	0.21839	0.005193	1e-05	0.006585	0.468491	0.127228
Sephardic Jew	1e-05	0.009114	0.133667	0.060377	0.208825	1e-05	0.000144	0.000522	0.433328	0.154002
Sephardic Jew	0.002849	0.013898	0.112027	0.056208	0.160858	1e-05	0.007577	1e-05	0.508701	0.137861
Sephardic Jew	1e-05	0.013106	0.094967	0.03748	0.254773	1e-05	0.004658	0.008305	0.458058	0.128634
Sephardic Jew	1e-05	0.018212	0.138405	0.052475	0.168021	0.004142	0.000741	0.003046	0.492852	0.122096
Sephardic Jew	0.002704	0.010351	0.104674	0.050773	0.22866	1e-05	1e-05	0.00135	0.471228	0.130239
Sephardic Jew	0.002812	0.016275	0.099013	0.050752	0.215966	0.002036	1e-05	1e-05	0.505867	0.10726
Sephardic Jew	0.000318	0.01813	0.108131	0.062886	0.233054	1e-05	1e-05	1e-05	0.46456	0.11289
Ashkenazy Jew	1e-05	1e-05	0.144526	0.028749	0.250387	1e-05	0.009835	0.005123	0.455689	0.10566
Ashkenazy Jew	1.2e-05	0.030411	0.127502	0.001537	0.369694	1e-05	0.033647	0.000502	0.360898	0.075787
Ashkenazy Jew	1e-05	0.019992	0.118056	0.046273	0.273176	1e-05	0.010624	0.005584	0.446096	0.080178
Ashkenazy Jew	0.000846	0.018657	0.14209	0.045841	0.141937	1e-05	0.012596	0.000846	0.48424	0.152937
Ashkenazy Jew	1e-05	0.019156	0.112233	0.029397	0.250651	1e-05	1e-05	0.016889	0.480551	0.091093
Ashkenazy Jew	1e-05	0.018567	0.118495	0.031237	0.244226	1e-05	0.012863	1e-05	0.44984	0.124741
Ashkenazy Jew	1e-05	1e-05	0.134637	0.039239	0.219921	1e-05	1e-05	0.003524	0.496164	0.106475
Ashkenazy Jew	1e-05	0.024973	0.102942	0.040017	0.221494	1e-05	1e-05	0.003504	0.504403	0.102637
Ashkenazy Jew	1e-05	0.004802	0.127943	0.044562	0.242168	0.000326	0.000529	0.001922	0.463043	0.114695
Ashkenazy Jew	8e-05	1e-05	0.133512	0.06535	0.252565	1e-05	0.008215	1e-05	0.455481	0.084767
Ashkenazy Jew	1e-05	0.027919	0.138148	0.015875	0.493169	0.005201	0.001258	0.002403	0.289048	0.026968
Ashkenazy Jew	1e-05	0.016057	0.158509	1e-05	0.460256	1e-05	1e-05	0.005198	0.324739	0.035202
Ashkenazy Jew	1e-05	0.016275	0.116502	0.016522	0.28382	1e-05	0.024201	1e-05	0.432335	0.110315
Ashkenazy Jew	1e-05	0.016121	0.162209	0.020372	0.349343	1e-05	0.028316	0.001848	0.356693	0.065078
Ashkenazy Jew	0.000413	1e-05	0.156329	0.045564	0.212862	1e-05	0.008261	0.003659	0.497336	0.075556
Ashkenazy Jew	1e-05	0.005215	0.135713	0.038385	0.251692	1e-05	0.017976	0.001403	0.436842	0.112754
Ashkenazy Jew	1e-05	0.008469	0.149843	0.042571	0.228208	0.000155	0.008508	0.013994	0.449275	0.098968
Ashkenazy Jew	1e-05	0.00751	0.105327	0.050636	0.270787	1e-05	1e-05	0.013801	0.444117	0.107792
Ashkenazy Jew	1e-05	0.005251	0.136378	0.027239	0.2658	0.001179	0.008264	0.019585	0.453069	0.083226
Ashkenazy Jew	1e-05	0.005467	0.128406	0.02593	0.278647	1e-05	0.024261	1e-05	0.454359	0.082899
Ashkenazy Jew	1e-05	0.030821	0.124349	0.026661	0.259411	1e-05	0.016876	0.003737	0.434484	0.103641
Armenian	1e-05	0.023105	0.271339	1e-05	0.02195	1e-05	1e-05	0.001413	0.606493	0.075661
Armenian	1e-05	0.029433	0.339234	1e-05	0.020345	1e-05	1e-05	1e-05	0.590895	0.020043
Armenian	1e-05	0.021083	0.291082	1e-05	0.008321	1e-05	1e-05	1e-05	0.65169	0.027774
Armenian	1e-05	0.020491	0.286471	1e-05	0.010703	1e-05	1e-05	1e-05	0.660961	0.021323
Armenian	1e-05	0.014826	0.25192	1e-05	0.366596	1e-05	0.044421	1e-05	0.292465	0.029732
Armenian	1e-05	0.03123	0.245834	1e-05	0.035094	1e-05	1e-05	1e-05	0.607562	0.080229
Armenian	1e-05	0.037558	0.280936	1e-05	0.029318	1e-05	0.00712	1e-05	0.59231	0.052718
Armenian	1e-05	0.000339	0.332431	1e-05	0.019728	1e-05	1e-05	1e-05	0.600402	0.04705
Armenian	1e-05	0.023361	0.275435	1e-05	0.050185	1e-05	1e-05	1e-05	0.584002	0.066966
Armenian	1e-05	0.011676	0.302768	1e-05	0.006334	1e-05	1e-05	1e-05	0.675941	0.003231
Armenian	1e-05	0.020372	0.299361	1e-05	0.159829	1e-05	0.00232	1e-05	0.515402	0.002674
Armenian	1e-05	0.031044	0.230851	1e-05	0.377743	1e-05	0.016264	1e-05	0.315928	0.028129
Armenian	1e-05	0.016895	0.289798	1e-05	0.036004	1e-05	1e-05	1e-05	0.599154	0.058099
Armenian	1e-05	0.023558	0.264936	1e-05	0.033631	1e-05	1e-05	1e-05	0.648119	0.029705
Armenian	1e-05	0.006334	0.314754	1e-05	0.01611	1e-05	1e-05	1e-05	0.578564	0.084188
Armenian	1e-05	0.020936	0.319431	1e-05	0.012924	1e-05	1e-05	1e-05	0.6297	0.016959
Armenian	1e-05	0.008074	0.248121	1e-05	0.553417	1e-05	0.009887	1e-05	0.180451	1e-05
Armenian	1e-05	0.010444	0.287369	1e-05	0.010457	1e-05	1e-05	1e-05	0.637627	0.054054
Armenian	1e-05	0.037167	0.297156	1e-05	0.014854	1e-05	1e-05	1e-05	0.597763	0.053011
Georgian	1e-05	0.045535	0.29727	1e-05	0.00514	1e-05	1e-05	1e-05	0.651995	1e-05
Georgian	1e-05	0.025914	0.327764	1e-05	1e-05	1e-05	1e-05	1e-05	0.646252	1e-05
Georgian	1e-05	0.036458	0.330344	1e-05	0.022231	1e-05	1e-05	1e-05	0.610907	1e-05
Georgian	1e-05	0.030986	0.319722	1e-05	1e-05	1e-05	0.000234	1e-05	0.648998	1e-05
Georgian	1e-05	0.025431	0.341789	1e-05	1e-05	1e-05	0.00526	1e-05	0.627459	1e-05
Georgian	1e-05	0.035901	0.309429	1e-05	0.037459	1e-05	1e-05	1e-05	0.617152	1e-05
Georgian	1e-05	0.022184	0.328715	1e-05	0.020788	1e-05	1e-05	1e-05	0.628253	1e-05
Georgian	1e-05	0.048282	0.338143	1e-05	0.014668	1e-05	1e-05	1e-05	0.598847	1e-05
Georgian	1e-05	0.023326	0.346138	1e-05	0.03749	1e-05	1e-05	1e-05	0.592986	1e-05
Georgian	1e-05	0.025665	0.330525	1e-05	0.023476	1e-05	1e-05	1e-05	0.620274	1e-05
Georgian	1e-05	0.033934	0.330284	1e-05	1e-05	1e-05	1e-05	1e-05	0.635712	1e-05
Georgian	1e-05	1e-05	0.343939	1e-05	0.138037	1e-05	0.028445	1e-05	0.489519	1e-05
Georgian	1e-05	0.02156	0.34566	1e-05	1e-05	1e-05	1e-05	1e-05	0.63271	1e-05
Georgian	1e-05	0.025962	0.30621	1e-05	0.19125	1e-05	0.006657	1e-05	0.46987	1e-05
Georgian	1e-05	0.051454	0.316591	1e-05	1e-05	1e-05	1e-05	1e-05	0.631886	1e-05
Georgian	1e-05	0.048271	0.33697	1e-05	0.028124	1e-05	1e-05	1e-05	0.586575	1e-05
Georgian	1e-05	0.036304	0.339544	1e-05	1e-05	1e-05	1e-05	1e-05	0.624082	1e-05
Georgian	1e-05	0.065619	0.319484	1e-05	0.007683	1e-05	0.01175	1e-05	0.595414	1e-05
Georgian	1e-05	0.017292	0.257915	1e-05	0.40226	1e-05	0.050748	1e-05	0.271736	1e-05
Georgian	1e-05	0.047725	0.290755	1e-05	0.180063	1e-05	0.013451	1e-05	0.467956	1e-05
Adygei	1e-05	0.028059	0.317036	1e-05	0.159061	1e-05	0.038116	0.015694	0.441994	1e-05
Adygei	1e-05	0.017098	0.287799	1e-05	0.349067	1e-05	0.081302	0.008449	0.256244	1e-05
Adygei	1e-05	0.039936	0.326809	1e-05	0.152032	1e-05	0.068483	0.002159	0.410542	1e-05
Adygei	1e-05	0.042511	0.345704	1e-05	0.141464	1e-05	0.015695	1e-05	0.454576	1e-05
Adygei	1e-05	0.017524	0.341605	1e-05	0.141183	1e-05	0.03243	1e-05	0.467208	1e-05
Adygei	1e-05	0.043798	0.338867	1e-05	0.130604	1e-05	0.02871	1e-05	0.457971	1e-05
Adygei	1e-05	0.01818	0.328628	1e-05	0.185231	1e-05	0.075176	0.02549	0.367254	1e-05
Adygei	1e-05	0.029946	0.331803	1e-05	0.133291	1e-05	0.032651	1e-05	0.47226	1e-05
Adygei	1e-05	0.03452	0.309063	1e-05	0.274755	1e-05	0.060898	1e-05	0.320713	1e-05
Adygei	1e-05	0.014338	0.342567	1e-05	0.165995	1e-05	0.071208	1e-05	0.405842	1e-05
Adygei	1e-05	0.02926	0.33326	1e-05	0.138812	1e-05	0.022971	1e-05	0.475647	1e-05
Adygei	1e-05	0.025251	0.359436	1e-05	0.125865	1e-05	0.037903	1e-05	0.451495	1e-05
Adygei	1e-05	0.032288	0.336316	1e-05	0.132471	1e-05	0.017588	0.019634	0.461664	1e-05
Adygei	1e-05	0.030867	0.330863	1e-05	0.157757	1e-05	0.033729	1e-05	0.446734	1e-05
Adygei	1e-05	0.048599	0.328215	1e-05	0.116543	1e-05	0.020364	1e-05	0.486228	1e-05
Adygei	1e-05	0.049609	0.307848	1e-05	0.148985	1e-05	0.029029	1e-05	0.46448	1e-05
Adygei	1e-05	0.037105	0.339286	1e-05	0.113276	1e-05	0.076427	0.006029	0.427838	1e-05
Turk	1e-05	0.013678	0.245552	1e-05	0.140365	1e-05	0.066469	0.032841	0.422983	0.078083
Turk	1e-05	0.021146	0.247568	1e-05	0.134386	1e-05	0.054765	0.013107	0.470216	0.058782
Turk	1e-05	0.028211	0.290771	1e-05	0.088355	1e-05	0.030707	0.008436	0.501805	0.051684
Turk	1e-05	0.02461	0.229838	1e-05	0.08351	1e-05	0.051111	0.039386	0.511236	0.060279
Turk	1e-05	0.011446	0.294545	1e-05	0.129176	1e-05	0.059216	0.033126	0.47245	1e-05
Turk	1e-05	0.025436	0.274988	1e-05	0.085465	1e-05	0.045114	1e-05	0.488481	0.080475
Turk	1e-05	0.003975	0.253822	1e-05	0.121862	1e-05	0.031486	0.032381	0.476394	0.08005
Turk	0.004111	0.02078	0.288629	1e-05	0.104958	0.007041	0.037801	0.014549	0.472304	0.049816
Turk	1e-05	0.036709	0.378381	1e-05	0.043504	1e-05	0.017639	1e-05	0.474838	0.04889
Turk	1e-05	0.014502	0.245306	1e-05	0.101251	1e-05	0.031794	0.01605	0.527762	0.063305
Turk	1e-05	0.02028	0.276573	1e-05	0.165818	1e-05	0.057682	0.008536	0.421695	0.049387
Turk	1e-05	0.010311	0.255162	1e-05	0.125845	1e-05	0.063236	0.003747	0.480095	0.061574
Turk	1e-05	0.036796	0.306468	1e-05	0.1258	1e-05	0.022343	0.009562	0.464972	0.034029
Turk	1e-05	0.031932	0.251841	1e-05	0.134295	1e-05	0.037153	0.011594	0.463297	0.069856
Turk	1e-05	0.017441	0.277359	1e-05	0.073839	1e-05	0.071728	0.023027	0.453793	0.082784
Turk	1e-05	0.040276	0.31489	1e-05	0.165433	1e-05	0.081696	0.006163	0.391503	1e-05
Turk	1e-05	0.012236	0.246589	1e-05	0.138317	1e-05	0.061784	0.024512	0.495185	0.021346
Turk	1e-05	0.010495	0.249859	1e-05	0.114271	1e-05	0.060885	0.032567	0.478596	0.053298
Turk	1.9e-05	0.021394	0.28818	1e-05	0.075735	1e-05	0.038915	0.025232	0.486759	0.063747
Iranian	0.012588	0.003308	0.298465	0.014042	1e-05	0.106663	1e-05	0.017138	0.322899	0.224877
Iranian	1e-05	0.029043	0.417782	1e-05	0.031189	1e-05	0.018816	0.01791	0.404838	0.080392
Iranian	0.000588	0.028752	0.437066	1e-05	0.023726	0.00967	0.008717	1e-05	0.369601	0.121861
Iranian	1e-05	0.037573	0.403821	1e-05	0.026663	1e-05	0.017417	1e-05	0.423832	0.090653
Iranian	0.002949	0.033642	0.358947	1e-05	0.028151	0.006431	0.010529	1e-05	0.431138	0.128193
Iranian	0.000978	0.021189	0.300856	0.006873	0.017062	0.035659	0.005726	0.008463	0.370813	0.232381
Iranian	0.010673	0.020666	0.382679	0.036295	0.014093	0.120091	0.008189	0.007737	0.269853	0.129725
Iranian	1e-05	0.023647	0.431154	1e-05	0.074654	1e-05	0.009402	0.013719	0.37234	0.075054
Iranian	0.006657	0.032051	0.407466	1e-05	0.029024	0.028495	0.005943	0.008991	0.32734	0.154022
Iranian	0.005029	0.019064	0.44175	1e-05	0.019357	0.001863	0.01661	0.018353	0.438731	0.039233
Iranian	1e-05	0.025379	0.408795	1e-05	0.02268	1e-05	0.016697	0.018624	0.446453	0.061342
Iranian	1e-05	0.030465	0.397098	0.004067	0.010254	1e-05	0.019452	0.016476	0.435034	0.087134
Iranian	0.009907	0.017724	0.236842	0.025055	0.041207	0.041206	1e-05	1e-05	0.292805	0.335234
Iranian	1e-05	0.043321	0.40679	1e-05	0.052656	1e-05	0.029256	0.009032	0.375274	0.08364
Iranian	0.00437	0.029865	0.399118	1e-05	1e-05	0.008247	0.007963	1e-05	0.431207	0.1192
Iranian	1e-05	0.028373	0.448355	1e-05	0.025912	1e-05	0.011076	0.01591	0.410544	0.0598
Iranian	0.005065	0.029223	0.456409	0.006735	0.026953	0.008167	0.007157	0.01231	0.35595	0.09203
Iranian	0.00169	0.03953	0.433968	1e-05	0.029557	0.001283	0.01071	0.008	0.38495	0.090303
Iranian	0.000968	0.065324	0.337633	1e-05	0.040965	0.002912	0.028142	1e-05	0.422066	0.10197
Iranian	0.002416	0.023023	0.424243	1e-05	0.015441	1e-05	0.009151	0.029498	0.431161	0.065048
Italian	1e-05	0.010439	0.124827	1e-05	0.49658	1e-05	1e-05	1e-05	0.352205	0.015898
Italian	1e-05	1e-05	0.091653	0.005236	0.508467	1e-05	1e-05	0.003677	0.370412	0.020515
Italian	1e-05	0.004612	0.113641	0.001569	0.518999	1e-05	1e-05	1e-05	0.356912	0.004226
Italian	1e-05	0.010097	0.095857	0.007959	0.482574	1e-05	1e-05	1e-05	0.38171	0.021763
Italian	1e-05	0.013402	0.087505	1e-05	0.495232	1e-05	1e-05	0.005666	0.376597	0.021558
Italian	1e-05	0.005757	0.134962	0.018395	0.423443	1e-05	0.000142	0.004857	0.357295	0.055129
Italian	1e-05	0.012835	0.101721	1e-05	0.483345	1e-05	1e-05	1e-05	0.38671	0.015339
Italian	1e-05	0.026317	0.110868	0.004786	0.412229	1e-05	1e-05	1e-05	0.394489	0.05127
Italian	1e-05	0.018591	0.083553	1e-05	0.508425	1e-05	1e-05	1e-05	0.361147	0.028235
Italian	1e-05	0.023326	0.128137	0.017441	0.415428	1e-05	0.000463	1e-05	0.39967	0.015505
Italian	1e-05	1e-05	0.126643	0.010675	0.497887	1e-05	0.000698	1e-05	0.364047	1e-05
Italian	1e-05	0.013674	0.110675	1e-05	0.389277	1e-05	1e-05	1e-05	0.431481	0.054843
Italian	1e-05	0.018579	0.083747	0.016099	0.555789	1e-05	1e-05	1e-05	0.303099	0.022648
Italian	1e-05	0.002057	0.097846	1e-05	0.437622	1e-05	1e-05	1e-05	0.41215	0.050274
Italian	1e-05	0.014428	0.102434	0.017533	0.493176	1e-05	1e-05	1e-05	0.349044	0.023344
Italian	1e-05	0.012105	0.101507	1e-05	0.414187	1e-05	0.003587	0.001192	0.44432	0.023071
Italian	1e-05	0.018947	0.089356	1.9e-05	0.507003	1e-05	0.001992	1e-05	0.367424	0.015229
Italian	1e-05	0.010452	0.102873	1e-05	0.436737	1e-05	1e-05	0.000577	0.397741	0.05158
Italian	1e-05	1e-05	0.080936	1e-05	0.497945	1e-05	1e-05	0.002948	0.408094	0.010027
Italian	1e-05	0.012902	0.086079	0.011756	0.545671	1e-05	1e-05	1e-05	0.339049	0.004504
Italian	1e-05	1e-05	0.098276	0.006624	0.429394	1e-05	1e-05	1e-05	0.426565	0.039091
Sardinian	1e-05	1e-05	1e-05	0.039464	0.489005	1e-05	1e-05	1e-05	0.471461	1e-05
Sardinian	1e-05	1e-05	1e-05	0.062504	0.442672	1e-05	1e-05	1e-05	0.494754	1e-05
Sardinian	1e-05	1e-05	1e-05	0.048244	0.459868	1e-05	1e-05	1e-05	0.491818	1e-05
Sardinian	1e-05	1e-05	1e-05	0.041378	0.4535	1e-05	1e-05	1e-05	0.505052	1e-05
Sardinian	1e-05	1e-05	1e-05	0.024394	0.44136	1e-05	1e-05	1e-05	0.534176	1e-05
Sardinian	1e-05	1e-05	1e-05	0.043309	0.47974	1e-05	1e-05	1e-05	0.476882	1e-05
Sardinian	1e-05	1e-05	1e-05	0.03935	0.470001	1e-05	1e-05	1e-05	0.490579	1e-05
Sardinian	1e-05	1e-05	1e-05	0.03801	0.416186	1e-05	1e-05	1e-05	0.545734	1e-05
Sardinian	1e-05	1e-05	1e-05	0.040767	0.442459	1e-05	1e-05	1e-05	0.516703	1e-05
Sardinian	1e-05	1e-05	1e-05	0.042505	0.436687	1e-05	1e-05	1e-05	0.520738	1e-05
Sardinian	1e-05	1e-05	1e-05	0.038406	0.434609	1e-05	1e-05	1e-05	0.526914	1e-05
Sardinian	1e-05	1e-05	1e-05	0.086073	0.437508	1e-05	1e-05	1e-05	0.476349	1e-05
Sardinian	1e-05	1e-05	1e-05	0.039494	0.425223	1e-05	1e-05	1e-05	0.535213	1e-05
Sardinian	1e-05	1e-05	1e-05	0.05693	0.459993	1e-05	1e-05	1e-05	0.483007	1e-05
Sardinian	1e-05	1e-05	1e-05	0.045227	0.461103	1e-05	1e-05	1e-05	0.4936	1e-05
Sardinian	1e-05	1e-05	1e-05	0.064003	0.431535	1e-05	1e-05	1e-05	0.486388	0.018013
Sardinian	1e-05	1e-05	1e-05	0.032842	0.440822	1e-05	1e-05	1e-05	0.526266	1e-05
Sardinian	1e-05	1e-05	1e-05	0.037507	0.488359	1e-05	1e-05	1e-05	0.474065	1e-05
Sardinian	1e-05	1e-05	1e-05	0.049455	0.427459	1e-05	1e-05	1e-05	0.523016	1e-05
Sardinian	1e-05	1e-05	1e-05	0.066778	0.434819	1e-05	1e-05	1e-05	0.498333	1e-05
Sardinian	1e-05	1e-05	1e-05	0.044029	0.452864	1e-05	1e-05	1e-05	0.503038	1e-05
Sardinian	1e-05	1e-05	1e-05	0.052879	0.424843	1e-05	1e-05	1e-05	0.515503	0.006715
Sardinian	1e-05	1e-05	1e-05	0.040882	0.449738	1e-05	1e-05	1.6e-05	0.509304	1e-05
Sardinian	1e-05	1e-05	1e-05	0.049246	0.450762	1e-05	1e-05	1e-05	0.499923	1e-05
Sardinian	1e-05	1e-05	1e-05	0.042984	0.456	1e-05	1e-05	1e-05	0.500946	1e-05
French	1e-05	0.00211	0.132692	1e-05	0.602466	1e-05	0.002849	1e-05	0.240848	0.018996
French	1e-05	0.025618	0.160504	1e-05	0.694028	1e-05	1e-05	1e-05	0.11979	1e-05
French	1e-05	0.007449	0.128123	1e-05	0.663694	1e-05	1e-05	1e-05	0.19892	0.001764
French	1e-05	0.012821	0.122	1.5e-05	0.669452	1e-05	0.00157	1e-05	0.194102	1e-05
French	1e-05	1e-05	0.153719	1e-05	0.77675	1e-05	1e-05	1e-05	0.069461	1e-05
French	1e-05	0.019262	0.103592	1e-05	0.693932	1e-05	1e-05	1e-05	0.165811	0.017353
French	1.1e-05	0.016479	0.156993	1e-05	0.712016	1e-05	1e-05	1e-05	0.114451	1e-05
French	1e-05	0.013533	0.120974	1e-05	0.613728	1e-05	1e-05	1e-05	0.238159	0.013556
French	1e-05	0.013164	0.110021	1e-05	0.622259	1e-05	1e-05	0.001566	0.249723	0.003228
French	1e-05	0.009111	0.101203	0.009716	0.59979	1e-05	1e-05	0.001723	0.25038	0.028047
French	1e-05	0.023919	0.131146	0.003945	0.620246	1e-05	1e-05	0.002311	0.218394	1e-05
French	1e-05	0.02029	0.120006	0.010633	0.629946	1e-05	0.00524	0.002083	0.211212	0.000569
French	1e-05	0.009818	0.11056	1e-05	0.635171	1e-05	0.001187	1e-05	0.243215	1e-05
French	1e-05	0.013527	0.14235	1e-05	0.647914	1e-05	0.003603	1e-05	0.192557	1e-05
French	1e-05	0.009295	0.145125	1e-05	0.673468	1e-05	1e-05	1e-05	0.172052	1e-05
French	1e-05	0.027215	0.098752	0.01956	0.631074	1e-05	1e-05	1e-05	0.213852	0.009508
French	1e-05	0.013896	0.12994	1e-05	0.666802	1e-05	1e-05	0.000375	0.188937	1e-05
French	1e-05	0.019807	0.146852	0.003883	0.652499	1e-05	1e-05	1e-05	0.176909	1e-05
French	1e-05	0.012101	0.100231	0.003197	0.667622	1e-05	1e-05	1e-05	0.202932	0.013877
French	1e-05	1e-05	0.126835	0.032719	0.522531	1e-05	0.004155	1e-05	0.294987	0.018734
French	1e-05	1e-05	0.137517	1e-05	0.797807	1e-05	1e-05	1e-05	0.064606	1e-05
French	1e-05	0.014669	0.135552	0.000162	0.639106	1e-05	0.007539	1e-05	0.202581	0.000361
French	1e-05	0.010256	0.133397	1e-05	0.638022	1e-05	1e-05	1e-05	0.216449	0.001825
French	1e-05	0.006224	0.173646	1e-05	0.702339	1e-05	1e-05	1e-05	0.117732	1e-05
French	1e-05	0.008425	0.042999	1e-05	0.703846	1e-05	1e-05	1e-05	0.226633	0.018046
Spaniard	1e-05	0.002227	0.097601	0.038002	0.605499	1e-05	1e-05	1e-05	0.247265	0.009365
Spaniard	1e-05	0.012513	0.074917	0.027936	0.633353	1e-05	6.3e-05	1e-05	0.231393	0.019796
Spaniard	1e-05	0.011244	0.079797	0.030852	0.59973	1e-05	1e-05	1e-05	0.260572	0.017764
Spaniard	1e-05	0.002979	0.085673	0.011528	0.629141	1e-05	0.004478	1e-05	0.26297	0.003201
Spaniard	0.001794	0.013294	0.083199	0.033054	0.601414	1e-05	1e-05	1e-05	0.267205	1e-05
Spaniard	1e-05	0.01562	0.072359	0.026157	0.575026	1e-05	1e-05	0.002811	0.277386	0.03061
Spaniard	0.001941	0.008015	0.059562	0.064638	0.577262	1e-05	1e-05	1e-05	0.237937	0.050614
Spaniard	0.003648	0.012723	0.054836	0.050371	0.553802	1e-05	1e-05	1e-05	0.280059	0.044531
Spaniard	0.001474	0.014186	0.08749	0.080096	0.550275	1e-05	1e-05	1e-05	0.245556	0.020893
Spaniard	1e-05	1e-05	0.081168	0.034806	0.58436	0.002273	1e-05	1e-05	0.263323	0.034031
Spaniard	0.002728	0.01842	0.062506	0.049611	0.545294	0.003467	1e-05	0.001304	0.280612	0.036047
Spaniard	1e-05	0.006849	0.076666	0.065218	0.593433	1e-05	1e-05	1e-05	0.251849	0.005944
Basque	1e-05	0.002246	0.042299	0.014883	0.772958	1e-05	1e-05	1e-05	0.163539	0.004034
Basque	1e-05	0.030723	0.01617	1e-05	0.771095	1e-05	1e-05	1e-05	0.181951	1e-05
Basque	1e-05	1e-05	0.049435	1e-05	0.786424	1e-05	1e-05	1e-05	0.156577	0.007503
Basque	1e-05	0.012329	0.033649	1e-05	0.759048	1e-05	1e-05	1e-05	0.185441	0.009482
Basque	1e-05	1e-05	0.044569	1e-05	0.750743	1e-05	1e-05	1e-05	0.204618	1e-05
Basque	1e-05	1e-05	0.016617	1e-05	0.788478	1e-05	1e-05	1e-05	0.148493	0.046352
Basque	1.3e-05	1e-05	0.02229	1e-05	0.773186	1e-05	1e-05	1e-05	0.191726	0.012736
Basque	1e-05	0.003656	0.04583	1e-05	0.767907	1e-05	1e-05	1e-05	0.161527	0.02103
Basque	1e-05	0.000417	0.01632	1e-05	0.791198	1e-05	1e-05	1e-05	0.185784	0.006232
Basque	1e-05	0.000327	0.030904	1e-05	0.770718	1e-05	1e-05	1e-05	0.166438	0.031563
Basque	1e-05	0.005053	0.045959	1e-05	0.81308	1e-05	1e-05	1e-05	0.127904	0.007955
Basque	1e-05	1e-05	0.041911	0.003767	0.794217	1e-05	1e-05	1e-05	0.1518	0.008255
Basque	1e-05	0.009986	0.011926	8.7e-05	0.783939	1e-05	1e-05	1e-05	0.187731	0.00629
Basque	1e-05	0.002454	0.047035	1e-05	0.755532	1e-05	1e-05	1e-05	0.194919	1e-05
Basque	1e-05	0.011072	0.041936	1e-05	0.780523	1e-05	1e-05	1e-05	0.166409	1e-05
Basque	1e-05	0.013613	0.02166	0.001511	0.751347	1e-05	1e-05	1e-05	0.202592	0.009237
Basque	1e-05	1e-05	0.025703	0.026016	0.753859	1e-05	1e-05	1e-05	0.194361	1e-05
Basque	1e-05	0.00301	0.047271	1e-05	0.768831	1e-05	1e-05	0.004745	0.173202	0.002901
Basque	1e-05	0.00452	0.028956	1e-05	0.778183	1e-05	1e-05	1e-05	0.188281	1e-05
Basque	1e-05	0.00077	0.03883	1e-05	0.736327	1e-05	1e-05	1e-05	0.200472	0.023552
Basque	1e-05	0.017666	0.017283	0.00143	0.733687	1e-05	1e-05	1e-05	0.229883	1e-05
Basque	1e-05	0.007374	0.042233	1e-05	0.737185	1e-05	1e-05	1e-05	0.213147	1e-05
Basque	1e-05	1e-05	0.016708	1e-05	0.769554	1e-05	1e-05	1e-05	0.177929	0.035749
Basque	1e-05	1e-05	0.020622	1e-05	0.770191	1e-05	1e-05	1e-05	0.209005	0.000122
Orcadian	1e-05	0.034662	0.118977	1e-05	0.843708	1e-05	1e-05	1e-05	1e-05	0.002592
Orcadian	1e-05	0.012919	0.14781	1e-05	0.798619	1e-05	1e-05	1e-05	0.037062	0.003539
Orcadian	1e-05	0.001503	0.199219	1e-05	0.750722	1e-05	1e-05	1e-05	0.048495	1e-05
Orcadian	1e-05	0.025085	0.175012	1e-05	0.761381	1e-05	1e-05	1e-05	0.038462	1e-05
Orcadian	1e-05	0.023449	0.176322	1e-05	0.755927	1e-05	1e-05	1e-05	0.044241	1e-05
Orcadian	1e-05	0.016903	0.154799	1e-05	0.77422	1.1e-05	1e-05	1e-05	0.054017	1e-05
Orcadian	1e-05	0.01464	0.185223	1e-05	0.755417	1e-05	1e-05	1e-05	0.04466	1e-05
Orcadian	1e-05	0.022869	0.151414	1e-05	0.754618	1e-05	1e-05	1e-05	0.071039	1e-05
Orcadian	1e-05	0.037441	0.138988	1.2e-05	0.743222	1e-05	0.00179	1e-05	0.078508	1e-05
Orcadian	1e-05	0.031496	0.144988	1e-05	0.773659	1e-05	1e-05	1e-05	0.049797	1e-05
Orcadian	1e-05	0.023864	0.123182	1e-05	0.84215	1e-05	1e-05	1e-05	1e-05	0.010744
Orcadian	1e-05	0.02534	0.16654	1e-05	0.774353	1e-05	1e-05	1e-05	0.033707	1e-05
Orcadian	1e-05	0.017121	0.149624	1e-05	0.774135	1e-05	0.00098	1e-05	0.05809	1e-05
Orcadian	1e-05	0.020917	0.149135	1e-05	0.790304	1e-05	1e-05	1e-05	0.039584	1e-05
Orcadian	1e-05	0.017352	0.141453	1e-05	0.770455	1e-05	1e-05	1e-05	0.070681	1e-05
Orcadian	1e-05	0.027226	0.172439	1e-05	0.709043	1e-05	1e-05	1e-05	0.091233	1e-05
Hungarian	1e-05	0.007739	0.169938	1e-05	0.697791	1e-05	0.024647	1e-05	0.099835	1e-05
Hungarian	1e-05	0.014742	0.173771	1e-05	0.633925	1e-05	0.018334	1e-05	0.159177	1e-05
Hungarian	1e-05	0.011582	0.183149	1e-05	0.61052	1e-05	0.007169	1e-05	0.184685	0.002855
Hungarian	1e-05	0.025045	0.159302	1e-05	0.624819	1e-05	0.015636	1e-05	0.175148	1e-05
Hungarian	1e-05	0.020834	0.158296	1e-05	0.719507	1e-05	0.002927	1e-05	0.098386	1e-05
Hungarian	1e-05	0.014827	0.156359	1e-05	0.606403	1e-05	0.011231	1e-05	0.195561	0.015579
Hungarian	1e-05	0.02218	0.148849	1e-05	0.623623	1e-05	0.021066	1e-05	0.184231	1e-05
Hungarian	1e-05	0.035352	0.152799	1e-05	0.643177	1e-05	0.001915	1e-05	0.166707	1e-05
Hungarian	1e-05	0.014187	0.16511	1e-05	0.614604	1e-05	0.021834	1e-05	0.184214	1e-05
Hungarian	1e-05	0.006	0.149317	1e-05	0.616962	1e-05	0.012321	1e-05	0.209483	0.005877
Hungarian	1e-05	0.025864	0.136008	1e-05	0.641943	1e-05	0.000835	0.001393	0.181498	0.012429
Hungarian	1e-05	0.024879	0.16525	1e-05	0.620738	1e-05	0.013731	1e-05	0.175351	1e-05
Hungarian	1e-05	0.027025	0.134841	1e-05	0.608326	1e-05	0.021176	1e-05	0.183976	0.024617
Hungarian	1e-05	0.012194	0.14938	1e-05	0.695175	1e-05	0.024657	1e-05	0.118544	1e-05
Hungarian	1e-05	0.009039	0.181552	1e-05	0.633247	1e-05	0.02572	1e-05	0.150392	1e-05
Hungarian	1e-05	0.010489	0.167539	1e-05	0.647364	1e-05	0.009815	1e-05	0.164743	1e-05
Hungarian	1e-05	0.01199	0.147462	1e-05	0.638324	1e-05	0.013177	1e-05	0.188996	1e-05
Hungarian	1e-05	0.013438	0.157669	1e-05	0.64082	1e-05	0.009469	1e-05	0.178555	1e-05
Hungarian	1e-05	0.009002	0.192046	1e-05	0.603967	1e-05	0.010968	1e-05	0.183966	1e-05
Hungarian	1.2e-05	0.016171	0.175808	1e-05	0.664848	1e-05	0.006987	1e-05	0.12483	0.011314
Russian	1e-05	0.014435	0.213622	1e-05	0.692423	1e-05	0.07946	1e-05	1e-05	1e-05
Russian	1e-05	0.021834	0.171782	1e-05	0.711809	1e-05	0.094515	1e-05	1e-05	1e-05
Russian	1e-05	0.013167	0.189537	1e-05	0.709459	1e-05	0.087777	1e-05	1e-05	1e-05
Russian	1e-05	0.017784	0.177695	1e-05	0.706721	1e-05	0.097741	1e-05	1e-05	1e-05
Russian	1e-05	0.011051	0.186578	1e-05	0.711114	1e-05	0.091198	1e-05	1e-05	1e-05
Russian	1e-05	0.041316	0.161407	1e-05	0.711217	1e-05	0.086	1e-05	1e-05	1e-05
Russian	1e-05	0.024145	0.202231	1e-05	0.692566	1e-05	0.080998	1e-05	1e-05	1e-05
Russian	1e-05	0.027416	0.185074	1e-05	0.697363	1e-05	0.090087	1e-05	1e-05	1e-05
Russian	1e-05	0.041028	0.177022	1e-05	0.678054	1e-05	0.103836	1e-05	1e-05	1e-05
Russian	1e-05	0.02332	0.180232	1e-05	0.695256	1e-05	0.101132	1e-05	1e-05	1e-05
Russian	1e-05	0.025242	0.19321	1e-05	0.677319	1e-05	0.10417	1e-05	1e-05	1e-05
Russian	1e-05	0.029952	0.201056	1e-05	0.705759	1e-05	0.063174	1e-05	1e-05	1e-05
Russian	1e-05	0.02549	0.199194	1e-05	0.676045	1e-05	0.099211	1e-05	1e-05	1e-05
Russian	1e-05	0.027464	0.193725	1e-05	0.696883	1e-05	0.081867	1e-05	1e-05	1e-05
Russian	1e-05	0.035846	0.176443	1e-05	0.697917	1e-05	0.089734	1e-05	1e-05	1e-05
Russian	1e-05	0.043043	0.187147	1e-05	0.681343	1e-05	0.088407	1e-05	1e-05	1e-05
Russian	1e-05	0.022437	0.187383	1e-05	0.680017	1e-05	0.110103	1e-05	1e-05	1e-05
Russian	1e-05	0.029474	0.188965	1e-05	0.696459	1e-05	0.085042	1e-05	1e-05	1e-05
Russian	1e-05	0.01461	0.190135	1e-05	0.698031	1e-05	0.087309	1.1e-05	0.009864	1e-05
Russian	1e-05	0.015414	0.192391	1e-05	0.697563	1e-05	0.094572	1e-05	1e-05	1e-05
Russian	1e-05	0.023617	0.180647	1e-05	0.688219	1e-05	0.107457	1e-05	1e-05	1e-05
Russian	1e-05	0.011062	0.205673	1e-05	0.706429	1e-05	0.076755	1e-05	3.1e-05	1e-05
Russian	1e-05	0.013083	0.195054	1e-05	0.728688	1e-05	0.063115	1e-05	1e-05	1e-05
Russian	1e-05	0.010387	0.177872	1e-05	0.70903	1e-05	0.10265	1e-05	1e-05	1e-05
Russian	1e-05	0.017175	0.187855	1e-05	0.707614	1e-05	0.087296	1e-05	1e-05	1e-05
Burusho	1e-05	0.068028	0.67681	1e-05	0.092554	1e-05	0.031122	0.131437	1e-05	1e-05
Burusho	1e-05	0.055261	0.667304	0.004073	0.100193	1e-05	0.062181	0.110947	1e-05	1e-05
Burusho	1e-05	0.062204	0.697021	1e-05	0.061571	1e-05	0.012693	0.158497	0.007975	1e-05
Burusho	1e-05	0.077298	0.663219	1e-05	0.081458	1e-05	0.044457	0.133519	1e-05	1e-05
Burusho	1e-05	0.088168	0.661436	1e-05	0.089583	1e-05	0.036295	0.124468	1e-05	1e-05
Burusho	1e-05	0.094272	0.65494	1e-05	0.082938	1e-05	0.027348	0.139144	0.001319	1e-05
Burusho	1e-05	0.084444	0.639293	1e-05	0.09208	1e-05	0.055601	0.128532	1e-05	1e-05
Burusho	1e-05	0.071709	0.659213	1e-05	0.106092	1e-05	0.026755	0.136181	1e-05	1e-05
Burusho	1e-05	0.072487	0.672824	0.005583	0.044579	1e-05	0.041249	0.163239	1e-05	1e-05
Burusho	1e-05	0.081609	0.661452	1e-05	0.095293	1e-05	0.024795	0.136801	1e-05	1e-05
Burusho	1e-05	0.075277	0.666415	1e-05	0.079705	1e-05	0.052656	0.125897	1e-05	1e-05
Burusho	1e-05	0.06646	0.676678	1e-05	0.08432	1e-05	0.036387	0.136104	1e-05	1e-05
Burusho	1e-05	0.062692	0.664984	1e-05	0.094489	1e-05	0.054893	0.122892	1e-05	1e-05
Burusho	1e-05	0.060514	0.689175	1e-05	0.057506	1e-05	0.031161	0.140589	0.021016	1e-05
Burusho	1e-05	0.080721	0.65332	1e-05	0.070642	1e-05	0.04621	0.149057	1e-05	1e-05
Burusho	1e-05	0.07142	0.66841	1e-05	0.078981	1e-05	0.037676	0.143463	1e-05	1e-05
Burusho	1e-05	0.088013	0.685235	1e-05	0.076685	1e-05	0.043534	0.106484	1e-05	1e-05
Burusho	1e-05	0.070927	0.656951	1e-05	0.093437	1e-05	0.030618	0.148017	1e-05	1e-05
Burusho	1e-05	0.060156	0.706792	1e-05	0.073286	1e-05	0.046485	0.113231	1e-05	1e-05
Burusho	1e-05	0.065781	0.656281	1e-05	0.080214	1e-05	0.05285	0.144824	1e-05	1e-05
Burusho	1e-05	0.06628	0.705761	1e-05	0.065624	1e-05	0.022495	0.136575	0.003225	1e-05
Burusho	1e-05	0.069062	0.673455	1e-05	0.085664	1e-05	0.035358	0.135432	0.000989	1e-05
Burusho	1e-05	0.072435	0.653843	1e-05	0.103969	1e-05	0.039739	0.128467	1e-05	0.001508
Burusho	1e-05	0.060728	0.682915	1e-05	0.082733	1e-05	0.029292	0.144282	1e-05	1e-05
Burusho	1e-05	0.080795	0.667001	1e-05	0.070371	1e-05	0.047046	0.134737	1e-05	1e-05
Pathan	1e-05	0.086002	0.681362	1e-05	0.088373	1e-05	0.013602	0.076215	0.054406	1e-05
Pathan	1e-05	0.050216	0.668673	1e-05	0.096135	1e-05	0.028351	0.055878	0.100707	1e-05
Pathan	1e-05	0.077967	0.650565	1e-05	0.103856	1e-05	0.031345	0.036999	0.099228	1e-05
Pathan	0.002085	0.075568	0.698834	0.005762	0.074218	1e-05	0.027187	0.091763	1e-05	0.024564
Pathan	1e-05	0.072562	0.666605	1e-05	0.087601	1e-05	0.027484	0.075723	0.069984	1e-05
Pathan	1e-05	0.03511	0.598678	1e-05	0.091833	1e-05	0.030247	0.058804	0.14534	0.039957
Pathan	1e-05	0.067824	0.765896	1e-05	0.038405	1e-05	0.017412	0.104339	1e-05	0.006085
Pathan	1e-05	0.074626	0.667433	1e-05	0.095803	1e-05	0.011734	0.080743	0.060136	0.009493
Pathan	1e-05	0.060437	0.679596	1e-05	0.113591	1e-05	0.016921	0.050622	0.056551	0.022253
Pathan	1e-05	0.05783	0.397467	1e-05	0.117939	1e-05	0.184826	0.153885	0.078807	0.009217
Pathan	1e-05	0.068398	0.665162	0.009874	0.097457	1e-05	0.025711	0.073356	0.060012	1e-05
Pathan	1e-05	0.065595	0.683996	1.7e-05	0.091294	1e-05	0.02805	0.067075	0.055529	0.008424
Pathan	1e-05	0.07797	0.6612	1e-05	0.113072	1e-05	0.029857	0.039486	0.065727	0.012657
Pathan	1e-05	0.051147	0.70561	0.000196	0.114962	1e-05	0.021497	0.074733	0.03139	0.000446
Pathan	1e-05	0.082999	0.689953	0.007145	0.102811	1e-05	0.037968	0.069796	0.002484	0.006824
Pathan	1e-05	0.061985	0.763208	1e-05	0.062382	1e-05	0.006849	0.071359	0.034178	1e-05
Pathan	1e-05	0.065639	0.68741	1e-05	0.114602	1e-05	0.024343	0.043211	0.064755	1e-05
Pathan	1e-05	0.055021	0.659736	1e-05	0.129458	1e-05	0.031975	0.049699	0.073432	0.000649
Pathan	1e-05	0.07132	0.670823	1e-05	0.094194	1e-05	0.027223	0.029759	0.10664	1e-05
Pathan	1e-05	0.056864	0.716699	1e-05	0.087202	1e-05	0.02921	0.056867	0.053119	1e-05
Pathan	1e-05	0.071351	0.645158	1e-05	0.13632	1e-05	0.026726	0.056463	0.063941	1e-05
Pathan	1e-05	0.068216	0.62515	1e-05	0.092217	1e-05	0.021686	0.080212	0.112478	1e-05
Pathan	1e-05	0.066136	0.689927	0.009675	0.095718	1e-05	0.026575	0.068233	0.043707	1e-05
Sindhi	0.005514	0.030256	0.808158	0.016003	0.011817	0.042347	0.000981	0.05873	1e-05	0.026184
Sindhi	1e-05	0.044904	0.773431	1e-05	0.0834	1e-05	0.011368	0.071847	0.015011	1e-05
Sindhi	1e-05	0.041747	0.776901	1e-05	0.059259	1e-05	0.014555	0.076871	0.013127	0.01751
Sindhi	0.004641	0.07523	0.73706	0.021869	0.022417	0.026895	0.016613	0.071891	1e-05	0.023374
Sindhi	1e-05	0.062943	0.741569	1e-05	0.053781	1e-05	1e-05	0.092572	0.047617	0.001479
Sindhi	1e-05	0.016328	0.861383	0.033513	0.002016	1e-05	1e-05	0.083262	1e-05	0.003457
Sindhi	1e-05	0.057612	0.736235	1e-05	0.09859	1e-05	0.00554	0.078923	1e-05	0.02306
Sindhi	1e-05	0.062491	0.777905	1e-05	0.039203	1e-05	0.004684	0.089713	1e-05	0.025964
Sindhi	1e-05	0.058993	0.80742	0.005069	0.04809	1e-05	0.010061	0.070122	1e-05	0.000215
Sindhi	0.012486	0.029389	0.686556	1e-05	0.033261	0.123787	0.003681	0.060878	0.035786	0.014166
Sindhi	1e-05	0.063904	0.705423	1e-05	0.076836	1e-05	0.020706	0.077628	0.031237	0.024236
Sindhi	1e-05	0.057594	0.768079	1e-05	0.052213	1e-05	1e-05	0.08769	0.021631	0.012753
Sindhi	1e-05	0.079708	0.726648	1e-05	0.053684	1e-05	1e-05	0.080003	0.049157	0.010759
Sindhi	1e-05	0.042754	0.777831	0.012478	0.051754	1e-05	1e-05	0.093583	1e-05	0.021561
Sindhi	1e-05	0.077017	0.740868	0.025682	0.034576	1e-05	0.018866	0.098752	0.004209	1e-05
Sindhi	0.000969	0.0724	0.707154	1e-05	0.063778	1e-05	0.011389	0.068613	0.075666	1e-05
Sindhi	1e-05	0.065361	0.722744	1e-05	0.098921	1e-05	0.007437	0.090327	1e-05	0.015171
Sindhi	1e-05	0.056624	0.763449	1e-05	0.051357	1e-05	1e-05	0.088432	0.031304	0.008795
Sindhi	1e-05	0.057105	0.791288	0.022063	0.024363	1e-05	0.014925	0.083642	1e-05	0.006584
Sindhi	0.055551	0.027115	0.457694	0.006321	1e-05	0.365166	0.004128	0.043687	0.020557	0.019772
Sindhi	1e-05	1e-05	0.867179	0.001951	0.010129	1e-05	1e-05	0.016266	0.049476	0.054959
Sindhi	0.004386	0.04787	0.730865	0.029013	0.005062	0.07753	0.011761	0.071315	0.022187	1e-05
Sindhi	1e-05	0.073086	0.730336	0.005769	0.08399	1e-05	0.033956	0.061402	0.011431	1e-05
Sindhi	1e-05	0.031843	0.846893	0.003281	0.018501	1e-05	1e-05	0.069257	0.024769	0.005427
Sindhi	1e-05	0.018445	0.859157	0.017561	0.001819	1e-05	1e-05	0.100613	1e-05	0.002363
Balochi	1e-05	0.041154	0.805787	0.010943	0.009982	1e-05	0.013711	0.027085	0.091307	1e-05
Balochi	1e-05	1e-05	0.85549	1e-05	0.067128	1e-05	0.014443	0.000118	0.06122	0.001561
Balochi	0.009806	0.015417	0.658954	0.017595	1e-05	0.102036	0.009063	0.013395	0.128908	0.044816
Balochi	1e-05	1e-05	0.86624	1e-05	0.069593	1e-05	0.002334	0.008641	0.0518	0.001353
Balochi	1e-05	1e-05	0.842137	0.000205	0.030369	1e-05	1e-05	0.015164	0.060904	0.051181
Balochi	0.004109	0.033353	0.77684	0.017883	1e-05	1e-05	0.007344	0.027536	0.091658	0.041258
Balochi	1e-05	1e-05	0.795935	1e-05	0.015729	1e-05	0.006502	1e-05	0.144048	0.037735
Balochi	0.011866	0.035056	0.640088	1e-05	1e-05	0.08069	1e-05	0.02415	0.135144	0.072976
Balochi	1e-05	0.029328	0.76972	0.02215	0.01117	1e-05	0.009632	0.069151	0.06991	0.018919
Balochi	0.000733	0.017793	0.71424	1e-05	0.018649	0.041519	0.008538	0.009656	0.134237	0.054624
Balochi	0.000845	0.010438	0.743504	1e-05	0.000254	0.011113	0.007633	0.002239	0.13583	0.088133
Balochi	1e-05	1e-05	0.85855	1e-05	1e-05	1e-05	1e-05	0.003747	0.101865	0.035778
Balochi	1e-05	0.001433	0.762475	1e-05	1e-05	1e-05	0.002245	0.011179	0.151349	0.071279
Balochi	1e-05	0.016304	0.783479	0.020847	5.2e-05	1e-05	1e-05	0.010419	0.111255	0.057614
Balochi	1e-05	0.006777	0.820913	0.013622	0.007858	1e-05	1e-05	0.014758	0.100898	0.035144
Balochi	1e-05	0.058114	0.766224	1e-05	1e-05	0.012513	1e-05	0.039962	0.113252	0.009894
Balochi	1e-05	0.005157	0.742231	1e-05	0.032134	1e-05	0.034228	0.047154	0.101999	0.037066
Balochi	1e-05	0.040133	0.777753	0.005972	1e-05	1e-05	1e-05	0.051061	0.071551	0.053489
Balochi	1e-05	0.075153	0.737968	1e-05	0.01787	1e-05	0.016508	0.152451	1e-05	1e-05
Balochi	0.001534	0.028966	0.763366	0.009787	0.030521	1e-05	1e-05	0.041202	0.085301	0.039303
Balochi	1e-05	1e-05	0.845248	1e-05	0.004951	1e-05	0.000625	0.009081	0.091865	0.04819
Balochi	1e-05	1e-05	0.825723	1e-05	1e-05	1e-05	1e-05	0.013124	0.070936	0.090157
Balochi	0.002118	0.035308	0.74046	0.01983	0.015816	0.027037	0.004144	0.034833	0.089224	0.031232
Balochi	0.019118	0.022906	0.553529	0.002736	0.008889	0.142624	0.00963	0.021335	0.15937	0.059864
Balochi	1e-05	0.010604	0.772487	0.015553	1e-05	1e-05	0.006133	0.013477	0.118638	0.063078
Brahui	1e-05	0.016747	0.817923	1e-05	0.002215	1e-05	0.00362	0.015718	0.102127	0.04162
Brahui	0.002743	0.01121	0.831901	0.019286	1e-05	1e-05	1e-05	0.028317	0.05177	0.054743
Brahui	0.035555	0.007026	0.557695	0.020844	1e-05	0.210725	1e-05	0.021255	0.078023	0.068858
Brahui	1e-05	0.017842	0.800954	1e-05	0.01337	1e-05	1e-05	0.0232	0.103692	0.040902
Brahui	1e-05	0.003074	0.827372	0.000529	1e-05	1e-05	1e-05	0.018684	0.084704	0.065598
Brahui	1e-05	1e-05	0.84997	1e-05	1e-05	1e-05	1e-05	0.009607	0.083457	0.056907
Brahui	0.004176	0.018458	0.785437	0.017099	0.00479	0.00054	1e-05	0.016914	0.114241	0.038334
Brahui	1e-05	0.009827	0.808709	0.000828	1e-05	1e-05	0.034724	0.0012	0.078457	0.066225
Brahui	0.020813	0.011508	0.648332	1e-05	0.015726	0.110301	0.013819	0.025229	0.080449	0.073813
Brahui	1e-05	0.009716	0.815238	1e-05	1e-05	1e-05	1e-05	0.018786	0.107588	0.048622
Brahui	1e-05	0.008787	0.811256	1e-05	0.018494	1e-05	1e-05	0.029468	0.081915	0.050039
Brahui	1e-05	0.024409	0.792665	0.005577	0.000919	1e-05	0.00703	0.007932	0.098791	0.062656
Brahui	0.00524	0.020881	0.766724	0.013112	0.011815	0.015992	1e-05	0.056734	0.062701	0.04679
Brahui	1e-05	0.027577	0.800478	1e-05	1e-05	1e-05	1e-05	0.015422	0.117878	0.038594
Brahui	1e-05	0.02873	0.750596	1e-05	0.07199	1e-05	1e-05	0.0245	0.106068	0.018076
Brahui	1e-05	0.028716	0.690819	0.001409	0.025433	1e-05	0.034715	0.026318	0.139239	0.053331
Brahui	0.008456	0.01769	0.757525	1e-05	0.005256	0.019383	0.007619	0.011833	0.1164	0.055827
Brahui	0.002247	0.002234	0.821104	0.020244	1e-05	0.021393	0.005622	1e-05	0.083698	0.043437
Brahui	1e-05	0.003425	0.841959	1e-05	1e-05	1e-05	1e-05	0.012792	0.098297	0.043477
Brahui	1e-05	0.005343	0.783623	0.018509	0.002923	1e-05	0.000227	0.020428	0.116072	0.052855
Brahui	0.006243	0.016883	0.695806	0.010768	1e-05	0.041523	1e-05	0.017501	0.13655	0.074706
Brahui	1e-05	1e-05	0.855547	0.010158	1e-05	1e-05	1e-05	0.017079	0.097117	0.020048
Brahui	0.000251	0.012633	0.79502	0.013144	1e-05	0.014899	0.002688	0.030699	0.091577	0.039079
Brahui	1e-05	1e-05	0.822337	0.002802	0.001333	1e-05	1e-05	0.01239	0.113047	0.048051
Brahui	1e-05	1e-05	0.824354	1e-05	1e-05	1e-05	0.00893	1e-05	0.112606	0.05405
Makrani	1e-05	0.002876	0.750399	1e-05	1e-05	0.014703	1e-05	0.018963	0.160865	0.052154
Makrani	1e-05	0.01058	0.705132	0.018065	1e-05	0.016796	0.0023	0.007488	0.177797	0.061821
Makrani	0.00144	1e-05	0.777119	1e-05	1e-05	0.010662	0.013413	1e-05	0.139972	0.057354
Makrani	0.003992	0.023919	0.731685	1e-05	1e-05	0.034382	0.006257	1e-05	0.137099	0.062636
Makrani	0.01679	0.014811	0.715533	0.018556	1e-05	0.040279	0.001568	0.007004	0.12492	0.060528
Makrani	0.009815	0.029774	0.730998	0.010909	0.042331	0.056943	1e-05	0.070871	0.010196	0.038154
Makrani	1e-05	0.029	0.763288	0.003246	0.001967	1e-05	1e-05	0.010353	0.129114	0.063002
Makrani	0.021258	0.006097	0.567444	0.001904	1e-05	0.183343	0.002831	0.027244	0.125634	0.064234
Makrani	0.001695	0.019358	0.75196	0.005594	1e-05	0.020801	0.010053	1e-05	0.119473	0.071047
Makrani	0.0118	0.027822	0.66453	1e-05	1e-05	0.059244	1e-05	0.011465	0.13142	0.093688
Makrani	0.003578	0.044375	0.761359	0.008901	0.020771	0.041818	0.015269	0.058358	0.029594	0.015978
Makrani	1e-05	1e-05	0.816556	1e-05	1e-05	1e-05	0.0111	1e-05	0.118789	0.053494
Makrani	0.03961	0.030403	0.408972	0.006373	0.014965	0.350677	0.012111	0.022595	0.058871	0.055422
Makrani	1e-05	0.013993	0.755038	1e-05	1e-05	0.025157	1e-05	0.005501	0.126744	0.073526
Makrani	1e-05	0.022771	0.750677	0.017807	0.004996	0.010094	0.004962	0.018787	0.112028	0.057868
Makrani	0.009833	0.007592	0.732768	0.009291	0.010961	0.028876	1e-05	0.014789	0.099081	0.086799
Makrani	0.000266	0.019954	0.738651	0.017904	1e-05	0.032847	1e-05	0.014959	0.117832	0.057566
Makrani	0.007983	0.009863	0.734981	0.013453	1e-05	0.023778	0.021797	0.007975	0.135396	0.044764
Makrani	0.005042	1e-05	0.76378	0.029888	1e-05	0.034856	1e-05	0.016976	0.08988	0.059548
Makrani	0.017384	0.006083	0.658952	1e-05	1e-05	0.107526	0.009126	0.001197	0.128163	0.071549
Makrani	1e-05	1e-05	0.788881	1e-05	1e-05	0.021457	0.000934	1e-05	0.107896	0.080782
Makrani	1e-05	0.035873	0.671614	0.011304	0.036476	0.045862	1e-05	0.033461	0.07164	0.093752
Makrani	1e-05	0.000469	0.757549	0.000772	0.003497	0.014995	0.005309	0.001867	0.14871	0.066823
Makrani	0.004746	0.017785	0.708015	1e-05	0.010121	0.040056	1e-05	0.01235	0.131044	0.075863
Makrani	9.8e-05	1e-05	0.773778	1e-05	1e-05	0.030886	1e-05	1e-05	0.114926	0.080262
Hazara	1e-05	0.027841	0.272135	1e-05	0.080969	1e-05	0.247701	0.301254	0.070059	1e-05
Hazara	1e-05	0.042196	0.370986	1e-05	0.112216	1e-05	0.198771	0.18412	0.09167	1e-05
Hazara	1e-05	0.022292	0.26273	1.5e-05	0.078007	1e-05	0.288243	0.255845	0.092723	0.000125
Hazara	1e-05	1e-05	0.3216	1e-05	0.119499	1e-05	0.281155	0.233527	0.04417	1e-05
Hazara	1e-05	0.033843	0.319511	1e-05	0.096996	1e-05	0.219641	0.208547	0.121422	1e-05
Hazara	1e-05	0.006842	0.28852	1e-05	0.068366	1e-05	0.254821	0.28272	0.095268	0.003432
Hazara	1e-05	0.004245	0.324726	1e-05	0.135835	1e-05	0.260236	0.238773	0.036144	1e-05
Hazara	1e-05	0.018083	0.3528	1e-05	0.107599	1e-05	0.208065	0.248621	0.064793	1e-05
Hazara	1e-05	0.007945	0.2757	1e-05	0.109899	1e-05	0.269964	0.261967	0.074485	1e-05
Hazara	1e-05	0.025468	0.308693	1e-05	0.110789	1e-05	0.230886	0.264895	0.05923	1e-05
Hazara	1e-05	0.018104	0.304048	1e-05	0.084735	1e-05	0.293263	0.229481	0.065852	0.004488
Hazara	1e-05	0.019854	0.301451	1e-05	0.076953	1e-05	0.262664	0.266598	0.07244	1e-05
Hazara	1e-05	0.031647	0.300196	1e-05	0.076315	1e-05	0.221601	0.264472	0.105729	1e-05
Hazara	1e-05	0.031635	0.293376	1e-05	0.091174	1e-05	0.277496	0.251916	0.054363	1e-05
Hazara	1e-05	0.009572	0.2953	1e-05	0.109981	1e-05	0.236561	0.288548	0.059649	0.000359
Hazara	1e-05	0.013148	0.259287	1e-05	0.085463	1e-05	0.300725	0.282316	0.047975	0.011055
Hazara	1e-05	0.035615	0.285581	1e-05	0.085537	1e-05	0.232924	0.290481	0.069823	1e-05
Hazara	1e-05	0.033373	0.287286	1e-05	0.099048	1e-05	0.288504	0.254402	0.033713	0.003645
Hazara	1e-05	0.043638	0.355927	1e-05	0.106367	1e-05	0.128233	0.158292	0.168225	0.039288
Hazara	1e-05	0.021105	0.28741	1e-05	0.099276	1e-05	0.268796	0.266145	0.057228	1e-05
Hazara	1e-05	0.022144	0.326531	1e-05	0.07601	1e-05	0.260313	0.238345	0.076616	1e-05
Hazara	1e-05	0.024761	0.309748	1e-05	0.112859	1e-05	0.247833	0.248561	0.056199	1e-05
Hazara	1e-05	0.036668	0.238626	1e-05	0.094333	1e-05	0.272686	0.269553	0.088093	1e-05
Hazara	1e-05	0.016479	0.27272	1e-05	0.103684	1e-05	0.296552	0.24568	0.064845	1e-05
Kalash	1e-05	0.904851	0.095069	1e-05	1e-05	1e-05	1e-05	1e-05	1e-05	1e-05
Kalash	1e-05	0.999904	1e-05	1e-05	1e-05	1e-05	1.5e-05	1.1e-05	1e-05	1e-05
Kalash	1e-05	0.99991	1e-05	1e-05	1e-05	1e-05	1e-05	1e-05	1e-05	1e-05
Kalash	1e-05	0.999909	1e-05	1e-05	1.1e-05	1e-05	1e-05	1e-05	1e-05	1e-05
Kalash	1e-05	0.861239	0.138681	1e-05	1e-05	1e-05	1e-05	1e-05	1e-05	1e-05
Kalash	1e-05	0.99991	1e-05	1e-05	1e-05	1e-05	1e-05	1e-05	1e-05	1e-05
Kalash	1e-05	0.99991	1e-05	1e-05	1e-05	1e-05	1e-05	1e-05	1e-05	1e-05
Kalash	1e-05	0.847287	0.14661	1e-05	1e-05	1e-05	1e-05	0.006032	1e-05	1e-05
Kalash	1e-05	0.99991	1e-05	1e-05	1e-05	1e-05	1e-05	1e-05	1e-05	1e-05
Kalash	1e-05	0.99991	1e-05	1e-05	1e-05	1e-05	1e-05	1e-05	1e-05	1e-05
Kalash	1e-05	0.724436	0.227867	1e-05	0.036789	1e-05	1e-05	0.010849	1e-05	1e-05
Kalash	1e-05	0.99991	1e-05	1e-05	1e-05	1e-05	1e-05	1e-05	1e-05	1e-05
Kalash	1e-05	0.886947	0.112973	1e-05	1e-05	1e-05	1e-05	1e-05	1e-05	1e-05
Kalash	1e-05	0.99991	1e-05	1e-05	1e-05	1e-05	1e-05	1e-05	1e-05	1e-05
Kalash	1e-05	0.999908	1e-05	1e-05	1e-05	1e-05	1e-05	1.2e-05	1e-05	1e-05
Kalash	1e-05	0.789106	0.190277	1e-05	0.014396	1e-05	1e-05	0.006161	1e-05	1e-05
Kalash	1e-05	0.99991	1e-05	1e-05	1e-05	1e-05	1e-05	1e-05	1e-05	1e-05
Kalash	1e-05	0.99991	1e-05	1e-05	1e-05	1e-05	1e-05	1e-05	1e-05	1e-05
Kalash	1e-05	0.997747	0.002173	1e-05	1e-05	1e-05	1e-05	1e-05	1e-05	1e-05
Kalash	1e-05	0.934111	0.065809	1e-05	1e-05	1e-05	1e-05	1e-05	1e-05	1e-05
Kalash	1e-05	0.99991	1e-05	1e-05	1e-05	1e-05	1e-05	1e-05	1e-05	1e-05
Kalash	1e-05	0.559216	0.323005	1e-05	0.072326	1e-05	0.017481	0.025334	1e-05	0.002598
Kalash	1e-05	0.950438	0.049482	1e-05	1e-05	1e-05	1e-05	1e-05	1e-05	1e-05
Kalash	1e-05	0.951791	0.048129	1e-05	1e-05	1e-05	1e-05	1e-05	1e-05	1e-05
Kalash	1e-05	0.944979	0.054941	1e-05	1e-05	1e-05	1e-05	1e-05	1e-05	1e-05
Cambodian	1e-05	0.00252	0.012542	1e-05	1e-05	1e-05	1e-05	0.984868	1e-05	1e-05
Cambodian	1e-05	1e-05	0.132306	1e-05	1e-05	1e-05	1e-05	0.867614	1e-05	1e-05
Cambodian	1e-05	0.007938	0.075868	0.005714	1e-05	1e-05	1e-05	0.91042	1e-05	1e-05
Cambodian	1e-05	1.9e-05	0.146812	1e-05	1e-05	1e-05	1e-05	0.832623	1e-05	0.020485
Cambodian	0.001032	1e-05	0.079212	1e-05	1e-05	1e-05	1e-05	0.919685	1e-05	1e-05
Cambodian	0.005321	0.001984	0.119248	1e-05	1e-05	1e-05	1e-05	0.869138	1e-05	0.004259
Cambodian	1e-05	1e-05	0.125281	1e-05	1e-05	1e-05	1e-05	0.874639	1e-05	1e-05
Cambodian	0.000336	0.002397	0.144437	1e-05	1e-05	1e-05	1e-05	0.852771	1e-05	1e-05
Cambodian	0.004239	1e-05	0.138863	1e-05	1e-05	1e-05	1e-05	0.856828	1e-05	1e-05
Cambodian	0.003113	0.010712	0.143748	1e-05	1e-05	1e-05	1e-05	0.842367	1e-05	1e-05
Cambodian	1e-05	0.016116	0.087785	1e-05	1e-05	1e-05	1e-05	0.896029	1e-05	1e-05
North West Chinese	1e-05	0.000662	0.001207	1e-05	1e-05	1e-05	0.288809	0.709262	1e-05	1e-05
North West Chinese	1e-05	0.039955	0.197749	1e-05	0.118588	1e-05	0.221368	0.347835	0.064735	0.009739
North West Chinese	1e-05	1e-05	0.006597	1e-05	1e-05	1e-05	0.299227	0.676389	0.017727	1e-05
North West Chinese	1e-05	0.016284	0.26401	1e-05	0.143521	1e-05	0.212367	0.307401	0.051847	0.00454
North West Chinese	1e-05	0.004298	0.008853	1e-05	0.005166	1e-05	0.305514	0.648839	0.027291	1e-05
North West Chinese	1e-05	0.036358	0.203599	1e-05	0.099467	1e-05	0.202639	0.375244	0.082654	1e-05
North West Chinese	1e-05	1e-05	1e-05	1e-05	1e-05	1e-05	0.330275	0.669645	1e-05	1e-05
North West Chinese	1e-05	0.02799	0.28609	1e-05	0.130362	1e-05	0.19437	0.318512	0.040388	0.002258
North West Chinese	1e-05	1e-05	1.4e-05	1e-05	1e-05	1e-05	0.311558	0.688357	1e-05	1e-05
North West Chinese	1e-05	0.019023	0.186575	1e-05	0.112357	1e-05	0.34558	0.297952	0.028717	0.009767
North West Chinese	1e-05	1e-05	0.022885	1.1e-05	0.057373	1e-05	0.222035	0.679339	0.018317	1e-05
North West Chinese	1e-05	0.028798	0.270472	1e-05	0.127731	1e-05	0.144329	0.309756	0.118875	1e-05
North West Chinese	1e-05	0.040494	0.295095	1e-05	0.14981	1e-05	0.18672	0.241936	0.078072	0.007844
North West Chinese	1e-05	0.011696	0.037382	1e-05	0.14008	1e-05	0.254881	0.536272	0.019649	1e-05
North West Chinese	1e-05	0.030727	0.262046	1e-05	0.122128	1e-05	0.202003	0.305602	0.077455	1e-05
North West Chinese	1e-05	0.004918	1e-05	1e-05	1e-05	1e-05	0.257062	0.736234	0.001726	1e-05
North West Chinese	1e-05	0.054631	0.253317	1e-05	0.116028	1e-05	0.166857	0.305487	0.092966	0.010685
North West Chinese	1e-05	0.006204	0.052724	0.000585	1e-05	1e-05	0.157787	0.77833	0.00433	1e-05
North West Chinese	1e-05	1e-05	0.047216	1e-05	0.02553	1e-05	0.157827	0.760487	0.00095	0.00795
North West Chinese	1e-05	0.007304	0.018727	1e-05	1e-05	1e-05	0.176467	0.784584	0.012868	1e-05
North West Chinese	1e-05	0.000921	0.050357	1e-05	0.010893	1e-05	0.184822	0.729478	0.02349	1e-05
North West Chinese	1e-05	0.00565	0.040718	1e-05	0.021232	1e-05	0.150401	0.779395	0.002564	1e-05
North West Chinese	1e-05	1e-05	0.034417	1e-05	1e-05	1e-05	0.174491	0.776199	0.014834	1e-05
North West Chinese	1e-05	0.017695	0.025987	1e-05	0.043818	1e-05	0.154254	0.758196	1e-05	1e-05
North West Chinese	1e-05	0.002161	0.054579	1e-05	0.015086	1e-05	0.167844	0.754421	0.005869	1e-05
South Chinese	1e-05	1e-05	1e-05	1e-05	1e-05	1e-05	1e-05	0.99991	1e-05	1e-05
South Chinese	1e-05	1e-05	1e-05	1e-05	1e-05	1e-05	0.069305	0.930615	1e-05	1e-05
South Chinese	1e-05	1e-05	1e-05	1e-05	1e-05	1e-05	1e-05	0.99991	1e-05	1e-05
South Chinese	1e-05	1e-05	1e-05	1e-05	1e-05	1e-05	1e-05	0.99991	1e-05	1e-05
South Chinese	1e-05	1e-05	1e-05	1e-05	1e-05	1e-05	0.017684	0.982236	1e-05	1e-05
South Chinese	1e-05	1e-05	1e-05	1e-05	1e-05	1e-05	0.008725	0.991195	1e-05	1e-05
South Chinese	1e-05	1e-05	1e-05	1e-05	1e-05	1e-05	0.099864	0.900056	1e-05	1e-05
South Chinese	1e-05	1e-05	1e-05	1e-05	1e-05	1e-05	1e-05	0.99991	1e-05	1e-05
South Chinese	1e-05	1e-05	1e-05	1e-05	1e-05	1e-05	1e-05	0.99991	1e-05	1e-05
South Chinese	1e-05	1e-05	1.3e-05	1e-05	1e-05	1e-05	0.146554	0.853363	1e-05	1e-05
South Chinese	1e-05	1e-05	1e-05	1e-05	1e-05	1e-05	1e-05	0.99991	1e-05	1e-05
South Chinese	1e-05	1e-05	1e-05	1e-05	1e-05	1e-05	1e-05	0.99991	1e-05	1e-05
South Chinese	1.4e-05	0.000778	0.003971	1e-05	1e-05	1e-05	0.115259	0.879929	1e-05	1e-05
South Chinese	1e-05	1e-05	1e-05	1e-05	1e-05	1e-05	1e-05	0.99991	1e-05	1e-05
South Chinese	1.4e-05	1e-05	1e-05	1e-05	1e-05	1e-05	0.022425	0.977491	1e-05	1e-05
South Chinese	1e-05	1e-05	1e-05	1e-05	1e-05	1e-05	0.103051	0.896869	1e-05	1e-05
South Chinese	1e-05	1e-05	1e-05	1e-05	1e-05	1e-05	1e-05	0.99991	1e-05	1e-05
South Chinese	1e-05	1e-05	1e-05	1e-05	1e-05	1e-05	0.032983	0.966937	1e-05	1e-05
South Chinese	1e-05	1e-05	1e-05	1e-05	1e-05	1e-05	1e-05	0.99991	1e-05	1e-05
South Chinese	1e-05	1e-05	0.005273	1e-05	1e-05	1e-05	1e-05	0.994647	1e-05	1e-05
South Chinese	1e-05	1e-05	1e-05	1e-05	1e-05	1e-05	1e-05	0.99991	1e-05	1e-05
South Chinese	1e-05	1e-05	1e-05	1e-05	1e-05	1e-05	0.091835	0.908085	1e-05	1e-05
South Chinese	1e-05	1e-05	1e-05	1e-05	1e-05	1e-05	1e-05	0.99991	1e-05	1e-05
South Chinese	1e-05	1e-05	1e-05	1e-05	1e-05	1e-05	1e-05	0.99991	1e-05	1e-05
South Chinese	1e-05	1e-05	1e-05	1e-05	1e-05	1e-05	1e-05	0.99991	1e-05	1e-05
Han	1e-05	1e-05	1e-05	1e-05	1e-05	1e-05	1e-05	0.99991	1e-05	1e-05
Han	1e-05	1e-05	1e-05	1e-05	1e-05	1e-05	0.11224	0.88768	1e-05	1e-05
Han	1e-05	1e-05	1e-05	1e-05	1e-05	1e-05	1e-05	0.99991	1e-05	1e-05
Han	1e-05	0.004625	1e-05	1e-05	1e-05	1e-05	0.111077	0.884227	1e-05	1e-05
Han	1e-05	1e-05	1e-05	1e-05	1e-05	1e-05	1e-05	0.99991	1e-05	1e-05
Han	1e-05	1e-05	1e-05	1e-05	1e-05	1.6e-05	0.014834	0.98508	1e-05	1e-05
Han	1.1e-05	1e-05	1e-05	1e-05	1e-05	1e-05	1e-05	0.999909	1e-05	1e-05
Han	1e-05	1.2e-05	1e-05	1e-05	1e-05	1e-05	0.111198	0.888719	1e-05	1e-05
Han	1e-05	1e-05	1e-05	1e-05	1e-05	1e-05	0.016404	0.983516	1e-05	1e-05
Han	1e-05	1e-05	1e-05	1e-05	1e-05	1e-05	1e-05	0.99991	1e-05	1e-05
Han	1e-05	1e-05	1e-05	1e-05	1e-05	1e-05	1e-05	0.99991	1e-05	1e-05
Han	1e-05	1.5e-05	1e-05	1e-05	1e-05	1e-05	0.121143	0.874845	1e-05	0.003937
Han	1e-05	1e-05	1e-05	1e-05	1e-05	1e-05	0.032688	0.967232	1e-05	1e-05
Han	1e-05	1e-05	1e-05	1e-05	1e-05	1e-05	1e-05	0.99991	1e-05	1e-05
Han	1e-05	1e-05	1e-05	1e-05	1e-05	1e-05	1e-05	0.99991	1e-05	1e-05
Han	1e-05	1e-05	0.005824	1e-05	1e-05	1e-05	0.071948	0.922158	1e-05	1e-05
Han	1e-05	1e-05	1e-05	1e-05	1e-05	1e-05	0.014305	0.985615	1e-05	1e-05
Han	1e-05	1e-05	1e-05	1e-05	1e-05	1.1e-05	1e-05	0.999909	1e-05	1e-05
Han	1e-05	1e-05	1e-05	1e-05	1e-05	1e-05	0.009008	0.990912	1e-05	1e-05
Han	1e-05	0.012235	0.006282	1e-05	1e-05	1e-05	0.102107	0.87345	0.005876	1e-05
Han	1e-05	1e-05	1e-05	1e-05	1e-05	1e-05	0.034128	0.965792	1e-05	1e-05
Han	1e-05	1e-05	1e-05	1e-05	1e-05	1e-05	1e-05	0.99991	1e-05	1e-05
Han	1e-05	0.008275	0.00511	1e-05	1e-05	1e-05	0.102792	0.881792	0.001982	1e-05
Han	1e-05	1e-05	1e-05	1e-05	1e-05	1e-05	0.056715	0.943205	1e-05	1e-05
Han	1e-05	1e-05	1e-05	1e-05	1e-05	1e-05	1e-05	0.99991	1e-05	1e-05
North East Chinese	1e-05	1e-05	1e-05	1e-05	1e-05	1e-05	0.430842	0.569078	1e-05	1e-05
North East Chinese	1e-05	0.005269	1e-05	1e-05	0.001083	1e-05	0.208891	0.771959	0.012747	1e-05
North East Chinese	1e-05	1e-05	1e-05	1e-05	1e-05	1e-05	0.537583	0.462329	1.9e-05	1e-05
North East Chinese	1e-05	0.01025	1e-05	1e-05	1e-05	1e-05	0.399922	0.578297	0.000922	0.010559
North East Chinese	1e-05	0.012929	0.041605	1e-05	0.034489	1e-05	0.543878	0.36705	1e-05	1e-05
North East Chinese	1e-05	1e-05	1e-05	1e-05	1e-05	1e-05	0.375868	0.624052	1e-05	1e-05
North East Chinese	1e-05	1e-05	9.3e-05	1e-05	0.004116	1e-05	0.411016	0.579435	0.00529	1e-05
North East Chinese	1e-05	1e-05	0.021859	1e-05	1e-05	1e-05	0.251641	0.72643	1e-05	1e-05
North East Chinese	1e-05	1e-05	1.2e-05	1e-05	1.5e-05	1e-05	0.267553	0.73236	1e-05	1e-05
North East Chinese	1e-05	1e-05	1e-05	1e-05	1e-05	1e-05	0.559034	0.440886	1e-05	1e-05
North East Chinese	1e-05	1e-05	1e-05	1e-05	1e-05	1e-05	0.416415	0.583505	1e-05	1e-05
North East Chinese	1e-05	1e-05	1e-05	1e-05	1e-05	1e-05	0.732364	0.267556	1e-05	1e-05
North East Chinese	1e-05	1e-05	1e-05	1e-05	1e-05	1e-05	0.428381	0.571539	1e-05	1e-05
North East Chinese	1e-05	1e-05	1e-05	1e-05	1e-05	1e-05	0.518515	0.481405	1e-05	1e-05
North East Chinese	1e-05	1e-05	1e-05	1e-05	1e-05	1e-05	0.716751	0.283169	1e-05	1e-05
North East Chinese	1e-05	0.00037	0.011131	1e-05	0.00597	1e-05	0.296561	0.6775	0.008429	1e-05
North East Chinese	1e-05	1e-05	1e-05	1e-05	1e-05	1e-05	0.321866	0.678054	1e-05	1e-05
North East Chinese	1e-05	1e-05	1e-05	1e-05	1e-05	1e-05	0.388354	0.611566	1e-05	1e-05
North East Chinese	1e-05	1e-05	1e-05	1e-05	1e-05	1e-05	0.443589	0.556331	1e-05	1e-05
North East Chinese	1e-05	1e-05	0.015266	1e-05	0.019683	1e-05	0.246853	0.718138	1e-05	1e-05
North East Chinese	1e-05	1e-05	1e-05	1e-05	1e-05	1e-05	0.555957	0.443963	1e-05	1e-05
North East Chinese	1e-05	1e-05	1e-05	1e-05	1e-05	1e-05	0.645873	0.354047	1e-05	1e-05
North East Chinese	1e-05	1e-05	1e-05	1e-05	1e-05	1e-05	0.415968	0.583952	1e-05	1e-05
North East Chinese	1e-05	0.017739	0.025813	1e-05	0.018741	1e-05	0.566084	0.371573	1e-05	1e-05
North East Chinese	1e-05	1e-05	1e-05	1e-05	1e-05	1e-05	0.430766	0.569154	1e-05	1e-05
Japanese	1.1e-05	1e-05	1e-05	1e-05	1e-05	1.8e-05	0.133993	0.865919	1e-05	1e-05
Japanese	1.7e-05	1e-05	1e-05	1e-05	1e-05	1e-05	0.122681	0.877232	1e-05	1e-05
Japanese	1.1e-05	1e-05	1e-05	1e-05	1e-05	1e-05	0.085435	0.914484	1e-05	1e-05
Japanese	1e-05	1e-05	1e-05	1e-05	1e-05	1e-05	0.112174	0.887746	1e-05	1e-05
Japanese	1e-05	1e-05	1e-05	1e-05	1e-05	1e-05	0.130519	0.869401	1e-05	1e-05
Japanese	1e-05	1e-05	1e-05	1e-05	1e-05	1e-05	0.134056	0.865863	1e-05	1e-05
Japanese	1e-05	1e-05	1e-05	1e-05	1e-05	1e-05	0.122866	0.877054	1e-05	1e-05
Japanese	1.2e-05	1e-05	1e-05	1e-05	1e-05	1e-05	0.129239	0.870678	1e-05	1e-05
Japanese	1e-05	1e-05	1.1e-05	1e-05	1e-05	1e-05	0.136855	0.863064	1e-05	1e-05
Japanese	1.1e-05	1e-05	1e-05	1e-05	1e-05	1e-05	0.139341	0.860578	1e-05	1e-05
Japanese	1e-05	1e-05	1e-05	1e-05	1e-05	1e-05	0.107825	0.892095	1e-05	1e-05
Japanese	1.1e-05	1e-05	1e-05	1e-05	1e-05	1e-05	0.109201	0.890718	1e-05	1e-05
Japanese	1e-05	1e-05	1e-05	1e-05	1e-05	1e-05	0.111108	0.888812	1e-05	1e-05
Japanese	1e-05	1e-05	1e-05	1e-05	1e-05	1e-05	0.103942	0.895978	1e-05	1e-05
Japanese	1.1e-05	1e-05	1e-05	1e-05	1e-05	1e-05	0.135184	0.864735	1e-05	1e-05
Japanese	1.1e-05	1e-05	1e-05	1e-05	1e-05	1e-05	0.121273	0.878646	1e-05	1e-05
Japanese	1e-05	1e-05	1e-05	1e-05	1e-05	1e-05	0.119136	0.880784	1e-05	1e-05
Japanese	1e-05	1e-05	1e-05	1e-05	1e-05	1e-05	0.140324	0.859596	1e-05	1e-05
Japanese	1.7e-05	1e-05	1e-05	1e-05	1e-05	1.2e-05	0.111724	0.888186	1e-05	1e-05
Japanese	1e-05	1e-05	1e-05	1e-05	1e-05	1e-05	0.120446	0.879474	1e-05	1e-05
Japanese	1e-05	1e-05	1e-05	1e-05	1e-05	1.2e-05	0.136179	0.86374	1e-05	1e-05
Japanese	1e-05	1e-05	1e-05	1e-05	1e-05	1.1e-05	0.148454	0.851465	1e-05	1e-05
Japanese	1e-05	1e-05	1e-05	1e-05	1e-05	1.2e-05	0.120663	0.879255	1e-05	1e-05
Japanese	1e-05	1e-05	1e-05	1e-05	1e-05	1e-05	0.14038	0.85954	1e-05	1e-05
Japanese	1e-05	1e-05	1e-05	1e-05	1e-05	1e-05	0.143184	0.856736	1e-05	1e-05
Yakut	1e-05	1e-05	1e-05	1e-05	1e-05	1e-05	0.99991	1e-05	1e-05	1e-05
Yakut	1e-05	0.015009	0.005613	1e-05	0.049989	1e-05	0.929329	1e-05	1e-05	1e-05
Yakut	1e-05	1e-05	1e-05	1e-05	1e-05	1e-05	0.981673	1e-05	0.018247	1e-05
Yakut	1e-05	1e-05	1e-05	1e-05	1e-05	1e-05	0.917997	0.081923	1e-05	1e-05
Yakut	1e-05	0.012279	0.00375	1e-05	0.023482	1e-05	0.932309	1e-05	0.02813	1e-05
Yakut	1e-05	1e-05	1e-05	1e-05	1e-05	1e-05	0.99991	1e-05	1e-05	1e-05
Yakut	1e-05	0.020683	0.06521	1e-05	0.187615	1e-05	0.700946	0.025495	1e-05	1e-05
Yakut	1e-05	1e-05	1e-05	1e-05	1e-05	1e-05	0.99991	1e-05	1e-05	1e-05
Yakut	1e-05	0.00611	1e-05	1e-05	0.083993	1e-05	0.909827	1e-05	1e-05	1e-05
Yakut	1e-05	1e-05	1e-05	1e-05	1e-05	1e-05	0.99991	1e-05	1e-05	1e-05
Yakut	1e-05	1e-05	1e-05	1e-05	1e-05	1e-05	0.99991	1e-05	1e-05	1e-05
Yakut	1e-05	1e-05	1e-05	1e-05	1e-05	1e-05	0.99991	1e-05	1e-05	1e-05
Yakut	1e-05	1e-05	0.063332	1e-05	0.113655	1e-05	0.822943	1e-05	1e-05	1e-05
Yakut	1e-05	1e-05	1e-05	1e-05	1e-05	1e-05	0.99991	1e-05	1e-05	1e-05
Yakut	1e-05	1e-05	1e-05	1e-05	1e-05	1e-05	0.99991	1e-05	1e-05	1e-05
Yakut	1e-05	1e-05	1e-05	1e-05	9.6e-05	1e-05	0.999824	1e-05	1e-05	1e-05
Yakut	1e-05	0.008593	0.00127	1e-05	1e-05	1e-05	0.98729	1e-05	0.002787	1e-05
Yakut	1e-05	1e-05	1e-05	1e-05	1e-05	1e-05	0.99991	1e-05	1e-05	1e-05
Yakut	1e-05	1e-05	1e-05	1e-05	1e-05	1e-05	0.99991	1e-05	1e-05	1e-05
Yakut	1e-05	1e-05	1e-05	1e-05	1e-05	1e-05	0.99991	1e-05	1e-05	1e-05
Yakut	1e-05	0.006737	1e-05	1e-05	0.035033	1e-05	0.95816	1e-05	1e-05	1e-05
Yakut	1e-05	1e-05	1e-05	1e-05	1e-05	1e-05	0.99991	1e-05	1e-05	1e-05
Yakut	1e-05	0.018278	0.003899	1e-05	0.041315	1e-05	0.934755	0.001704	1e-05	1e-05
Yakut	1e-05	1e-05	1e-05	1e-05	1e-05	1e-05	0.99991	1e-05	1e-05	1e-05
Yakut	1e-05	0.01274	0.068875	1e-05	0.223848	1e-05	0.685044	0.009444	1e-05	1e-05

## Sheet: Standard Errors
Table S3b: Estimation of standard errors in table S2a using 200 bootstrap replicates
	Standard errors to table S2
Samples	1	2	3	4	5	6	7	8	9	10
San	0.015757	0	0	0	0	0.015757	0	0	0	0
San	0.014598	0	0	0	0	0.014598	0	0	0	0
San	0.015568	0	0	0	0	0.015568	0	0	0	0
San	0.013475	0	0	0	0	0.013475	0	0	0	0
San	0	0	0	0	0	0	0	0	0	0
San	0.004401	0.000736	0.000591	0.007872	2.3e-05	0.008387	0.000786	0.000998	0.00444	0.002088
Mbuti Pygmy	0.006742	0.000132	2.9e-05	0.001704	0	0.007081	0.00014	0.000819	0	0
Mbuti Pygmy	0.00722	0	0	0	0	0.00722	0	0	0	0
Mbuti Pygmy	0.014442	0	0	0	0	0.014442	0	0	0	0
Mbuti Pygmy	0.015958	0	0	0	0	0.015958	0	0	0	0
Mbuti Pygmy	0.014044	0	0	0	0	0.014044	0	0	0	0
Mbuti Pygmy	0.001747	0	0	0	0	0.001747	0	0	0	0
Mbuti Pygmy	0	0	0	0	0	0	0	0	0	0
Mbuti Pygmy	0.003927	0	0	0.000363	0	0.003953	0	0	0	0
Mbuti Pygmy	0.001668	0.001987	0.001784	0.00332	0.000503	0.007193	0.000527	1.4e-05	0.001425	0.006622
Mbuti Pygmy	0.007331	0	0	0	0	0.007331	0	0	0	0
Mbuti Pygmy	0.007312	0	0	0	0	0.007312	0	0	0	0
Mbuti Pygmy	0.007291	0.00013	0	0.007109	0	0.009133	0.001557	0.001515	0	0.006696
Mbuti Pygmy	0.019094	0	0	0	0	0.018872	0	0.001035	0	0.005803
Mbuti Pygmy	0.007576	0	0.00021	0	0	0.007582	0.000146	0	0	0
Mbuti Pygmy	0.000606	0.000612	0.008728	0.022244	0.015462	0.010847	0.001913	0.002787	0.021638	0.01694
Biaka Pygmy	0.003147	0.00196	0.005149	0.036765	0.012446	0.010076	0.001422	0.000581	0.025326	0.021423
Biaka Pygmy	0.004585	0.00611	0.01268	0.015835	0.014088	0.011515	0.006263	0.003839	0.021621	0.019116
Biaka Pygmy	0	0.001038	0	0.002972	0.008925	0	0	0	0.011802	0.015817
Biaka Pygmy	0.002303	0.004849	0.013738	0.016416	0.015982	0.009325	0.00579	0.003563	0.025352	0.020681
Biaka Pygmy	0.003794	0.006857	0.013638	0.015666	0.013866	0.008324	0.002471	0.002495	0.023751	0.017059
Biaka Pygmy	0.000794	0.006496	0.014157	0.009475	0.007489	0.003944	0.000918	0.001544	0.022665	0.020412
Biaka Pygmy	0.002256	0.008996	0.014712	0.012523	0.007757	0.005863	0.004814	0.002823	0.021751	0.019632
Biaka Pygmy	0.00177	0.011304	0.017699	0	0	0.004425	0.004958	0.006595	0.022173	0.021839
Biaka Pygmy	0.00315	0.005614	0.015011	0.01239	0.005926	0.005447	0.004582	0.003781	0.022946	0.01831
Biaka Pygmy	0.002582	0.00689	0.014598	0.013855	0.013102	0.006496	0.004507	0.000369	0.021561	0.017701
Biaka Pygmy	0.001876	0.008912	0.015769	0.014475	0.006968	0.00596	0.002606	0.000468	0.021078	0.017184
Biaka Pygmy	0.001558	0.003773	0.01428	0.013812	0.016107	0.006463	0.001583	0.002606	0.022712	0.019559
Biaka Pygmy	0.002481	0.009019	0.015325	0.013702	0.011827	0.008166	0.003077	0.003859	0.022366	0.020079
Biaka Pygmy	0.002297	0.008039	0.015196	0.012971	0.014813	0.007868	0.002939	0.005145	0.021556	0.017953
Biaka Pygmy	4.4e-05	0.010389	0.015146	0.005718	0.010669	0	0.006838	0.008216	0.020205	0.016691
Biaka Pygmy	0.002687	0.008553	0.015996	0.010578	0	0.001935	0.003251	0.006991	0.018067	0.016485
Biaka Pygmy	0	0.009764	0.016584	0.009974	0.012658	0	0.009695	0.009194	0.019285	0.011477
Biaka Pygmy	0	0.00284	0.018921	0.007116	0.02108	0	0.007283	0.005768	0.026254	0.013504
Biaka Pygmy	0	0.009913	0.016325	0	0.014273	0	0.015999	0.015339	0.015915	0.00534
Biaka Pygmy	0.007114	0	0	0	0	0.007114	0	0	0	0
Biaka Pygmy	0.008747	0	0	0.005127	0	0.011533	0.000958	0.00302	0	0.007749
Biaka Pygmy	0	0.008359	0.004107	0.032295	0.006286	0.003524	0	0	0.024252	0.020311
Biaka Pygmy	0.00478	0.002211	0.003248	0.050032	0.006743	0.019524	0.000592	0.000685	0.025483	0.020124
Biaka Pygmy	0	0	0	0	0	0	0	0	1.3e-05	1.3e-05
Biaka Pygmy	0.003705	0.003431	0.004815	0.004599	0.003176	0.004244	0	0	0.02338	0.027285
Bantu	0.002244	0.01018	0.016516	0.016405	0.010147	0.008254	0.004906	0.003769	0.029334	0.026259
Bantu	0.005048	0.004591	0.013052	0.01427	0.006923	0.010787	0.002045	0.001027	0.021658	0.019454
Bantu	0.001142	0.006808	0.015158	6e-06	0	0.004954	0.003852	0.002603	0.022094	0.021978
Bantu	0.004121	0.006271	0.014564	0.008801	0.003548	0.00612	0.003995	0.00429	0.023106	0.019875
Bantu	0.002841	0.008138	0.015954	0.011335	0.006934	0.005201	0.004204	0.005759	0.02041	0.01797
Bantu	0.000931	0.011084	0.017044	0.012019	0	0.001641	0.002774	0.002723	0.023757	0.022155
Bantu	0.001687	0.008733	0.014925	0.014306	0.012986	0.007355	0.003043	0.005013	0.021036	0.018248
Bantu	0.002305	0.009307	0.017805	0.013968	0.015239	0.006488	0.001324	0.004377	0.022775	0.018235
Bantu	0.003744	0.007632	0.015422	0.014795	0.01505	0.007843	0.003996	0.00256	0.023489	0.019885
Bantu	0.002199	0.009295	0.013731	0.013677	0.01347	0.006588	0.003119	0.001944	0.02095	0.017381
Bantu	0.003366	0.011237	0.017654	0.016674	0.016804	0.008961	0.003883	0.003649	0.030619	0.029569
Bantu	0.005932	0.008529	0.019238	0.013727	0.005653	0.015828	0.006019	0.008277	0.018219	0.016515
Bantu	0	0.009115	0.016665	0.00274	0.01353	0	0.003976	0.007416	0.020405	0.015749
Bantu	0.004901	0.00872	0.015543	0.011655	0.003536	0.010297	0.008239	0.0091	0.018428	0.016706
Bantu	0	0.003033	0.019406	0.005034	0.02095	0	0.006436	0.006604	0.026776	0.013063
Bantu	0.000895	0.010758	0.017913	0.000766	0.014397	0	0.014371	0.013738	0.017185	0.002821
Bantu	0.015626	0	0	0	0	0.015626	0	0	0	0
Bantu	0.014648	0	0	0	0	0.014648	0	0	0	0
Bantu	0.000546	0	0	0	0	0.000546	0	0	0	0
Bantu	0	0	0	0	0	0	0	0	0	0
Yoruba	0.000196	0	0	4.6e-05	0	0.000201	0	0	0	0
Yoruba	0.006468	0	0.000144	0.00557	0	0.008872	0	0	0.00225	0.001099
Yoruba	0.007367	0	0	0	0	0.007367	0	0	0	0
Yoruba	0.007037	0	0	0	0	0.007037	0	0	0	0
Yoruba	0.008497	0.002569	0	0	0	0.010447	0.001463	0.002023	0	0.005798
Yoruba	0.017156	3e-05	0	0.000219	0	0.016097	0.000198	0.000188	0	0.006126
Yoruba	0.007056	0.001512	0.004876	0.039771	0.006496	0.007862	0.000544	3e-06	0.026032	0.022393
Yoruba	0.000948	0.000501	0	0.016548	0.003597	0	0	0	0.014479	0.004104
Yoruba	0.000559	0.000598	0.001282	0.003748	0.001186	0.000246	0.000509	0	0.000657	0.002042
Yoruba	0.004559	0.009945	0.016011	0.015886	0.013413	0.007753	0.0035	0.0056	0.01981	0.017322
Yoruba	0.000781	0.001848	0.013575	0.009115	0.01067	0	0.000696	0	0.024853	0.027781
Yoruba	0.003557	0.008762	0.016327	0.014167	0.015946	0.008282	0.003882	0.005616	0.0246	0.020946
Yoruba	0.00338	0.007627	0.015854	0.003188	0.00043	0.003159	0.000911	0.004778	0.021767	0.021334
Yoruba	0.001605	0.01054	0.017694	0.010076	0.008397	0.002903	0.004972	0	0.022134	0.018678
Yoruba	0.00305	0.010693	0.017221	0.000732	0	0.004842	0.006811	0.006242	0.019995	0.018236
Yoruba	0.001786	0.008865	0.013766	0.01113	0.013357	0.000734	0.005153	0.003774	0.021	0.018885
Yoruba	0.002952	0.008874	0.015908	0.01419	0.012787	0.008246	0.001931	0.00024	0.024401	0.018389
Yoruba	0.002424	0.005791	0.015431	0.013218	0.013637	0.008031	0.00279	0.001142	0.023001	0.019135
Yoruba	0.017689	0	0	0	0	0.017689	0	0	0	0
Yoruba	0.018711	0	0	0	0	0.018711	0	0	0	0
Yoruba	0	0	0	0	0	0	0	0	0	0
Yoruba	0.01265	0	0	0	0	0.01265	0	0	0	0
Yoruba	0.004137	0.000193	0	0.00662	0	0.008515	0.000282	0.000761	0	0.000227
Yoruba	3.4e-05	0	0	0.002506	0	0.002505	0	0	0	0
Mandenka	0.006871	0	0	0	0	0.006871	0	0	0	0
Mandenka	0.006921	0	0	0	0	0.006921	0	0	0	0
Mandenka	0.008437	0.000591	0	0.008316	0	0.011331	0.000645	0.002098	0.000296	0.008659
Mandenka	0.017692	0	0	0.000494	0	0.016468	0	0.000718	0	0.006254
Mandenka	2.7e-05	0.001116	0.001411	0.010678	0	0.000502	3.7e-05	0	0.010008	0
Mandenka	0.00071	0.002268	0.013088	0.044884	0.010755	0.012014	0.000112	0	0.023135	0.020851
Mandenka	0.000301	0.00248	0.001796	0.022461	0.005684	0.000692	0.000911	0	0.02031	0.000421
Mandenka	0.001088	0.005573	0.016286	0.015204	0.013162	0.007909	0.002614	0.003293	0.023217	0.022375
Mandenka	0.003025	0.009845	0.017533	0.016965	0.015765	0.007871	0.004962	0	0.02526	0.026221
Mandenka	0.004861	0.008453	0.015179	0.013977	0.011167	0.008215	0.005651	0.004365	0.021286	0.020227
Mandenka	0	0.004401	0.000716	0	0.01088	0	0.000112	0.001662	0.029651	0.029317
Mandenka	0.003157	0.008336	0.014375	0.011174	0	0.006483	0.002463	0.002494	0.022383	0.022382
Mandenka	0.003296	0.008972	0.017006	0.012261	0.011427	0.005026	0.003601	0.003506	0.023153	0.01956
Mandenka	0.003703	0.009101	0.01447	0.01094	0.004594	0.004654	0.004855	0.005355	0.020355	0.016573
Mandenka	0.004598	0.004261	0.016153	0.015705	0.010622	0.008169	0.00224	0.002626	0.023045	0.021561
Mandenka	0.000281	0.010441	0.015462	0.013615	0.012585	0.006613	0.003278	0.003787	0.021041	0.018985
Mandenka	0.017691	0	0	0	0	0.017691	0	0	0	0
Mandenka	0.016275	0	0	0	0	0.016275	0	0	0	0
Mandenka	0.015177	0	0	0	0	0.015177	0	0	0	0
Mandenka	0.003403	0	0	0	0	0.003403	0	0	0	0
Mandenka	0	0	0	0.001979	0	0.003279	5.5e-05	0.000162	0.002037	0.002038
Mandenka	0.006922	0	0	0.006172	0	0.009756	0	0	0	0
Mandenka	0.006959	0	0	0	0	0.006959	0	0	0	0
Mandenka	0.016294	0	0	0.000917	0	0.015769	0.00033	0.000617	0	0.005877
Mozabite	0.007062	0	0	0	0	0.007062	0	0	0	0
Mozabite	0.007713	0	0	0.002084	0	0.008777	0.00238	0.001211	0	0.00552
Mozabite	0.019294	0	0	0.000509	0	0.019264	9.6e-05	0	0	0.005516
Mozabite	0.003041	0.008921	0.009436	0.027968	0.014628	0.01301	0.002512	0.000513	0.022048	0.016255
Mozabite	0	0	0.001915	0.005235	0	0	0	0	0.000701	0.004308
Mozabite	0.001391	0.001351	0.006331	0.030328	0	0.005602	0.00042	0.000283	0.024973	0.010353
Mozabite	0.002933	0.009982	0.017104	0.017276	0.013124	0.007792	0.005289	0.002552	0.025273	0.025978
Mozabite	0.00295	0.008064	0.004604	0	0.009718	0.011756	6.2e-05	0	4.3e-05	0.019798
Mozabite	0.005975	0.003575	0.015198	0.014387	0.015778	0.01028	0.003044	0.000602	0.024368	0.020222
Mozabite	0	0	0	0	0	0	0	1e-06	0	1e-06
Mozabite	0.003369	0.009163	0.014311	0.014069	0.007597	0.005113	0.004636	0.000561	0.022431	0.0195
Mozabite	0.003346	0.009703	0.018032	0.01455	0.00607	0.005606	0.005514	0	0.025738	0.021107
Mozabite	0.00165	0.010225	0.01618	0.00662	0	0.005397	0.005184	0.001111	0.022703	0.020351
Mozabite	0.002307	0.009029	0.016735	0.007002	0.006447	0.004281	0.004373	0.001167	0.020886	0.019353
Mozabite	0.003892	0.009342	0.017396	0.013638	0.013294	0.007377	0.00246	0.001296	0.024064	0.022418
Mozabite	0.003259	0.009921	0.015502	0.01422	0.015555	0.008466	0.001734	0.003393	0.020202	0.019901
Mozabite	0.014904	0	0	0	0	0.014904	0	0	0	0
Mozabite	0.016142	0	0	0	0	0.016142	0	0	0	0
Mozabite	0.015927	0	0	0	0	0.015927	0	0	0	0
Mozabite	0.000473	0	0	0	0	0.000473	0	0	0	0
Mozabite	0.002268	0	0	0.001516	0	0.002813	0.000286	0	0	0
Mozabite	0	0	0	0.00828	0	0.008326	0	0	0.001601	0.004928
Mozabite	0.004281	0	0	0	0	0.004281	0	0	0	0
Mozabite	0.007625	0	0	0	0	0.007625	0	0	0	0
Mozabite	0.00679	0	0	0	0	0.00679	0	0	0	0
Moroccan	0.008418	0	0	0.008966	0	0.011227	0.00258	0.004015	0	0.009596
Moroccan	0.013288	0	0	0	0	0.013448	0.000781	0.000577	0	0.001295
Moroccan	0.005035	0.002779	0.00946	0.027814	0.016341	0.011292	0.000337	0	0.022951	0.018665
Moroccan	0.000594	0.001557	0	0.01543	0	0.000939	0	0	0.004362	0.014209
Moroccan	0	0	0	0	0	0	0	0	0	0
Moroccan	0	0	0	0	0	0	0	0	0	0
Moroccan	0.003124	0.009646	0.016234	0.01623	0.016635	0.008134	0.004884	0.001675	0.029186	0.026815
Moroccan	0.004022	0.005083	0.013772	0.015144	0.017785	0.008009	0.00316	0.00252	0.02632	0.025256
Moroccan	0	0.00188	0.003007	0	0.012129	0	0	0	0.027689	0.030422
Moroccan	0.002467	0.003624	0.015533	0.011509	0.001538	0.003807	0.00481	0.003428	0.020827	0.018135
Egyptian	0.001947	0.010302	0.01549	0.010213	0	0.005204	0.003773	0.002958	0.023028	0.023583
Egyptian	0.001609	0.009804	0.014852	0.014545	0.011607	0.004549	0.002316	0.00423	0.019467	0.019139
Egyptian	0.000287	0.008448	0.014865	0.011476	0.012244	0.001174	0.002289	0.001985	0.021146	0.018328
Egyptian	0.003343	0.008537	0.015076	0.013898	0.012978	0.008385	0.003982	0.001809	0.020816	0.017309
Egyptian	0.005732	0.006565	0.016294	0.014339	0.010181	0.012048	0.005546	0.003583	0.022762	0.017768
Egyptian	0.007381	0	0	0	0	0.007381	0	0	0	0
Egyptian	0.014686	0	0	0	0	0.014686	0	0	0	0
Egyptian	0.015599	0	0	0	0	0.015599	0	0	0	0
Egyptian	0.017797	0	0	0	0	0.017797	0	0	0	0
Egyptian	0.004008	0	0	0	0	0.004008	0	0	0	0
Egyptian	0.007377	0.000559	0.00067	0.007099	0.000185	0.011242	0	9.6e-05	0.001724	0.000799
Egyptian	0.002271	0	0	0.008362	0	0.007137	0.000608	0.000385	0.000162	0.005068
Ethiopian	0.002775	0	0	0	0	0.002775	0	0	0	0
Ethiopian	0.007327	0	0	0	0	0.007327	0	0	0	0
Ethiopian	0.008053	4.4e-05	0.000655	0.00609	0	0.01055	0.001144	0.002039	0	0.009725
Ethiopian	0.011547	0	0	0	0	0.011547	0	0	0	0.000132
Ethiopian	0.003481	0.000612	0	0.014735	0	0.014165	0	0	0	0
Ethiopian	0.002634	0.004702	0.000449	0.023214	0	0.007352	0	0	0.005219	0.015141
Ethiopian	0	0	0	0	0	0	0	0	0	0
Ethiopian	0.004804	0.008262	0.016179	0.01609	0.013739	0.010369	0.001462	0.003031	0.029817	0.024796
Ethiopian	0.004371	0.006201	0.016865	0.017144	0.015812	0.008892	0.003118	0.002042	0.022243	0.018541
Ethiopian	0.003455	0.00855	0.016693	0.01349	0.014449	0.005569	0.004063	0.000552	0.021842	0.02052
Ethiopian	0.003221	0.009804	0.014674	0	0	0.00501	0.005402	0.003122	0.020928	0.020736
Ethiopian	0.003507	0.004541	0.015837	0.013694	0.014563	0.007026	0.003382	0.00425	0.023104	0.019084
Ethiopian	0.003823	0.011662	0.018804	0.017444	0.012052	0.007365	0.002959	0.002851	0.026811	0.02758
Ethiopian	0.015466	0	0	0	0	0.015466	0	0	0	0
Ethiopian	0.015372	0	0	0	0	0.015372	0	0	0	0
Ethiopian	0.016327	0	0	0	0	0.016327	0	0	0	0
Ethiopian	0	0	0	0	0	0	0	0	0	0
Ethiopian	0.003026	0	0	0.001601	0	0.00352	0	0	0	0.000285
Ethiopian	0	0	0	0	0	0	0	0	0	0
Yemeni	0	0	0	0	0	0	0	0	0	0
Yemeni	0.006327	0	0	0	0	0.006327	0	0	0	0
Yemeni	0.008219	0	0	0	0	0.010511	0.000645	0.000136	0	0.005428
Yemeni	0.01098	0.000606	0.000471	0.000387	0	0.011708	0.001218	0.000903	0	0.003609
Yemeni	0.002257	0.004207	0.005135	0.022836	0.015943	0.01199	0.004848	0.001819	0.021944	0.019377
Yemeni	0.006353	0.001492	0.00644	0.024132	0.011172	0.01799	0.001225	0.00075	0.021053	0.015054
Yemeni	0.003138	0.010119	0.015341	0.013406	0.013312	0.008533	0.00698	0.006138	0.020481	0.017595
Yemeni	0.004109	0.010189	0.016278	0.015451	0.011789	0.00755	0.001966	0.003224	0.030102	0.030021
Yemeni	0.016217	0	0	0	0	0.016217	0	0	0	0
Yemeni	0.015425	0	0	0	0	0.015425	0	0	0	0
Saudi	0	0	0	0	0	0	0	0	0	0
Saudi	0.003229	0	0	0.006198	0	0.006906	1e-06	0	1.2e-05	0.001733
Saudi	0.005224	0	0.000156	0.007796	0	0.008211	0.000386	0.000819	0.001173	0.004858
Saudi	0	0	0	0	0	0	0	0	0	0
Saudi	0.007334	0	0	0.000152	0	0.007317	0	0	0	0
Saudi	0.004461	0.009001	0.015886	0.010604	0.01174	0.008053	0.002829	0.004413	0.020274	0.017924
Saudi	0.004936	0.010897	0.015647	0.016507	0.00852	0.00838	0.003022	0.001455	0.027882	0.029845
Saudi	0.003839	0.006901	0.0141	0.012956	0.01489	0.007104	0.005318	0.005712	0.019229	0.017225
Saudi	0.000647	0.008	0.017194	0.007455	0.010175	0.000586	0.004031	0.006855	0.018338	0.016464
Saudi	0	0.002934	0.015307	0.008535	0.007808	0	0.001924	0.005633	0.018211	0.01366
Saudi	0.00316	0.010424	0.016154	0.010769	0.011133	0.004149	0.005346	0.007143	0.021154	0.015845
Saudi	0	0.006675	0.016655	0.00896	0.016131	0.000253	0.005592	0.006966	0.020866	0.01588
Saudi	0.00356	0.012035	0.018395	0.010911	0.007599	0.003271	0.009094	0.010133	0.020862	0.017945
Saudi	0	0	0	0	0	0	0	0	0	0
Saudi	6.3e-05	0	0	0.000154	0	0.000326	0	2.7e-05	0	0.000281
Saudi	0.008145	0	0	0.00053	0	0.008256	0	0	0	0
Saudi	0.007333	0	0	0	0	0.007333	0	0	0	0
Saudi	0.006964	0	0	0	0	0.006964	0	0	0	0
Saudi	0.000416	0.009356	0.017639	0.008657	0.00406	0.000239	0.008389	0.005834	0.017765	0.015298
Saudi	0.005223	0.00996	0.018021	0.007523	0.012055	0.011821	0.009634	0.010651	0.022937	0.017054
Bedouin	0	0.000989	0.015029	0	0.015157	0	0.00571	0.003463	0.023106	0.014922
Bedouin	0.005514	0.010403	0.017696	0.004446	0.007049	0.008931	0.005487	0.007235	0.018102	0.015289
Bedouin	0	0.009219	0.01473	0.002251	0.014083	0	0.015887	0.015466	0.016485	0.007372
Bedouin	0	0.005681	0.016968	0	0.02031	0	0.019467	0.018553	0.020282	0.002118
Bedouin	0.002866	0	0	0	0	0.002866	0	0	0	0
Bedouin	0.004039	0	0	0.003368	0	0.005488	0	8.5e-05	0	0.000872
Bedouin	0.005868	1e-06	0	0.003803	0	0.007523	0.000158	0.000175	0.000228	6e-06
Bedouin	0	0	0	0	0	0	0	0	0	0
Bedouin	0.000202	0.008819	0.017146	0.005224	0.005224	0	0.003336	0.006291	0.018197	0.016227
Bedouin	0.000969	0.008762	0.017499	0.001812	0.015495	0	0.004538	0.006995	0.022313	0.016091
Bedouin	0.000727	0.009533	0.015138	0.012869	0.012652	0.001472	0.009794	0.011244	0.02126	0.014691
Bedouin	0.002293	0.009732	0.017421	0.007865	0.014991	0.007604	0.007587	0.007379	0.023289	0.015707
Bedouin	0	0.009703	0.015534	0	0.015573	0	0.015724	0.015136	0.017323	0.005288
Bedouin	0	0	0	0	0	0	0	0	0	0
Bedouin	0.005895	0	0	0.004737	0	0.008064	1.1e-05	0	0	0.000407
Bedouin	0.008527	0	0	0	0	0.008527	0	0	0	0
Bedouin	0.018545	0	0	0	0	0.017751	0	0.000144	0	0.006524
Bedouin	0.00924	0.00074	0	6e-06	0	0.01039	0.000287	0.00101	0	0.002469
Bedouin	0.005397	0.004332	0.004829	0.027473	0.016761	0.011279	0.002234	0.004033	0.023124	0.017773
Bedouin	0.001305	0.000902	0.002095	0.02687	0.01235	0.013787	0.00412	0.000522	0.021884	0.017542
Bedouin	0.000809	0.011236	0.021909	0.009506	0.010054	0.00044	0.007275	0.00672	0.020108	0.015085
Bedouin	0.003943	0.011528	0.019412	0.012304	0.013805	0.007566	0.003318	0.007429	0.02206	0.015691
Bedouin	0.002691	0.008641	0.018416	0.007744	0.010435	0.005838	0.005878	0.005251	0.022435	0.017017
Bedouin	0	0.005569	0.017107	0.006661	0.009186	0	0.004199	0.004595	0.018183	0.016267
Bedouin	0	0.00801	0.018594	0.001189	0.014776	0	0.018079	0.017233	0.019703	0.011092
Palestinian	0.001191	0.011324	0.020847	0.005947	0.010134	0.000378	0.003926	0.006782	0.023526	0.016236
Palestinian	0.00053	0.011426	0.021125	0	0.017334	0.000333	0.005013	0.008228	0.025191	0.015066
Palestinian	0.000585	0.008377	0.019861	0.005633	0.001342	0.001007	0.006473	0.007014	0.022315	0.018119
Palestinian	0.000633	0.010335	0.01876	0.012273	0.012495	0.000322	0.00337	0.006013	0.021302	0.018101
Palestinian	0	0.00758	0.018529	0.000261	0.019106	0	0.018936	0.018889	0.020669	0.004712
Palestinian	0.000134	0.00985	0.018084	0.000167	0.015549	0.00086	0.014001	0.014291	0.018385	0.00782
Palestinian	0.001919	0.007181	0.016548	0.006904	0.007302	0.00566	0.003704	0.006217	0.018984	0.016453
Palestinian	0.001179	0.009767	0.016978	0.012117	0.006548	0.005591	0.005641	0.006223	0.021507	0.016571
Palestinian	0.004163	0.01114	0.017851	0.011375	0.011481	0.009955	0.007304	0.008666	0.001902	0.013954
Palestinian	0.000931	0.009752	0.01582	0.000892	0.012738	0	0.009968	0.010396	0.014351	0.005776
Palestinian	0.000496	0.008632	0.015209	0.002457	0.013086	9.3e-05	0.010658	0.011522	0.01466	0.012299
Palestinian	0	0.012678	0.019592	0	0.015648	0	0.011906	0.012628	0.020085	0.003107
Palestinian	0	0.010709	0.017245	0.001829	0.01806	0	0.011499	0.011861	0.01967	0.009362
Palestinian	0	0.036305	0.032856	0	0	0	0.001909	0.003885	0.008245	0
Palestinian	0	0	0	0	0	0	0	0	0	0
Palestinian	0	0.011606	0.015168	3.8e-05	0.012116	0	0.011446	0.012539	0.002268	6.3e-05
Palestinian	0	0.010929	0.01686	0.007022	0.01262	0	0.013493	0.012528	0.002762	0.004333
Palestinian	0	0	0	0	0	0	0.002718	0.002718	0	0
Palestinian	0	0.001534	0.001163	0	0	0	0.014206	0.014062	0.000182	0.000237
Palestinian	0	0	0	0	0	0	0	0	0	0
Palestinian	0	0.00469	0.001725	0	0	0	0.01332	0.014006	0.003535	0
Palestinian	0.001655	0.01182	0.020912	0.006896	0.015857	0.000716	0.011968	0.011564	0.020997	0.017712
Palestinian	0.003962	0.009902	0.016925	0.003957	0.01106	0.006627	0.008092	0.007985	0.018781	0.016297
Palestinian	0.000156	0.008942	0.016852	0.010101	0.013982	0	0.004768	0.007146	0.02146	0.017738
Palestinian	0.002941	0.011792	0.018211	0.002966	0.004037	0.008593	0.006793	0.008816	0.017951	0.014489
Jordanian	0	0.008001	0.016662	0	0.014695	0	0.01809	0.015628	0.01631	0.000739
Jordanian	0	0.008995	0.017024	0.000563	0.014913	0	0.016232	0.017498	0.015764	0.006724
Jordanian	0.003088	0.002313	0.015201	0.009077	0.00395	0.005647	0.006197	0.000833	0.019734	0.016791
Jordanian	0.003832	0.00995	0.017718	0.005632	0	0.007742	0.005324	0.004285	0.016804	0.014155
Jordanian	0.003386	0.01182	0.0193	0.011354	0.012926	0.008207	0.010663	0.01086	0.001882	0.011748
Jordanian	0	0.011149	0.016323	0.000862	0.015392	0	0.001161	0.006479	0.01803	0.008508
Jordanian	0	0.010244	0.017917	0.000375	0.016289	0	0.011165	0.010169	0.018689	0.003472
Jordanian	0.002985	0.011025	0.018324	0.00757	0.013817	0.000127	0.012461	0.011664	0.008422	0.012649
Jordanian	0.000207	0.009874	0.015379	0.002543	0.016565	0	0.012059	0.012365	0.019171	0.008084
Jordanian	0	0	0	0	0	0	0	0	0	0
Jordanian	0	0	0	0	0	0	0	0	0	0
Jordanian	0.000746	0.010105	0.017144	0.004001	0.013771	0	0.010513	0.011351	0.011008	0.005937
Jordanian	0.000245	0.010693	0.015629	0.001383	0.012429	0	0.012596	0.012636	0.008835	0.001174
Jordanian	0	0	0	0	0	0	0	0	0	0
Jordanian	0	0	0	0	0	1e-06	0.012989	0.01299	0	0
Jordanian	0	0	0	0	0	0	0	0	0	0
Jordanian	0	0.000755	0.000465	0	0	0	0.014836	0.014922	0	0.000211
Jordanian	0.002894	0.0072	0.017014	0.013743	0.004119	0.006328	0.005631	0.003513	0.019953	0.016632
Jordanian	2.6e-05	0.008247	0.018767	0.00764	0.007151	0	0.003527	0.006656	0.019043	0.018035
Jordanian	8e-06	0.008023	0.018128	0.006542	0.016184	0	0.012841	0.01326	0.022571	0.017128
Syrian	0.000427	0.012302	0.017822	0.010574	0.003514	0.001247	0.002689	0.007082	0.019809	0.017887
Syrian	0.000168	0.010775	0.01713	5.5e-05	0.014127	0	0.017627	0.017363	0.019442	0.009664
Syrian	0	0.008628	0.018424	0.001497	0.01374	0	0.017287	0.016669	0.015162	0.004753
Syrian	0.004585	0.010809	0.019	0.012714	0.000897	0.008717	0.005726	0.005621	0.020144	0.019413
Syrian	0.004506	0.009966	0.018163	0.010359	0.014811	0.008901	0.001586	0.007781	0.015308	0.015756
Syrian	0.000608	0.010792	0.017358	0.013189	0.008703	0.000626	0.004268	0.008085	0.001422	0.010395
Syrian	0	0.012735	0.019061	0.000514	0.013951	0	0.008674	0.00904	0.001638	0.012812
Syrian	0.000216	0.0094	0.018131	0.00217	0.016355	0.000512	0.012026	0.011716	0.021143	0.014539
Syrian	0	0.010985	0.017394	0.004744	0.012414	0	0.010805	0.012865	0.009211	0.008159
Syrian	0.000716	0.007809	0.017359	0.011676	0.011431	0.000768	0.005589	0.00646	0.020011	0.016108
Syrian	0	0.026708	0.024274	0	0.004519	0	0.002845	0.003635	0.005002	0.001665
Syrian	0	0	0	0	0	0	0	0	0	0
Syrian	0	0.009849	0.016182	0.000208	0.012669	0	0.011343	0.0126	0.008754	0.004215
Syrian	3.6e-05	0.011071	0.016097	0	0.013421	0	0.012014	0.011622	0.010524	0.004537
Syrian	0	0	0	0	0	0	0.012614	0.012614	0	0
Syrian	0	0	0	0	0	0	0.001141	0.001141	0	0
Lebanese Muslim	0	0	0	0	0	0	0.005576	0.005576	0	0
Lebanese Muslim	0	0.002886	0.000905	0.000375	0.000847	0	0.014234	0.014204	0.003064	0.0049
Lebanese Muslim	0.004058	0.010474	0.018193	0.011216	0.007081	0.007981	0.00071	0.005983	0.01895	0.015488
Lebanese Muslim	0.000641	0.011377	0.016374	0.004094	0.011474	3.6e-05	0.010886	0.011847	0	0.003684
Lebanese Muslim	0.002565	0.011041	0.017158	0.010994	0.016463	0.001647	0.002349	0.006149	0.022388	0.016262
Lebanese Muslim	1.5e-05	0.008869	0.017397	0.001028	0.014723	0	0.017573	0.020496	0.016379	0.003064
Lebanese Muslim	0	0.010392	0.017397	0.000804	0.016394	0	0.018127	0.01625	0.017134	0.004579
Lebanese Muslim	0.000429	0.010008	0.017525	0.007207	0.011172	0.000554	0.004586	0.006402	0.01817	0.015416
Lebanese Muslim	0.006552	0.007677	0.018874	0.009144	0.007035	0.013266	0.008101	0.008789	0.018953	0.017171
Lebanese Muslim	0.000886	0.011058	0.016613	0.001982	0.013111	0	0.00913	0.010467	0.003432	0.012185
Lebanese Muslim	0.000499	0.011308	0.015843	0.0078	0.01324	0	0.010294	0.010881	0	0.008668
Lebanese Muslim	0	0.009833	0.016146	0.003258	0.014835	0	0.01056	0.011126	0.02038	0.012018
Lebanese Muslim	0	0.009666	0.015481	0	0.016924	0	0.01143	0.012164	0.021096	0.013353
Lebanese Muslim	0	0	0	0	0	0	0	0	0	0
Lebanese Muslim	0	0.025113	0.023188	0	0.004202	0	0.005172	0.005639	0.008233	0.003285
Lebanese Muslim	0	0	0	0	0	0	0	0	0	0
Lebanese Muslim	2.3e-05	0.010651	0.015744	0.000646	0.011459	0	0.013831	0.012924	0.000929	0.000188
Lebanese Muslim	0	0.010258	0.017251	0.000236	0.013797	0	0.012938	0.013011	0.006252	0.00572
Lebanese Muslim	0	0	0	0	0	0	0.015013	0.015013	0	0
Lebanese Muslim	0	0	0	0	0	0	0	0	0	0
Lebanese Muslim	0	0	0	0	0	0	0.003696	0.003696	0	0
Lebanese Muslim	0	0.002152	0.00567	0	0	0	0.014328	0.014247	0.000492	0.000404
Lebanese Muslim	0.005134	0.000139	0	0	0	0.005145	0	0	0	0
Lebanese Muslim	0	0	0	0	0	0	0	0	0	0
Lebanese Muslim	0	0.002006	0.000761	0	0	0	0.01496	0.014966	0	0
Lebanese Christian	0	0	0	0	0	0	0	0	0	0
Lebanese Christian	0	0	0	0	6.5e-05	0	0.01564	0.015611	0.000275	0
Lebanese Christian	0	0.005016	0.004653	0.000244	0.006097	0	0.018083	0.016911	0.00664	0.000754
Lebanese Christian	0	0	0	0	0	0	0.017775	0.017775	1e-06	0
Lebanese Christian	0	0.003782	0.004864	0	0.001089	0	0.019624	0.018728	0.003068	0
Lebanese Christian	0	0.009948	0.017918	0.000305	0.013631	0	0.016905	0.018074	0.018089	0.010877
Lebanese Christian	0	0	0	0	0	0	0.008504	0.008504	0	0
Lebanese Christian	0	0	0	0	0	0	0.012084	0.012084	0	0
Lebanese Christian	0	0.006054	0.006024	0	0.000137	0	0.018597	0.01739	0.006619	0.006413
Lebanese Christian	0	0.00731	0.011446	0	0.00886	0	0.01821	0.01699	0.003619	0.000709
Lebanese Christian	0	0.00315	0.006129	0	0.001904	0	0.01658	0.016377	0	0.000876
Lebanese Christian	0.000338	0.003373	0.008655	0	0.00188	0	0.018813	0.017101	0.008382	0.002962
Lebanese Christian	0	0.009106	0.015541	0	0.015926	0	0.013926	0.017593	0.016056	0.009559
Lebanese Christian	0	0.00917	0.016651	0.001066	0.014331	0	0.01723	0.016832	0.017275	0.008743
Lebanese Christian	0	0	0	0	0	0	0.012272	0.012272	0	0
Lebanese Christian	0	0	0	0	0	0	0.012933	0.012933	0	0
Lebanese Christian	0	0	0	0	0	0	0.000658	0.000658	0	0
Lebanese Christian	0	0.000185	0.005043	0.000521	0.006079	0	0.019153	0.016826	0.005718	0.001173
Lebanese Christian	0	0.002597	0.009099	0	0.002377	0	0.018713	0.018326	0.00183	0
Lebanese Christian	0	0.000244	0	0	0	0	0.017962	0.017962	0	0
Lebanese Christian	0	0.005593	0.009487	0.000722	0.008516	0	0.015874	0.015375	0.009986	0
Lebanese Christian	0	0.009701	0.016319	0.003816	0.014398	0	0.014892	0.018115	0.016188	0.00883
Lebanese Christian	0.000489	0.0006	0.015206	0.010345	0.004655	0	0.000684	0.006323	0.019713	0.016515
Lebanese Christian	0.002406	0.009679	0.021045	0.009582	0.009758	0.006544	0.007023	0.008802	0.022032	0.017199
Lebanese Christian	0	0.002022	0.018609	0.003977	0.01219	0	0.005207	0.007091	0.023823	0.017698
Lebanese Druze	0	0.001915	0.017381	0.002857	0.009241	0	0.005911	0.006711	0.024519	0.019292
Lebanese Druze	0.003314	0.012225	0.021309	0.013074	0.01232	0.007807	0.008473	0.010089	0.021499	0.016505
Lebanese Druze	0	0.008259	0.015866	0.001786	0.0155	0	0.016727	0.015609	0.020631	0.012094
Lebanese Druze	0	0.009938	0.016777	0.000169	0.015939	0	0.015387	0.016687	0.01708	0.007574
Lebanese Druze	0.002861	0.010033	0.020501	0.010025	0.006108	0.006634	0.005489	0.002759	0.020145	0.01586
Lebanese Druze	0.004627	0.010318	0.016385	0.00643	0.003269	0.009374	0.003002	0.00624	0.017784	0.016556
Lebanese Druze	0.005633	0.009705	0.017243	0.00651	0.013975	0.012634	0.008362	0.009511	0.01793	0.012349
Lebanese Druze	0	0.010273	0.015408	0.003244	0.013775	0	0.010097	0.01046	0.019278	0.012723
Lebanese Druze	0	0.009621	0.018631	0.002197	0.015252	0	0.014597	0.014437	0.017388	0.009518
Lebanese Druze	0.000311	0.01101	0.018346	0.008125	0.016603	0	0.011449	0.011183	0.021207	0.006531
Lebanese Druze	0	0.016577	0.016151	0	0	0	7.3e-05	8.5e-05	0.003171	0
Lebanese Druze	0	0.022421	0.018973	0	0.013092	0	0.005368	0.006743	0.005075	0.002849
Lebanese Druze	0	0.000436	0	0	0	0	0	0	0.000436	0
Lebanese Druze	0.000158	0.010984	0.017749	0.007298	0.012555	0	0.012826	0.013995	0.003942	0.00174
Lebanese Druze	0	0.012266	0.016299	0.000368	0.011455	0	0.013238	0.01212	0.003299	0.000248
Lebanese Druze	0	0	0	0	0	0	0.012826	0.012826	0	0
Lebanese Druze	0	0	0	0	0	0	0	0	0	0
Lebanese Druze	0	0	0	0	0	0	0.011155	0.011155	0	0
Lebanese Druze	0	0.006335	0.008232	0	0.001884	0	0.014104	0.01425	0.006486	0.001342
Lebanese Druze	0	0.008655	0.016609	0.000817	0.01342	0	0.016418	0.014093	0.015792	0.008347
Lebanese Druze	0	0.009484	0.016983	0.001846	0.014547	0	0.012555	0.013816	0.018341	0.012286
Lebanese Druze	0.003575	0.010383	0.018428	0.011173	0.014518	0.008215	0.010599	0.011145	0.018402	0.015198
Lebanese Druze	6.3e-05	0.003695	0.01673	0.003771	0.007196	0.00109	0.006073	0.004004	0.02114	0.01732
Lebanese Druze	3.3e-05	0.010361	0.019454	0.005093	0.014323	0	0.004758	0.008127	0.017311	0.012247
Lebanese Druze	0	0.010811	0.015478	0.001731	0.016054	0	0.006651	0.00952	0.020625	0.012333
Carmel Druze	0.001354	0.010283	0.017878	0.003456	0.014084	0.00023	0.012681	0.012066	0.017323	0.011084
Carmel Druze	3.2e-05	0.009823	0.017274	0.001537	0.015395	0	0.01022	0.011068	0.018066	0.012519
Carmel Druze	0	0.030745	0.029207	0	0.004646	0	0.002685	0	0.002358	0.000597
Carmel Druze	0	0.001579	0.001579	0	0	0	0	0	0	0
Carmel Druze	0	0.011016	0.01809	0.002609	0.011942	0	0.011807	0.012724	0.003228	0.000195
Carmel Druze	0.000592	0.010843	0.014137	0.002208	0.012413	0.001652	0.013054	0.01334	0.001066	0.000296
Carmel Druze	0	0	0	0	0.000512	0	0.015381	0.015408	0	0
Carmel Druze	0	0	0	0	0	0	0	0	0	0
Carmel Druze	0	0.005903	0.006422	0	0.001131	0	0.01488	0.013271	0.005198	0
Carmel Druze	0	0	0	0	0	0	0.009102	0.009102	0	0
Carmel Druze	0	0	0	0	0	0	0.01295	0.01295	0	0
Carmel Druze	0	0	0	0	0	0	0	0	0	0
Carmel Druze	0	0	0	0	0	0	0.018784	0.018784	0	0
Carmel Druze	0	0	0	0	0	0	0.016441	0.016427	0.000184	5.6e-05
Carmel Druze	0	0.003467	0.002747	0	0.00022	0	0.017906	0.017364	0.001725	5.7e-05
Carmel Druze	0	0.009525	0.018217	0.000444	0.01346	0	0.016417	0.015269	0.017829	0.008473
Carmel Druze	0	0.00932	0.017595	0.004637	0.013729	0	0.016201	0.015092	0.016528	0.00443
Carmel Druze	0.007094	0.009109	0.020769	0.009762	0.011451	0.017686	0.009073	0.009719	0.016935	0.015538
Carmel Druze	0.000719	0.009707	0.01712	0.00599	0.001451	0.006124	0	0.005223	0.017012	0.016052
Carmel Druze	0.000619	0.010955	0.016938	0.012881	0.01033	0.006473	0.007537	0.009514	0.021102	0.015227
Carmel Druze	6.1e-05	0.011218	0.016678	0.009602	0.012108	0.000573	0.004122	0.00719	0.007021	0.012256
Carmel Druze	0.001975	0.011434	0.020038	0.010879	0.015693	3e-06	0.012542	0.012964	0.011387	0.007565
Carmel Druze	0	0.010211	0.016634	0.004835	0.015543	0	0.010302	0.010776	0.015862	0.008858
Carmel Druze	0.000228	0.011635	0.018021	0.00684	0.014774	0	0.012096	0.01207	0.011046	0.009664
Carmel Druze	0	0	0	0	0	0	0	0	0	0
Cypriot	0	0.023882	0.02164	0	0.012224	0	0.001651	0.005701	0.008049	0.003882
Cypriot	0.000387	0.01009	0.017548	0.000714	0.013093	0	0.011303	0.012268	0.009399	0.002596
Cypriot	0	0	0	0	0	0	0.014024	0.014024	0	0
Cypriot	0	0	0	0	0	0	0	0	0	0
Cypriot	0	0	0	0	0	0	0.005405	0.005405	0	0
Cypriot	1e-06	0.003834	0.005367	0	0	0	0.013443	0.01319	0	0
Cypriot	0	0	0	0	0	0	0	0	0	0
Cypriot	0	0	0	0	0	0	0.019555	0.019555	0	0
Cypriot	0	3.2e-05	0	0	0	0	0.016054	0.016049	0.000112	0
Cypriot	0	0.000175	0	0	0	0	0.01901	0.018994	0	0
Cypriot	0	0.00033	0.001727	0	0	0	0.018503	0.018296	0.000855	0.001105
Cypriot	0	0.009084	0.016445	0	0.015634	0	0.017397	0.016791	0.017823	0.010649
Sephardic Jew	0.00026	0.009331	0.016818	0.002062	0.014966	0	0.016826	0.015904	0.01693	0.003451
Sephardic Jew	0.004373	0.008333	0.017417	0.011322	0.013315	0.006544	0.00236	0.00615	0.020087	0.016514
Sephardic Jew	0.00297	0.0103	0.018671	0.014973	0.001678	0.007693	0.004784	0.006875	0.022027	0.018885
Sephardic Jew	0.002191	0.009236	0.015557	0.005796	0.015011	0.000457	0.00876	0.009852	0.017544	0.003932
Sephardic Jew	0.000207	0.010991	0.016831	0.004613	0.013124	5.1e-05	0.009946	0.010777	0.006389	0.010822
Sephardic Jew	0	0.009928	0.016972	0.002792	0.014746	0	0.008925	0.010106	0.01597	0.004361
Sephardic Jew	0	0.011976	0.020201	0.001367	0.017983	0	0.013094	0.012577	0.020495	0.003233
Sephardic Jew	0	0.005858	0.017155	0.008346	0.009755	0	0.004595	0.007399	0.019886	0.015281
Sephardic Jew	0	0	0	0	0	0	0	0	0	0
Sephardic Jew	0	0	0	0	0	0	0	0	0	0
Sephardic Jew	0	0.009914	0.018748	0.001993	0.014738	0	0.012062	0.014134	0.016455	0.001332
Sephardic Jew	0.000361	0.011606	0.016564	0.002544	0.011903	0	0.012515	0.013475	0.002501	0.00241
Sephardic Jew	1e-06	0	0	0	0	0	0.01373	0.01373	0	0
Sephardic Jew	0	0.001287	0.001362	0	0	0	0.012869	0.012644	0	0.001192
Sephardic Jew	0	0	0	0	0	0	0.003907	0.003907	0	0
Sephardic Jew	0	0	0	0	0	0	0.01927	0.01927	0	0
Sephardic Jew	0	0.003701	0.008721	0.000445	0.007411	0	0.018631	0.017395	0.007079	0.004509
Sephardic Jew	0	3.2e-05	8.3e-05	0	0	0	0.016872	0.016878	0	0
Sephardic Jew	0	0.003082	0.010813	0.003362	0.011435	0	0.017719	0.019108	0.00992	0.003223
Ashkenazy Jew	0	0.008894	0.017614	0.00076	0.014709	0	0.013422	0.014918	0.016838	7.7e-05
Ashkenazy Jew	0	0.010315	0.016828	5.7e-05	0.014847	0	0.017151	0.01557	0.017051	0.001789
Ashkenazy Jew	0.004178	0.008663	0.016933	0.011515	0.000577	0.008289	0.008374	0.008216	0.016972	0.015534
Ashkenazy Jew	0.004112	0.002603	0.017339	0.01674	0.000119	0.008577	0.005887	0.008029	0.025048	0.020459
Ashkenazy Jew	0	0.01121	0.018631	0	0.016714	0	0.001609	0.007428	0.020961	0.012648
Ashkenazy Jew	0.000435	0.009833	0.014704	0.010041	0.012296	6.5e-05	0.009964	0.009586	0.004906	0.010275
Ashkenazy Jew	0	0.011138	0.016262	0.000551	0.013759	0	0.010602	0.010713	0.019383	0.009606
Ashkenazy Jew	0	0.011987	0.016896	0.000328	0.015859	0	0.01069	0.009718	0.018379	0.00615
Ashkenazy Jew	0	0.024246	0.023541	0	0	0	0	0.001832	0.000366	0
Ashkenazy Jew	0	0.037323	0.035775	0	0.002557	0	8.9e-05	0.001463	0.00743	0.003202
Ashkenazy Jew	0	0.006567	0.006529	0	0	0	8.8e-05	0	0	0
Ashkenazy Jew	0	0.011426	0.014885	0	0.010691	0	0.011497	0.013459	0.003139	0.001715
Ashkenazy Jew	0	0.009903	0.014683	0.003732	0.012462	0	0.011457	0.011099	0.007062	0.002665
Ashkenazy Jew	0	0	0	0	0	0	0.014313	0.014313	0	0
Ashkenazy Jew	0	0	0	0	0	0	0.002426	0.002426	0	0
Ashkenazy Jew	0	0	0	0	0	0	0.017584	0.017584	0	0
Ashkenazy Jew	0	0.000821	0.000411	0	0.001461	0	0.016818	0.016819	0.000773	0.000354
Ashkenazy Jew	0	0.00159	0.009112	0.000374	0.009467	0	0.016406	0.015695	0.004358	0
Ashkenazy Jew	0	0	0	0	0	0	0.019903	0.019903	0	0
Ashkenazy Jew	0	0.000157	0.005476	0	0	0	0	0.005485	0	0
Ashkenazy Jew	0.005517	0.010013	0.018513	0.008356	0.011933	0.011628	0.008611	0.009939	0.021359	0.01599
Armenian	0.000377	0.010044	0.017956	0.002546	0.013906	0	0.017905	0.017645	0.017634	0.004546
Armenian	0.004931	0.008045	0.018371	0.006145	0.007865	0.00975	0.006344	0.004513	0.019795	0.016442
Armenian	0.002711	0.002727	0.017237	0.007582	0.000189	0.006927	0.004193	0.002825	0.01995	0.020583
Armenian	0.007138	0.008928	0.019828	0.008403	0.006218	0.016603	0.006922	0.007788	0.013508	0.013596
Armenian	3.7e-05	0.001883	0.017652	0.007768	0.014188	0	0.00258	0.007167	0.023216	0.015636
Armenian	0	0.010673	0.015002	0.001422	0.016007	0	0.010568	0.010854	0.016629	0.005407
Armenian	0	0.01793	0.020922	0.000262	0.013195	0	0.009982	0.010036	0.006938	0.007698
Armenian	0	0.033787	0.033075	0	0	0	0.002032	0.00126	0.002898	0
Armenian	0.00013	0.01172	0.015689	0.003846	0.014219	0	0.011727	0.012423	0.007752	0.005137
Armenian	0	0.010952	0.014953	0.000867	0.012348	0	0.012178	0.012245	0.005009	0.000614
Armenian	0	0	0	0	0	0	0.006761	0.006761	0	0
Armenian	0.001936	0.008879	0.016195	0.010922	0.002972	0.001245	0.007749	0.007867	0.018657	0.015849
Armenian	0	3.9e-05	0.000929	0	0	0	0.013221	0.013277	0	0
Armenian	0	0	0	0	0	0	0	0	0	0
Armenian	0	0	0	0	0	0	0.016838	0.016838	0	0
Armenian	0	0.000938	0	0	0	0	0.017169	0.017676	0.004315	0.002335
Armenian	0	0.007633	0.012643	0	0.009847	0	0.019063	0.01675	0.003807	0.000989
Armenian	0	0	0	0	0	0	0.01864	0.01864	0	0
Armenian	0	0.009207	0.017937	0.000794	0.014232	0	0.014704	0.015791	0.016473	0.010699
Georgian	0	0.000716	0.000991	0	0	0	0	0.001247	0	0
Georgian	0.000347	0.010106	0.017688	0.004634	0.018096	0	0.018356	0.017949	0.019123	0.005459
Georgian	0.002023	0.010021	0.018028	0.012611	0.014573	0.007429	0.00621	0.007788	0.021682	0.01739
Georgian	0.001319	0.006705	0.016004	0.007482	0.009939	0.005133	0.005305	0.004811	0.023189	0.01821
Georgian	0.00448	0.009934	0.017744	0.012732	0.010245	0.011422	0.009597	0.010138	0.014985	0.006711
Georgian	0.000687	0.009849	0.014598	0.006774	0.015717	0.000101	0.010663	0.010836	0.01449	0.006473
Georgian	0	0.011204	0.018961	0.000856	0.016236	0	0.011737	0.012468	0.017633	0.006517
Georgian	0	0.036584	0.036027	0	0.001734	0	3e-05	0.000613	0	0
Georgian	0.004246	0.010764	0.018925	0.006252	0.013259	0.008985	0.000716	0.005589	0.02072	0.016043
Georgian	0.002586	0.002119	0.016686	0.007004	0	0.007555	3.8e-05	0.001746	0.023657	0.020586
Georgian	0.000452	0.012401	0.018509	0.007542	0.01514	0	0.007316	0.009315	0.016748	0.011673
Georgian	0.00027	0.009868	0.016791	0.002773	0.014967	0	0.01141	0.010612	0.017781	0.005587
Georgian	0.001187	0.012582	0.022591	0.00908	0.017395	0	0.012723	0.013814	0.019525	0.000941
Georgian	0	0	0	0	0	0	0	0	0	0
Georgian	0	0.00824	0.012969	0	0.014317	0	0.016149	0.015904	0.012824	0.003225
Georgian	0	0.010294	0.017537	0	0.014866	0	0.015562	0.01785	0.017012	0.003666
Georgian	0	0.031744	0.030181	0	0.001549	0	0.004291	0.003264	0.000473	0
Georgian	0.000305	0.010469	0.016586	0.001403	0.011149	0	0.01106	0.01148	1.2e-05	0.003638
Georgian	0.000372	0.010303	0.017117	0.004844	0.013243	0.000106	0.011506	0.01218	0.011111	0.002472
Georgian	8.7e-05	0.010772	0.015502	0.002792	0.013892	0	0.012676	0.013737	0.010932	0.001131
Adygei	0	0.004592	0.004653	0.000595	0.000871	0	0.018487	0.018058	0.004786	0.000177
Adygei	0.00013	0.009002	0.016411	0.000443	0.015469	0	0.014611	0.018021	0.018076	0.010607
Adygei	7.4e-05	0.005904	0.010609	0.003925	0.003898	0	0.013754	0.013742	0.004983	0
Adygei	0	0.001382	0.001061	0.000156	0	0	0.012594	0.012122	0.001185	0.000422
Adygei	0	0.009642	0.011057	0	0.016317	0	0.023434	0.010685	0.005154	0.006281
Adygei	0	0	0	0	0	0	0.012921	0.012921	0	0
Adygei	0	0	0	0	0	0	0.012957	0.012957	0	0
Adygei	0	0	0	0	0	0	0.014197	0.014197	0	0
Adygei	0	0.006163	0.009133	0	0	0	0	0.007654	0	0
Adygei	0	0.00712	0.015834	0.001755	0.019595	0	0.003933	0.000439	0.021418	0.014339
Adygei	0	0.010374	0.013915	0.000225	0.015115	0	0.002086	0	0.017749	0
Adygei	0	0.006947	0.014511	0.010101	0.018472	0	0.000414	0.000518	0.021899	0.011363
Adygei	0	0.010099	0.01257	0.004755	0.019708	0	0	0.001569	0.022867	0.008196
Adygei	0.000469	0	0	0.010911	0.016783	0	0	0	0.019549	0.004791
Adygei	0	0	0	0.011854	0.017219	0	0	0	0.019535	0
Adygei	0	0.00042	0	0.009936	0.015978	0	0.000803	9e-05	0.017516	0.001358
Adygei	0	0.009132	0.015388	0.00617	0.019183	0	0	0.000508	0.023346	0.013689
Turk	0	0.01281	0.019002	0	0.015079	0	0.000278	0.00146	0.002992	0.010105
Turk	0	0.009947	0.015595	0	0.016731	0	0	0	0.020482	0.009828
Turk	0	0.001821	0.009956	0.004019	0.009476	0	0.015179	0.015214	0.006712	0.006159
Turk	0	0.005808	0.002858	0	0.011049	0	0.01575	0.001542	0.01185	0.000154
Turk	0	0	0	0	0	0	0.02047	0.02047	0	0
Turk	0	0	0	0	0	0	0.014853	0.014853	0	0
Turk	0	0	0	0	0	0	0.013038	0.013038	0	0
Turk	0.000428	0.001338	0.008837	0.001423	0	4.8e-05	0	0.00862	0	0
Turk	0	0.007545	0.01533	0.005071	0.015651	0	0.001293	0.001197	0.019098	0.009548
Turk	0	0.009155	0.014216	0.00492	0.01629	0	0.003826	1.7e-05	0.019156	0.004535
Turk	0	0.004053	0.014582	0.002491	0.017921	0	0	0.00037	0.022151	0.010707
Turk	0	0.008825	0.01496	0.002258	0.018012	0	0	0.000818	0.023024	0.013121
Turk	0	0	0	0.010906	0.019136	0	0.000324	5.4e-05	0.020352	0.00364
Turk	0	4.8e-05	0	0.011399	0.018396	0	0	0.000907	0.02178	0.008174
Turk	4.2e-05	0	0	0.009597	0.016616	0	0.000463	0.00095	0.018277	0.003793
Turk	0	0.004675	0.014324	0.006861	0.017806	0	0.0023	0.004194	0.023787	0.015461
Turk	0	0.006926	0.013373	0	0.018181	0	0.000922	0.000179	0.018783	0
Turk	0	0.009522	0.015422	0	0.018813	0	0.00091	3e-06	0.01995	0.005867
Turk	0	0.00576	0.010284	0.000339	0.004508	0	0.01594	0.016507	0.007611	0.002824
Iranian	0	0.010154	0.011329	0	0.016695	0	0.020655	0.00738	0.016451	0.00519
Iranian	0	0	0	0	0	0	0	0	0	0
Iranian	0	0	0	0	0	0	0.013175	0.013175	0	0
Iranian	0	0	0	0	0	0	0.01382	0.01382	0	0
Iranian	0	0	0	0	0	0	0.013841	0.013841	0	0
Iranian	0.000413	0.007072	0.011083	0.005452	0.000165	9.1e-05	0	0.007477	0	0.003984
Iranian	0	0.006162	0.016127	0.001112	0.02037	0	0	0	0.026496	0.008365
Iranian	0.000383	0.01023	0.014943	0.002429	0.016434	0	0.001585	0.001778	0.020118	0.012086
Iranian	0	0.009426	0.015684	0	0.016303	0	0.000135	0	0.018823	0.001527
Iranian	0	0.004957	0.011768	0.003592	0.017647	0	0.000369	0.000276	0.020336	0.0104
Iranian	0	0.004676	0.011602	0.00101	0.017489	0	0.001924	0.003149	0.021183	0.013654
Iranian	9e-06	0	0	0.010021	0.017219	0	0	0.000365	0.019062	0.003142
Iranian	0	0	0	0.009917	0.016782	0	0	0.000559	0.018938	0.005465
Iranian	0	0.007849	0.013604	0.006957	0.016604	0	0.002325	0.000486	0.019514	0.009635
Iranian	0	0.008715	0.015187	0.009417	0.017568	0	0.000807	0	0.024977	0.017362
Iranian	0	0.010486	0.016452	0	0.017741	0	0.000488	0	0.020469	0.009144
Iranian	0	0.00965	0.014789	0	0.016933	0	0.002619	0.00129	0.020116	0.000173
Iranian	6.2e-05	0.004721	0.012388	0.001261	0.008843	0	0.013944	0.015258	0.010696	0
Iranian	0	0.009568	0.012438	0	0.013734	0	0.020356	0.015676	0.007203	0.002906
Iranian	0	0.00113	0.003676	0	0	0	0.003896	0	0.000262	0
Italian	0	0	0	0	0	0	0.013399	0.013399	0	0
Italian	0	0	0	0	0	0	0.013561	0.013561	0	0
Italian	0	0	0	0	0	0	0.013779	0.013779	0	0
Italian	0.001442	0.004431	0.010692	0.001406	0	9.2e-05	0	0.008932	0	0.007891
Italian	0	0.008893	0.015019	0.001271	0.017455	0	0.002633	0.000906	0.022792	0.014347
Italian	1.1e-05	0.00919	0.014726	0.001962	0.01732	0	0.003008	0.003375	0.02065	0.011038
Italian	0	0.008505	0.016114	0.009027	0.018686	0	0.002462	0.003445	0.022212	0.016364
Italian	0.00011	0.011435	0.01577	0.001002	0.010729	0	0.012904	0.012404	0.004023	0.007253
Italian	0	0.009892	0.015625	0	0.013049	0	0.011753	0.012934	0.00421	0.006329
Italian	0	0.00501	0.009906	0.001682	0.008795	0	0.013907	0.014792	0.007396	0.003333
Italian	0	0.007642	0.002984	0	0.013205	0	0.016523	0.00145	0	0.001938
Italian	0	1e-06	6.1e-05	0	0	0	6.1e-05	0	0	0
Italian	0	0	0	0	0	0	0.01365	0.01365	0	0
Italian	0	0	0	0	0	0	0.012632	0.012632	0	0
Italian	0	0	0	0	0	0	0.012472	0.012472	0	0
Italian	0.001755	0.001784	0.007178	0.000574	0	0.001207	0	0.006861	0	0.002051
Italian	0.000406	0.010036	0.014276	0.00853	0.017483	0	0.001497	0.003634	0.01905	0.00513
Italian	5.6e-05	0.010279	0.017515	0.009673	0.016194	0.000632	0.005244	0.004521	0.019691	0.010321
Italian	0	0.008206	0.014574	0.00264	0.019107	0	0.003922	0.001101	0.019962	0.008563
Italian	0	0.000233	0	0	0	0	0.000233	0	0	0
Italian	0	0.000233	0	0	0	0	0.010408	0.010413	0	0
Sardinian	0	0.003971	0.011902	0	0.013803	0	0.016812	0.005992	0.001324	0.002062
Sardinian	0	0	0	0	0	0	0.015474	0.015474	0	0
Sardinian	0	0.003278	0.01059	0	0.001535	0	0.016104	0.016162	0.0085	0.003668
Sardinian	0	0	0.000356	0	0	0	0.000762	6.8e-05	0.000425	0
Sardinian	0	0	0	0	0	0	0	0	0	0
Sardinian	0	0	0	0	0	0	0.011634	0.011634	0	0
Sardinian	0	0	0	0	0	0	0.013129	0.013129	0	0
Sardinian	0	0	0	0	0	0	0.014038	0.014038	0	0
Sardinian	0.002612	0.005926	0.010727	0.001845	0.00066	0.000464	0	0.007311	0	0.006415
Sardinian	0.000299	0.00941	0.015338	0.000461	0.017569	0	0.004641	0.002997	0.020081	0.001309
Sardinian	0	0.00855	0.014141	0	0.016433	0	0.00099	0.001414	0.020162	0.007521
Sardinian	0	0.009146	0.014904	0.009885	0.017455	0	0.000865	0.001928	0.021251	0.013188
Sardinian	1e-06	0.006078	0.013301	0.000835	0.016079	0	0.001464	0.00261	0.020652	0.012775
Sardinian	0.000141	0	0	0.01131	0.014896	0	0	3e-05	0.016765	0.001074
Sardinian	0	0	0	0.009854	0.017255	0	0	0	0.018834	0.001641
Sardinian	0	0.009279	0.016133	0.006186	0.018056	0	0.002453	0.0044	0.023572	0.014477
Sardinian	1.2e-05	0.007536	0.013929	0.010007	0.016174	0	0.004318	0.004857	0.01801	0.01414
Sardinian	0	0.009406	0.015723	0	0.016975	0	0.000939	0	0.018809	0.005857
Sardinian	0	0.010113	0.015681	0	0.019066	0	0.010475	0.009466	0.019855	0
Sardinian	0	0.006065	0.016284	0.006552	0.001625	0.001539	0.006822	0.001784	0.018476	0.014225
Sardinian	0	0.006207	0.010506	0	0.008971	0	0.014065	0.016268	0.004473	0.001458
Sardinian	0	0.003599	0.001805	0	0.01047	0	0.015768	0.00693	0.002961	0.001181
Sardinian	0	0.007802	0.010628	0	0.004984	0	0.018502	0.005719	0.007165	0
Sardinian	0	0	0	0	0	0	0.014371	0.014371	0	0
Sardinian	0	0	0	0	0	0	0.014248	0.014248	0	0
French	0	0	0	0	0	0	0.013712	0.013712	0	0
French	0.001299	0.001834	0.008307	0.000963	0	0	0	0.008023	0	0
French	0.000113	0.009306	0.014618	0.003258	0.016989	0	0.00209	0.002473	0.020904	0.007525
French	0	0.009672	0.013453	0.006765	0.017258	0	0.001678	0.00028	0.019884	0.00048
French	0	0.009129	0.016206	0.007096	0.017114	0	0.002727	0.003067	0.02334	0.011707
French	0	0.009611	0.015726	0	0.018548	0	0.009613	0.008834	0.017517	0
French	0	0.009207	0.013238	0	0.011113	0	0.009027	0	0	0.001007
French	0	0.011324	0.01556	0	0.012538	0	0.008443	0.001255	0.000197	0
French	0.000376	0.004868	0.014123	0.010428	0.017248	5.7e-05	0.005092	0.001418	0.020594	0.014596
French	0	0.007115	0.016416	0.000802	0.022036	0	0	0	0.027492	0.009443
French	0.000103	0.005299	0.009537	0.000509	0.008234	0	0.014674	0.015211	0.007584	0.001107
French	0	0.000139	0	0	0	0	0.000139	0	0	0
French	0	0.001071	0.001948	0	0.002512	0	0.004019	0.001264	0	0
French	0	0	0	0	0	0	0.012287	0.012287	0	0
French	0	0.006802	0.012374	0.000463	0.019291	0	0.000378	0.000789	0.024227	0.014371
French	0	0.006892	0.010628	0	0.020021	0	1.1e-05	0	0.023219	0.012081
French	0	0	0	0.011628	0.017491	0	0	0.002818	0.01742	0.003444
French	0	0	0	0.010635	0.017188	0	0.000116	0.001486	0.020931	0.00763
French	0	0.008477	0.014337	0.004402	0.016626	0	0.000328	0.000678	0.023883	0.013891
French	7e-05	0.010422	0.014894	0.007881	0.014598	0.000142	0	0.000551	0.020504	0.014012
French	0	0.010708	0.01522	0	0.018826	0	0.001778	0	0.019453	0.000977
French	0	0.010169	0.017246	0	0.017288	0	0.010994	0.006369	0.018651	0
French	0	0.000533	0.003371	0	0	0	0.006813	0.006017	0	0
French	0	0.009128	0.004636	0	0.015634	0	0.0185	0.00541	0.00515	0.0008
French	0	0	0	0	0	0	0.012434	0.012434	0	0
Spaniard	0	0	0	0	0	0	0.013704	0.013704	0	0
Spaniard	0.001429	0.005037	0.010344	0	0	0.000569	0	0.008991	0	0.003845
Spaniard	9e-05	0.010317	0.015391	0.007267	0.016477	0	0.004635	0.000967	0.020505	0.009964
Spaniard	0	0.009267	0.016374	0.000926	0.016377	0	0.001398	0.00178	0.019648	0.009613
Spaniard	0	0.006897	0.013485	0.007048	0.017487	0	0.000113	0.000453	0.024811	0.016256
Spaniard	3.2e-05	0	0	0.011577	0.018809	1.9e-05	0	0.000142	0.020089	0.001973
Spaniard	7e-05	0	0	0.010556	0.01998	0	0	0	0.022452	0.000938
Spaniard	0	0	0	0.010606	0.016414	0	0	9.1e-05	0.019788	0.004001
Spaniard	0.002426	0.001798	0.009762	0.000103	0	0	0	0.008848	0	0.003231
Spaniard	0.00026	0.00849	0.015509	0.002623	0.017694	0	0.002095	0	0.017951	0.000522
Spaniard	0	0.008273	0.013065	0.005679	0.016267	0	0.002075	0.00142	0.02286	0.014921
Spaniard	0	0.00783	0.01257	0.001255	0.018146	0	0.001304	0.000476	0.022494	0.011668
Basque	0	0.004581	0.014413	0.007186	0.020379	0	0	0.002186	0.021609	0.012
Basque	0	0.008855	0.01231	0.006537	0.01811	0	6.5e-05	0	0.020383	0.0103
Basque	0.000347	0	0	0.011688	0.018563	0	0.000507	0.000259	0.024015	0.014557
Basque	5.6e-05	0	0	0.011256	0.017991	0	0	4.9e-05	0.019634	0.00621
Basque	0	0.008851	0.016572	0.004062	0.01886	0	0.001656	0.001446	0.022227	0.015454
Basque	0	0.009876	0.016079	0.009857	0.017296	0	0.003174	0.001776	0.021988	0.014539
Basque	0	0.009116	0.013788	0	0.01624	0	0.003899	0.000647	0.017274	0
Basque	0	0.010429	0.01593	0	0.016384	0	0.006721	0.00019	0.017952	0
Basque	0	0.003244	0.012722	0.009555	0.019861	0	0.003857	0.001656	0.022152	0.007223
Basque	0	0.008325	0.014031	0.003351	0.017259	0	0.003327	0.000645	0.021466	0.015885
Basque	0	0.009619	0.015159	0	0.016174	0	0.000627	0.000229	0.018671	0.001341
Basque	0	0.007719	0.015007	0.000624	0.017199	0	0.000929	0.001141	0.018113	0.003209
Basque	0	0.009426	0.014265	0.002273	0.015992	0	0	0.001063	0.019378	0.009015
Basque	0	0	0	0.011139	0.016098	0	0	0.000186	0.019565	0.003316
Basque	0	0	0	0.010032	0.015603	0	0	0	0.017623	0
Basque	0	0.010162	0.01777	0.01039	0.020841	0	0.002712	0.002039	0.025213	0.015931
Basque	0	0.006783	0.014365	0.005274	0.017322	0	0.000188	0.000433	0.023843	0.014506
Basque	0	0.01257	0.016549	0	0.016573	0	0	0.000352	0.010593	0.012204
Basque	0	0.00996	0.015975	0	0.015442	0	0.007766	0.003144	0.0175	0
Basque	0	0.00947	0.016719	0	0.017492	0	0.007084	0	0.020013	0
Basque	0	0.009729	0.013548	0	0.013425	0	0.008868	0	0.005682	0
Basque	0	0.00938	0.014689	0	0.01472	0	0.008144	0.00271	0.009736	0.002225
Basque	0	0.009489	0.01422	0	0.014918	0	0.008472	0.004236	0.011369	0.00072
Basque	0.007985	0.000141	0.00028	0.001498	0	0.009294	0.000684	0.000441	0	0.004594
Orcadian	0.007631	0	0.000269	0	0	0.008737	0.000788	0.000479	0	0.004322
Orcadian	0.010024	0.000341	0.000367	0	0	0.011338	0.001334	0.001087	0	0.003759
Orcadian	0.000933	0	0	0.011798	0	0.011814	0	0	0	0
Orcadian	0	0.000912	0.000156	0.00383	0	0	0	0	0.001411	0.002596
Orcadian	0	0.01006	0.012163	0.005831	0.019064	0	0.001019	0.0013	0.02298	0.012394
Orcadian	0	0.005731	0.012896	0.01055	0.019622	0	0.000968	0.001178	0.020611	0.007386
Orcadian	0.000958	0	0	0.012272	0.01658	0.000242	0	0.000155	0.018969	0.004241
Orcadian	0	0	0	0.009705	0.016523	0	0	0.001095	0.018473	0.002126
Orcadian	0.000185	0.00895	0.014356	0.00921	0.016669	0	0.001268	0.002087	0.020777	0.014645
Orcadian	0	0.008581	0.014843	0.007181	0.015507	0	0.004221	0.004112	0.0202	0.014106
Orcadian	0	0.009809	0.01367	0.000182	0.01764	0	0.001522	9.1e-05	0.018894	0.002821
Orcadian	0	0.009801	0.017575	0	0.020929	0	0.013026	0.012138	0.021287	0.000132
Orcadian	0	0.00943	0.013497	0	0.014247	0	0.00787	0.000431	0.003366	0
Orcadian	0	0.011018	0.014203	0	0.012185	0	0.007883	0.000655	0.0013	0.00124
Orcadian	0	0.00764	0.01363	0.001344	0.018021	0	0.001946	0.004549	0.021339	0.00987
Orcadian	0	0	0.000131	0.012305	0.018566	0	0	0.002167	0.022791	0.011836
Hungarian	0	0	0	0.012209	0.017097	0	0	1e-06	0.018785	0
Hungarian	0.000301	0	0	0.010547	0.015845	0	0	0	0.017659	0.003938
Hungarian	0	0.010799	0.01414	0.00582	0.017869	0	0.004534	0.003369	0.021002	0.011666
Hungarian	0	0.009551	0.014096	0.002033	0.01629	0.000525	0.000517	0.003478	0.02034	0.015028
Hungarian	0	0.009659	0.014324	0	0.019575	0	0.003834	0	0.021426	0.002504
Hungarian	0	0.009873	0.017791	0	0.017313	0	0.00695	0.003762	0.018595	0
Hungarian	0	0.009235	0.015641	0	0.017211	0	0.00855	0.00536	0.018395	0
Hungarian	0	0.010222	0.013754	0	0.01281	0	0.008314	0.000866	0	0
Hungarian	0	0.011034	0.015532	0	0.013424	0	0.008729	0.000563	0.001412	0
Hungarian	0.007037	0	0	0	0	0.009362	0.001132	0.002512	0	0.005582
Hungarian	0.015261	0	0	0	0	0.015236	0.000206	2.4e-05	0	0
Hungarian	0.007965	0.001642	0.000736	0.007827	0	0.009803	0.001972	0.000604	0.00018	0.007389
Hungarian	0.009953	0.000868	0.001172	0.00028	0	0.010516	0	0.001642	0.000387	0.000997
Hungarian	0	0.000644	0.003598	0	0	0	0.007423	0.004417	0	0
Hungarian	0	0.010695	0.009922	0.000778	0.015549	0	0.024508	0.01403	2.3e-05	0.000148
Hungarian	0	0	0	0	0	0	0.013781	0.013781	0	0
Hungarian	0	0.010584	0.01687	0	0.016621	0	0.011747	0.003922	0.019306	0
Hungarian	0	0.010106	0.014173	0	0.013124	0	0.009375	0.002447	0.002179	0.000831
Hungarian	0	0.009641	0.012448	0	0.01227	0	0.008624	0.000363	0	0
Hungarian	0	0.01045	0.014849	0	0.017698	0	0.006877	0.002171	0.019728	0
Russian	0	0.010825	0.012665	0	0.012356	0	0.007544	0	0.002747	0.001601
Russian	0	0.01001	0.01385	0	0.013827	0	0.008756	0.000653	0.005537	0.00111
Russian	0.00215	0.006938	0.01113	0.003016	0	0.000881	0	0.009126	0	0.002374
Russian	0.001188	0.00763	0.013759	0.005483	0.016196	0	0	0.001418	0.017563	0.006272
Russian	0	0.010501	0.016333	0	0.018976	0	0.008275	0.001455	0.019381	0
Russian	0	0.010548	0.015294	0	0.013427	0	0.010131	0	0.001466	0.001785
Russian	0	0.012677	0.015156	0	0.01371	0	0.009515	0.001188	0.003628	0.001741
Russian	0	0.011069	0.018353	0.000479	0.012869	0	0.013056	0.014548	0.010403	0.001865
Russian	0.000257	0.010578	0.019334	0.011698	0.008553	0	0.006278	0.008077	0	0.010278
Russian	0	0.006645	0.01382	0.003752	0.018648	0	2.5e-05	0.000485	0.020532	0.014522
Russian	5.5e-05	0.008966	0.012709	0.00592	0.017885	0	0.000787	0.002443	0.018369	0.003337
Russian	0	0	0	0.01079	0.015973	0	4.8e-05	0	0.020572	0.006065
Russian	0	0.004315	0.015131	0.00326	0.018186	0	0.000652	0.003574	0.022797	0.011713
Russian	0	0.010121	0.016846	0.000897	0.017716	0	0.001359	0	0.019684	0.000775
Russian	0	0.009225	0.016581	0	0.018085	0	0	0	0.020182	0.005932
Russian	0	0.010221	0.015739	0	0.015785	0	0.009431	0.009613	0.017737	0.000291
Russian	0	0.010894	0.015141	0	0.013371	0	0.008045	0.000103	0.001066	0.000504
Russian	0	0.008659	0.013741	0	0.012539	0	0.008559	0.00378	0.001249	0
Russian	0	0.009751	0.016273	0	0.018597	0	0.007709	0.002187	0.020108	0
Russian	0	0.010014	0.016569	0	0.015129	0	0.007756	0	0.011146	0.000995
Russian	0	0.009922	0.016263	0	0.016103	0	0.008931	0.003627	0.014998	0
Russian	0	0.009359	0.014509	0	0.014917	0	0.00626	0.001878	0.017525	0
Russian	0	0.009101	0.014616	0	0.013253	0	0.008286	0	0.000149	0
Russian	0	0.00971	0.014192	0	0.012828	0	0.009333	0.002878	0	0
Russian	0	0.010023	0.016879	0	0.017332	0	0.007176	0.000254	0.017746	0.000119
Burusho	0	0.009145	0.014528	0	0.015769	0	0.00682	0.000838	0.013158	0.001925
Burusho	0	0.009856	0.016357	0	0.014713	0	0.007935	0.000255	0.004993	0
Burusho	0	0.010454	0.014542	0	0.012308	0	0.008133	0.002048	0.0033	0
Burusho	0	0.0099	0.014875	0	0.016395	0	0.011456	0.007874	0.019476	0.002942
Burusho	0	0.010061	0.014241	0	0.013762	0	0.00706	0.000945	0.007692	0.003894
Burusho	0	0.00937	0.014731	0.010082	0.01646	0	0.001016	0.000493	0.019971	0.012209
Burusho	0.001089	0.007323	0.0102	0.001764	0.00285	0	0	0.007949	0.001395	0.000829
Burusho	0	0.000525	0.011842	0.009955	0.016722	0	0.000914	0.001095	0.021513	0.01796
Burusho	0	0	0.00131	0	0	0	0.002156	0.000913	0	0.001225
Burusho	0	0.008841	0.014578	0.004583	0.017	0	0	6.1e-05	0.019993	0.008451
Burusho	0	0.011082	0.015903	0.00119	0.017413	0	0.0006	0	0.018666	0.002963
Burusho	0	0.003831	0.012113	0.001916	0.019009	0	0	0.000611	0.023503	0.013877
Burusho	0	0.009021	0.013598	0.001219	0.013511	0	0.018334	0.012343	0.000417	0
Burusho	0	0.000187	0.011014	0.004625	0.017019	0	0	0	0.021362	0.010895
Burusho	0.001811	0.003361	0.013024	0.010606	0.018243	0.000418	0.006589	0.005798	0.02447	0.015257
Burusho	0.000278	0.008419	0.015549	0.006509	0.016425	0.000113	0.008731	0.00543	0.019526	0.01588
Burusho	0	0.009605	0.014481	0.01037	0.016713	0.000542	0.007117	0.006585	0.022469	0.016634
Burusho	0.000712	0.006489	0.012903	0.009349	0.017237	0.000435	0.001548	0.001677	0.020673	0.012663
Burusho	2.5e-05	0.008427	0.011677	0.010833	0.017051	0	0.002946	0.001264	0.021727	0.015412
Burusho	0.000381	0.008673	0.014486	0.011198	0.018207	6.9e-05	0.001962	0.001596	0.022447	0.015084
Burusho	0	0.007126	0.013808	0.008674	0.016724	0	0.004524	0.002603	0.022372	0.011477
Burusho	0.002504	0.008852	0.013918	0.01276	0.01963	0.001953	0.003145	0.000491	0.020197	0.004152
Burusho	0.0073	0.005158	0.012557	0.012991	0.008359	0.016227	0.005431	0.009191	0.018008	0.02119
Burusho	0.005984	0.007148	0.016837	0.012475	0.006488	0.014055	0.007033	0.007846	0.031123	0.034026
Burusho	0.008376	0.000368	0.005525	0	0	0.016763	0.002456	0.003328	0	0.01677
Pathan	0.004988	0.006793	0.014742	0.01432	0.008536	0.010725	0.00604	0.005245	0.023894	0.019098
Pathan	0.005036	0.007921	0.013747	0.013767	0.00816	0.011603	0.007471	0.007385	0.019388	0.019724
Pathan	0.008357	0.000347	0.005575	0	0	0.016755	0.002427	0.003356	0	0.016806
Pathan	0.006008	0.008442	0.01749	0.011897	0.011173	0.012766	0.007006	0.007614	0.032721	0.03319
Pathan	0.004969	0.010098	0.018837	0.013437	0.008635	0.01168	0.006515	0.007701	0.02003	0.021245
Pathan	0.003699	0.008843	0.016969	0.011935	0.012933	0.00926	0.005378	0.004101	0.021834	0.019922
Pathan	0.005069	0.001935	0.015313	0.014735	0.001828	0.008427	0.000187	0.001129	0.018704	0.019448
Pathan	0.002801	0.007733	0.014033	0.007738	0.00065	0.003929	0	0.001468	0.019841	0.026004
Pathan	0.006923	0.009508	0.014674	0.012358	0.005362	0.01603	0.00693	0.005878	0.01913	0.01906
Pathan	0.002045	0.005057	0.013737	0.013157	0.010667	0.007759	0.002539	0.000344	0.019792	0.021126
Pathan	0.000582	0.004052	0.013625	0.005122	0.000236	0.00055	0.003285	0.001927	0.018796	0.021849
Pathan	0.000424	0.004236	0.002308	0.001391	0.004376	0	0.000265	0	0.035305	0.035706
Pathan	0.002024	0.006933	0.013804	0.011078	0.010848	0.007425	0.004593	0.001132	0.018952	0.021761
Pathan	0.003717	0.009235	0.014432	0.012793	0.016044	0.005574	0.001933	0.003329	0.020174	0.017238
Pathan	0.005632	0.008488	0.013311	0.012409	0.001515	0.002523	0.002193	0.001448	0.022152	0.024388
Pathan	0.004512	0.009334	0.018215	0.007356	0.002396	0.007056	0	0	0.018124	0.019595
Pathan	0.003843	0.009382	0.014068	0.003032	0	0.003119	0.000283	0.002505	0.019257	0.021679
Pathan	0.004812	0.004486	0.013153	0.013956	0.004768	0.010125	0.001768	0.005193	0.021036	0.017882
Pathan	0.004942	0.001164	0.013974	0.013569	0.011091	0.01162	0.006287	0.005063	0.019413	0.016994
Pathan	0.005067	0.005511	0.015873	0.013792	0.013436	0.010919	0.001856	0.005463	0.022699	0.01973
Pathan	0.002761	0.008347	0.014062	0.015087	0.006271	0.009875	0.002798	0.003952	0.019676	0.020591
Pathan	0.00409	0.007388	0.014287	0.01574	0.005224	0.011347	0.00289	0.002663	0.019024	0.018233
Pathan	0.005087	0.005027	0.012508	0.014421	0.010677	0.009848	0.004024	0.006001	0.018544	0.017171
Sindhi	0.005385	0.003872	0.013658	0.013596	0.008599	0.009185	0.00242	0.005035	0.02136	0.02159
Sindhi	0.005467	0.004664	0.013021	0.014058	0.006111	0.012593	0.004701	0.006225	0.020066	0.01857
Sindhi	0.004385	0.002783	0.012506	0.015888	0.010656	0.009345	0.003214	0.000106	0.020164	0.018541
Sindhi	0.004403	0.00548	0.012608	0.015359	0.012969	0.010153	0.000799	0.002386	0.022748	0.017823
Sindhi	0.004775	0.006853	0.01458	0.015446	0.010469	0.010233	0.003128	0.00199	0.019559	0.01704
Sindhi	0.005129	0.007309	0.012993	0.014266	0.013498	0.009077	0.00418	0.002355	0.019955	0.018383
Sindhi	0.000114	0.009872	0.015728	0.012688	0.018028	0.000963	0.002434	0.003733	0.023053	0.014969
Sindhi	0.002538	0.008052	0.01409	0.01119	0.017867	0.001977	6e-06	0.000863	0.020059	0.014333
Sindhi	0.002744	0.00826	0.015176	0.013505	0.015646	0.002605	0.001383	0.002371	0.020113	0.017007
Sindhi	0.0023	0.009031	0.014604	0.012302	0.018198	0.002493	0.001069	0.002674	0.020773	0.013905
Sindhi	0.000419	0.005957	0.013482	0.011186	0.017666	0.003636	0.000609	0.002138	0.021595	0.016313
Sindhi	0.002593	0.00956	0.014656	0.013748	0.019376	0.004184	0.00169	0.003527	0.024049	0.01504
Sindhi	0.002338	0.008004	0.014952	0.010377	0.020654	0.000692	0.000474	0.000675	0.022724	0.012577
Sindhi	0.001587	0.003375	0.014632	0.009732	0.015468	0.000104	0.002538	0.001877	0.019647	0.01549
Sindhi	0	0.008204	0.013287	0.009909	0.014611	0.001396	0.001772	0.000591	0.021174	0.018336
Sindhi	0.001316	0.007549	0.015235	0.009577	0.014876	0.000319	0.002346	0.002349	0.020939	0.015338
Sindhi	0.00036	0.007872	0.015492	0.009679	0.014847	0	0.00353	0.001522	0.019803	0.016408
Sindhi	0.000264	0.009098	0.016342	0.010613	0.017983	0	0.004842	0.000344	0.021657	0.0175
Sindhi	0	0.008929	0.015296	0.009581	0.017565	0	0.000928	0.002506	0.023062	0.016818
Sindhi	0	0.008371	0.014937	0.006745	0.015662	0.000125	0.000844	0.001523	0.020979	0.015468
Sindhi	0.000298	0.009308	0.015157	0.011256	0.016955	0.001499	0.002987	0.001636	0.022736	0.018624
Sindhi	0.000306	0.009256	0.0133	0.008931	0.014963	3.5e-05	0.001639	0.00173	0.020898	0.015403
Sindhi	0.000619	0.010048	0.01462	0.012276	0.017065	0.0012	0.000969	0.00089	0.022755	0.019591
Sindhi	0.000378	0.00934	0.013959	0.010417	0.017328	0.000459	0.004564	0.005607	0.021464	0.016859
Sindhi	0.002135	0.006999	0.013337	0.011303	0.015437	0.00108	0.000599	0	0.021535	0.016993
Balochi	1.9e-05	0.009599	0.016752	0	0.020897	0	0.008005	0.002195	0.022834	0.001433
Balochi	0	0.009549	0.01396	0	0.017029	0	0.005825	0.000514	0.018161	0.003465
Balochi	0	0.009914	0.015229	0.002926	0.01681	0	0.006018	0.000318	0.019152	0.009827
Balochi	0	0.009064	0.015893	0	0.018469	0	0.006225	0.000808	0.02011	0.004706
Balochi	0	0.009127	0.014548	9.1e-05	0.016381	0	0.004548	0.00195	0.018848	0.001261
Balochi	0	0.008025	0.014109	0	0.015833	0	0.006019	0.001669	0.022284	0.012103
Balochi	0	0.009762	0.015428	0.000482	0.016117	0	0.007126	0.002845	0.019412	0.004711
Balochi	0	0.009278	0.016319	0.00175	0.019068	0	0.004263	0.001095	0.02213	0.0045
Balochi	0	0.009322	0.016158	0.000836	0.016866	0	0.006331	0.001327	0.019099	0.005001
Balochi	0	0.008134	0.015811	0.000323	0.019008	0	0.005863	0.003957	0.022114	0.011092
Balochi	0	0.009945	0.016035	0.000186	0.0188	0	0.00388	0.003674	0.022355	0.01143
Balochi	0	0.010623	0.016049	0.00058	0.017837	0	0.005785	0.000262	0.018962	0.004937
Balochi	0	0.010773	0.017977	0	0.016929	0	0.005736	0.000906	0.020838	0.013404
Balochi	0.000507	0.010723	0.018268	0.000382	0.021766	0.000315	0.007403	0.002267	0.024758	0.003788
Balochi	0	0.009343	0.015945	0	0.019431	0	0.006371	0.002697	0.021992	0.004344
Balochi	0	0.009051	0.014226	0	0.016237	0	0.005971	0.001232	0.017578	0.006331
Balochi	0	0.0082	0.015936	0.001301	0.018442	0	0.00705	0.005336	0.019071	0.005166
Balochi	0	0.009054	0.015879	0	0.018691	0	0.005407	0.003616	0.020674	0.006964
Balochi	0	0.009026	0.016474	0	0.016666	0	0.00619	5.3e-05	0.019413	0.007496
Balochi	0	0.008954	0.014862	0	0.018742	0	0.005448	0.000109	0.02107	0.011792
Balochi	0.000475	0.008728	0.015064	0.012115	0.014788	0.002486	0.00352	0.00244	0.020649	0.016326
Balochi	0.000492	0.008921	0.014511	0.012209	0.017	0.000215	0.001718	0.003011	0.022877	0.016766
Balochi	0.002041	0.006952	0.014375	0.01357	0.018561	0.002208	0.000374	0.001359	0.02197	0.016689
Balochi	0.001418	0.007267	0.014236	0.014298	0.017128	0.004838	0.002936	0.002978	0.022718	0.017373
Balochi	0.002402	0.005804	0.013019	0.013472	0.015214	0.003259	0.003229	0.002776	0.019855	0.015204
Brahui	0.000347	0.002112	0.013851	0.014589	0.018079	0.001492	0.005214	0.003688	0.024498	0.018657
Brahui	0	0.009708	0.016661	0.011722	0.016131	0.000251	0.001958	0.003042	0.021292	0.015357
Brahui	0.001468	0.001876	0.015113	0.011728	0.016321	0	0.004804	0.004601	0.021204	0.01605
Brahui	0.000975	0.008614	0.016656	0.012349	0.015158	0.00267	0.005668	0.003912	0.02024	0.017385
Brahui	5.9e-05	0.008971	0.016369	0.011958	0.015332	0.000837	0.003162	0.002473	0.021729	0.01623
Brahui	0.001995	0.007594	0.014784	0.015852	0.022466	0.003726	0.000432	0.002909	0.028549	0.020874
Brahui	0.0024	0.008855	0.014827	0.010772	0.017579	0.004055	0.004349	0.005053	0.019761	0.01606
Brahui	0.001055	0.009218	0.01421	0.013	0.017204	0.002123	0.003406	0.00284	0.01952	0.015266
Brahui	0.002593	0.009774	0.01588	0.011678	0.016175	0.001977	0.004597	0.001288	0.022825	0.017439
Brahui	0.001168	0.009257	0.016246	0.011654	0.017796	0.000964	0.006921	0.006181	0.021395	0.016379
Brahui	0.001068	0.008661	0.014178	0.012121	0.016955	0.003728	0.004157	0.004315	0.020685	0.015161
Brahui	0.002656	0.008531	0.014816	0.013475	0.016789	0.002838	0.002618	0.003375	0.019536	0.016219
Brahui	0.002237	0.009769	0.015497	0.012635	0.016551	0.004093	0.001261	0	0.019862	0.01651
Brahui	0.001795	0.00951	0.01526	0.013205	0.01743	0.002693	0.001198	0.001332	0.021267	0.018798
Brahui	0.001424	0.009009	0.01561	0.010759	0.016859	0.002883	0.006401	0.005828	0.020707	0.017326
Brahui	0.001395	0.0089	0.014027	0.010015	0.018286	0.001717	0.003934	0.006364	0.024518	0.016642
Brahui	0.001135	0.008675	0.014345	0.010663	0.016854	0.000104	0.006256	0.005722	0.022556	0.016866
Brahui	0.000783	0.005065	0.013695	0.010595	0.015698	0.000333	0.003738	0.004544	0.019673	0.017173
Brahui	0.001792	0.010087	0.015416	0.011502	0.015777	0.000857	0.002249	0.004225	0.02021	0.016908
Brahui	0.000305	0.007773	0.014517	0.012519	0.018176	0.002917	0.003566	0.003496	0.021664	0.015706
Brahui	0.001847	0.00167	0.014715	0.012252	0.016944	0.002257	0.005627	0.000973	0.023724	0.017432
Brahui	0.001149	0.010314	0.015756	0.010843	0.0168	0.003888	0.003383	0.003716	0.022551	0.014511
Brahui	0.000297	0.009274	0.015575	0.005695	0.018661	0.000435	0.003784	0.005046	0.024061	0.014178
Brahui	0	0.008863	0.015185	0.011175	0.017403	0.00137	0.006857	0.003177	0.023203	0.019797
Brahui	0.00068	0.009295	0.015205	0.009912	0.02111	0.001177	0.008578	0.006725	0.023917	0.015521
Makrani	0.002028	0.005187	0.015679	0.012066	0.016412	0.000115	0.005667	0.005054	0.021014	0.017994
Makrani	0.000661	0.007479	0.014862	0.011243	0.017173	0.000995	0.007723	0.005754	0.022045	0.016301
Makrani	0.001354	0.008558	0.016186	0.012627	0.019939	0.002683	0.007607	0.008058	0.026392	0.018719
Makrani	8.2e-05	0.007986	0.014279	0.011213	0.016633	0	0.00555	0.006901	0.021583	0.01674
Makrani	0.001355	0.007633	0.013594	0.011685	0.018054	0.00332	0.007815	0.009011	0.023845	0.017598
Makrani	0.000971	0.007928	0.016391	0.011393	0.016419	0.000439	0.006381	0.002251	0.020639	0.016133
Makrani	0.001556	0.010894	0.016388	0.010827	0.02011	0	0.007341	0.005769	0.023256	0.016865
Makrani	0.001425	0.008695	0.015314	0.006962	0.016251	0.004921	0.008824	0.00767	0.021224	0.017213
Makrani	0.003552	0.00703	0.014564	0.014381	0.01653	0.006413	0.005318	0.003623	0.026302	0.021717
Makrani	0.003964	0.008507	0.014802	0.013271	0.015534	0.006437	0.001463	0.002171	0.022639	0.018968
Makrani	0.00112	0.004227	0.012957	0.012536	0.014291	0.004783	0.001794	0.001846	0.02224	0.017762
Makrani	0.001818	0.008863	0.015351	0.006297	0.012681	0.006208	0.003422	0.006704	0.020101	0.01767
Makrani	0.00551	0.009452	0.017373	0.009879	0.011811	0.007964	0.006667	0.006093	0.022515	0.021333
Makrani	0.004733	0.010142	0.019114	0.008534	0.008712	0.010575	0.005585	0.004235	0.023749	0.021856
Makrani	0.002382	0.008651	0.014301	0.01125	0.006277	0.00745	0.00596	0.006543	0.018298	0.018014
Makrani	0.002292	0.009493	0.016197	0.01171	0.015306	0.004134	0.005355	0.002903	0.023941	0.019711
Makrani	0.000152	0.01044	0.017054	0.008724	0.015389	0.006171	0.008191	0.00748	0.024012	0.019289
Makrani	0.004492	0.006956	0.015565	0.012516	0.007391	0.010508	0.002186	0.005788	0.01718	0.020511
Makrani	0.000784	0.010133	0.015384	0.000567	0.015111	0.001017	0.009489	0.009012	0.020805	0.014246
Makrani	0.002629	0.009569	0.020004	0.005667	0.013566	0.00453	0.005959	0.001284	0.02348	0.017892
Makrani	0	0.010303	0.017471	0.000998	0.01577	0	0.006172	0	0.022741	0.015296
Makrani	0.003417	0.010896	0.017953	0.002965	0.014655	0.005284	0.005926	0.001535	0.021283	0.016407
Makrani	0.003152	0.009573	0.014941	0.010369	0.012882	0.008014	0.006714	0.007077	0.020492	0.020513
Makrani	0.004612	0.009099	0.018041	0.013646	0.011262	0.010202	0.007304	0.007298	0.017376	0.015851
Makrani	0	0.008723	0.017443	0.003356	0.016184	0	0.007575	0.008037	0.021152	0.015416
Hazara	0.004162	0.010483	0.017511	0.004231	0.017249	0.007564	0.007052	0.006994	0.02568	0.018497
Hazara	0.002904	0.010278	0.019617	0.006841	0.016505	0.003958	0.011308	0.009876	0.032685	0.023612
Hazara	0.000432	0.010938	0.016925	0.004353	0.013905	0.000319	0.009736	0.010064	0.019552	0.014424
Hazara	0	0.008731	0.017328	0.008743	0.011151	0	0.009585	0.008981	0.020262	0.016461
Hazara	0.004698	0.008689	0.016105	0.013987	0.014419	0.009172	0.002016	0.002932	0.024267	0.019809
Hazara	0.000968	0.009478	0.016313	0.00389	0.015753	0.001077	0.009359	0.00916	0.021991	0.015317
Hazara	0.003094	0.009244	0.018438	0.005105	0.006839	0.004803	0.005416	0.004559	0.019806	0.017574
Hazara	0.000566	0.008888	0.016941	0.006242	0.014615	0.000785	0.009269	0.008831	0.021949	0.015845
Hazara	0.003547	0.009624	0.016346	0.010316	0.013615	0.005083	0.007943	0.007557	0.021907	0.016323
Hazara	0.002088	0.010749	0.015215	0.006314	0.014247	0.002886	0.008104	0.00751	0.019984	0.015385
Hazara	0.001786	0.009993	0.01729	0.004376	0.01496	0.004163	0.008208	0.005201	0.020589	0.018912
Hazara	0.002508	0.010707	0.017393	0.008646	0.015406	0.001939	0.010018	0.010445	0.031767	0.025586
Hazara	0.000224	0.00863	0.016161	0.001952	0.018352	0.000237	0.013021	0.010571	0.023041	0.015223
Hazara	0.000841	0.009199	0.016454	0.0052	0.016241	0.000623	0.011105	0.009507	0.020589	0.015059
Hazara	0	0.010158	0.01726	0	0.016763	0	0.011306	0.009541	0.022798	0.018051
Hazara	0.00058	0.009722	0.016156	0.000555	0.015685	0.001664	0.012523	0.011111	0.022951	0.016217
Hazara	0.001899	0.008706	0.014968	0.002266	0.015473	0.001139	0.012199	0.011077	0.016559	0.005601
Hazara	0.000286	0.009342	0.017112	0.002347	0.015072	0	0.0082	0.002892	0.020037	0.015699
Hazara	0	0.00712	0.014621	0	0.017712	0	0.011571	0.011386	0.023809	0.013344
Hazara	0.003016	0.009455	0.01537	0.006192	0.015401	0.005041	0.009784	0.00938	0.021158	0.01509
Hazara	0.000128	0.010482	0.018851	0	0.014862	0	0.006784	0.004102	0.023394	0.015193
Hazara	0	0.009247	0.016633	0.002937	0.016366	0	0.010732	0.010243	0.022567	0.015559
Hazara	0.000933	0.010275	0.015065	0.005005	0.018074	0.001199	0.009761	0.008483	0.022677	0.015057
Hazara	0	0.008806	0.018094	0.003103	0.015792	0	0.009801	0.006796	0.02116	0.014438
Kalash	0.000496	0.009964	0.015436	0.000524	0.015276	0	0.008447	0.008138	0.0196	0.014467
Kalash	0	0.009567	0.016543	0.003081	0.016067	0	0.010873	0.009185	0.020313	0.015212
Kalash	0.000387	0.010517	0.017234	0.006993	0.01519	0.000792	0.01309	0.011583	0.023848	0.017786
Kalash	0	0.009779	0.0146	0	0.016531	0	0.010771	0.00736	0.017492	0
Kalash	0	0.01018	0.015916	0.000644	0.016446	0	0.009424	0.009718	0.022811	0.013847
Kalash	0.000939	0.009158	0.016023	0.001175	0.015249	0.002382	0.013217	0.011682	0.021958	0.016157
Kalash	0.000269	0.010518	0.016863	0	0.016138	0	0.010979	0.010319	0.021969	0.014787
Kalash	0	0.010398	0.017027	0	0.013334	0	0.003245	0.002974	0.020584	0.015535
Kalash	0	0.010503	0.016619	0	0.01412	0	0.001662	0.001087	0.019761	0.014751
Kalash	0	0.009166	0.015282	0	0.012273	0	0	0	0.020571	0.015163
Kalash	0	0.009979	0.015939	0	0.012587	0	0	0	0.019383	0.014676
Kalash	0	0.009113	0.014998	0.001007	0.017526	0	0.00769	0.001823	0.019675	0.012017
Kalash	0	0.009091	0.016165	0	0.014194	0	0.00086	0.000572	0.02043	0.016093
Kalash	0	0.009986	0.016373	0	0.015056	0	0.004682	0	0.021061	0.014937
Kalash	0.000268	0.006234	0.01636	0	0.014119	0	0.002038	0.001241	0.02241	0.015246
Kalash	0	0.009715	0.014618	0	0.015159	0	0	3.2e-05	0.019515	0.015912
Kalash	0	0.009036	0.013484	0	0.012632	0	0.003281	0.002514	0.01912	0.013132
Kalash	0	0.010179	0.017038	5.8e-05	0.018511	0	0.004859	0	0.020535	0.010249
Kalash	0	0.009279	0.016353	0	0.016049	0	0.005732	0	0.020383	0.013882
Kalash	0	0.009509	0.016241	0	0.01387	0	0.001285	0.001784	0.018502	0.014979
Kalash	0	0.010089	0.014756	0	0.01491	0	0.0013	0	0.024965	0.01715
Kalash	0	0.008152	0.015064	4.4e-05	0.013638	0	4e-05	0	0.020358	0.015385
Kalash	0	0.009479	0.015604	0	0.013191	0	0.000997	0.000248	0.020083	0.014208
Kalash	0	0.009684	0.014435	0	0.020937	0	0.005937	0.000638	0.021245	0
Kalash	0	0.008644	0.012494	0	0.011845	0	0	0	0.019349	0.01425
Cambodian	0	0.009603	0.014192	0	0.013723	0	0.001819	0	0.019518	0.014187
Cambodian	0	0.010013	0.013696	0	0.013618	0	0	0	0.018079	0
Cambodian	0	0.009397	0.015571	0	0.009154	0	0.000694	0	0.014063	3.2e-05
Cambodian	0	0.009897	0.013778	0	0.015755	0	0.003072	0.000804	0.018248	0.000889
Cambodian	0	0.010157	0.015408	0	0.010376	0	0.003651	0.001689	0.014755	0.000457
Cambodian	0	0.009624	0.017122	0	0.007237	0	0.004908	0.000606	0.014386	0.001112
Cambodian	0	0.009222	0.015095	0	0.015472	0	0.00043	0	0.016509	0
Cambodian	0	0.010118	0.015738	0	0.014343	0	0.00295	0.000675	0.018685	0
Cambodian	0	0.008925	0.015114	0	0.013831	0	0.001906	4e-06	0.015635	0.000638
Cambodian	0	0.00978	0.015502	0	0.015954	0	0.001624	0.001511	0.017469	0
Cambodian	0	0.009839	0.015347	0	0.015671	0	0.001621	0	0.017481	0
North West Chinese	0	0.009389	0.013699	0.000526	0.0038	0	0.000817	0	0.012405	0
North West Chinese	0	0.006964	0.01365	0	0.016772	0	0.006426	0.003211	0.019803	0.010016
North West Chinese	0	0.009344	0.015105	0	0.008289	0	0.000352	0.000193	0.014585	0
North West Chinese	0	0.009134	0.015317	0	0.018046	0	0.005526	0.001558	0.017675	0.000263
North West Chinese	0	0.010244	0.013267	0	0.00344	0	0.000168	0	0.011709	0
North West Chinese	0	0.009636	0.015352	0	0.01453	0	0.001768	0	0.017418	0
North West Chinese	0	0.010452	0.01562	0	0.004145	0	0.000524	0.000315	0.012962	0
North West Chinese	0	0.011583	0.014936	0	0.012599	0	0.006002	0	0.0151	0.000371
North West Chinese	0	0.009326	0.014845	0.000953	0.017733	0	0.00764	0.000457	0.021358	0.000215
North West Chinese	0	0.010367	0.015587	0	0.018898	0	0.005675	0.000284	0.017758	0.000598
North West Chinese	0.002307	0.001527	0	0.020382	0.015405	0.010648	0.002506	0.002215	0.020646	0.017097
North West Chinese	0.001321	0	0	0.019461	0.015557	0.00903	0	0.000201	0.022199	0.017685
North West Chinese	0.003828	0.001703	0	0.01973	0.01425	0.009119	0.000171	0.004303	0.022933	0.020857
North West Chinese	0.006403	0.001725	0.003476	0.017889	0.01287	0.015535	0.00045	0.000585	0.019441	0.015733
North West Chinese	0.002742	4.5e-05	0	0.017987	0.013936	0.008517	0.000838	0.002326	0.02276	0.018621
North West Chinese	0.002601	0.001556	0.002618	0.017626	0.012834	0.012863	0.001852	0.003379	0.017978	0.015331
North West Chinese	0.003674	0.006842	0.002854	0.017182	0.014323	0.010043	0.000573	0	0.021053	0.018772
North West Chinese	0.005704	0.000815	0.003534	0.018158	0.014506	0.01075	0.000668	0.003504	0.02124	0.018633
North West Chinese	0.001926	0.001726	0	0.020135	0.015119	0.012797	0.00071	0.001562	0.021359	0.018477
North West Chinese	1.6e-05	0.00047	0	0.01713	0.015526	0.007774	0.000942	0.002309	0.022096	0.016791
North West Chinese	0.006711	0.00414	0.011254	0.012755	0.00856	0.015004	0.001333	0.002017	0.017358	0.018751
North West Chinese	0.004549	0.006842	0.014379	0.013369	0.012016	0.007459	0.006736	0.004872	0.021906	0.018349
North West Chinese	0.002141	0.010472	0.017506	0.016126	0.017104	0.007558	0.005095	0.005154	0.023143	0.019154
North West Chinese	0.003821	0.009509	0.016412	0.013852	0.015125	0.007327	0.005384	0.004731	0.021247	0.018051
North West Chinese	0.003217	0.005621	0.015409	0.014556	0.014389	0.007414	0.003745	0.003331	0.019676	0.018483
South Chinese	0.003007	0.008731	0.016181	0.013571	0.015397	0.007067	0.004926	0.000285	0.019551	0.017088
South Chinese	0.003045	0.009604	0.017593	0.012484	0.014355	0.006292	0.009153	0.008545	0.018082	0.016849
South Chinese	0.004172	0.009078	0.014743	0.013713	0.014154	0.009087	0.004283	0.001111	0.019552	0.017667
South Chinese	0.001468	0.007641	0.015454	0.014314	0.013184	0.007113	0.00179	0.001204	0.021836	0.016558
South Chinese	0.002874	0.00707	0.015544	0.015569	0.015921	0.008256	0.003854	0.004138	0.023712	0.019072
South Chinese	0.00326	0.009296	0.016856	0.015373	0.012626	0.006982	0.003617	0.000776	0.02169	0.022424
South Chinese	0.003819	0.00595	0.014853	0.012687	0.010541	0.009429	0.00479	0	0.020733	0.01858
South Chinese	0.004419	0.004447	0.016271	0.013864	0.013777	0.007304	0.001866	0.005608	0.02228	0.018813
South Chinese	0.003909	0.006076	0.015388	0.014689	0.014928	0.008406	0.005261	0.001277	0.023918	0.021379
South Chinese	0.004409	0.008755	0.017117	0.011559	0.014709	0.008119	0.005346	0.005708	0.019934	0.019203
South Chinese	0.004064	0.00427	0.013243	0.014195	0.01333	0.007285	0.002862	0.004982	0.021081	0.018209
South Chinese	0.004641	0.008599	0.016361	0.013735	0.011268	0.008767	0.002361	0.005222	0.021245	0.017819
South Chinese	0.003989	0.007897	0.014493	0.013992	0.013556	0.008408	0.001252	0.003775	0.022729	0.017135
South Chinese	0.00298	0.010142	0.01632	0.014638	0.012423	0.007836	0.001555	0.005737	0.024801	0.023158
South Chinese	0.004268	0.009114	0.015648	0.014431	0.013031	0.006238	0.004602	0.003707	0.02169	0.019602
South Chinese	0.003034	0.010864	0.016468	0.012644	0.014591	0.005488	0.003487	0.00079	0.019293	0.017031
South Chinese	0.004181	0.008428	0.016626	0.005721	0.013653	0.008593	0.006063	0.006945	0.022601	0.02126
South Chinese	0.003829	0.00932	0.015593	0.014821	0.015934	0.009612	0.003293	0.004258	0.02391	0.019047
South Chinese	0.004831	0.005069	0.01697	0.011049	0.004336	0.00985	0.007419	0.004949	0.021529	0.023469
South Chinese	0	0.00886	0.014794	0.001054	0.014232	0	0	0	0.021783	0.014928
South Chinese	0.002383	0.008647	0.016663	0.013334	0.0157	0.007462	0.007532	0.005047	0.022073	0.01803
South Chinese	0.004032	0.009435	0.016158	0.013666	0.009052	0.007015	0.00605	0.00465	0.021047	0.021134
South Chinese	0.000665	0.003485	0.010671	0.00386	0.000944	0	0.003506	0.000873	0.019988	0.021906
South Chinese	0.000233	0.006575	0.005558	0.001655	0.002084	0	0.00061	0	0.020668	0.021693
South Chinese	0	0.001914	0.002791	0.000677	0.006482	0	0.000123	0	0.028323	0.027587
Han	0	0.003175	0.005398	0.000922	0	0	0.000453	0.000101	0.023706	0.024683
Han	0.004316	0.006633	0.014123	0.012654	0.004193	0.008289	0.004433	0.0044	0.020201	0.019793
Han	0.002619	0.008787	0.017506	0.006981	0.008797	0.000651	0.000447	0.001897	0.027145	0.028683
Han	0.000977	0.005168	0.007732	2e-05	0.000334	0.000953	0.003278	0.00033	0.022308	0.024026
Han	0.004237	0.009606	0.016992	0.006384	0.012826	0.007746	0.009545	0.009754	0.020787	0.016231
Han	0	0.001494	0.003262	0	0	0	0	0	0.019764	0.019773
Han	0.006239	0	0	0.015036	0	0.010111	0.00134	0.004753	0	0.01413
Han	0.007571	0	0	0.01507	0	0.010925	0.000474	0.002003	0	0.014205
Han	0.006605	0	0	0.014789	0	0.009956	0.000261	0.004323	0	0.014051
Han	0.007052	0.000189	0	0.013005	0	0.010172	0.00018	0.00285	0	0.013163
Han	0.006709	0	0	0.014066	0	0.009518	0.00313	0.005483	0	0.013938
Han	0.006339	0	0	0.013407	0	0.009627	0.00181	0.004144	0	0.014008
Han	0.005453	8.7e-05	0.000531	0.014305	0	0.010517	0.001218	0.004774	0.013894	0.018861
Han	0.006303	0.000225	0	0.0141	0	0.009761	0.002545	0.004752	0.004318	0.012914
Han	0.006321	0	0.003937	0.014393	0	0.01097	0.004889	0.004275	0.013764	0.015309
Han	0.006014	0.000402	0	0.013549	0.000355	0.009468	0.003414	0.004556	0.015806	0.016722
Han	0.006642	0.002706	0	0.014753	0	0.009002	0.001313	0.004318	0.015916	0.018397
Han	0.006627	0.000331	0.001213	0.013931	0	0.00995	0.002874	0.005031	0.012858	0.017181
Han	0.005886	0	0.000698	0.014643	0	0.009654	0.002075	0.004478	0.013733	0.016616
Han	0.006566	0.000196	0.000602	0.015672	0	0.00983	0.000821	0.004432	0.015889	0.01684
Han	0.006534	0.00152	0.001281	0.014459	0	0.010505	0.000486	0.001588	0.011612	0.017098
Han	0.006651	0.002315	0.001301	0.014213	0	0.010224	0.005533	0.005544	0.015224	0.017646
Han	0.005902	0.000433	0	0.015811	0	0.010113	0.002554	0.003398	0.018623	0.019662
Han	0.007263	0.000143	0	0.014364	0	0.009819	0.001549	0.004784	0	0.015444
Han	0.006518	0.000226	0.002407	0.01666	0	0.009891	0.002604	0.004516	0.019836	0.019318
North East Chinese	0.000565	0.00482	0.01513	0.006487	0.014102	0.000836	0.001103	0.004182	0.02272	0.018683
North East Chinese	0.002812	0.002925	0.014293	0.011063	0.010122	0.000829	0.001708	0.001948	0.022181	0.017694
North East Chinese	0	0.008038	0.014054	0.008952	0.011262	0	0.000718	0.00341	0.020174	0.017447
North East Chinese	0.002387	0.007009	0.016112	0.01286	0.011565	0.004481	0.002027	0.000977	0.021133	0.014596
North East Chinese	0.000162	0.00879	0.015847	0.010699	0.01548	0.004868	0.000497	0.000477	0.020981	0.016099
North East Chinese	0.000215	0.008237	0.013786	0.009914	0.010849	0.00048	0.002252	0.001459	0.02149	0.020137
North East Chinese	0.000667	0.008283	0.016193	0.009567	0.013088	0.000369	2.6e-05	0.000187	0.021434	0.018473
North East Chinese	2.8e-05	0.008773	0.014733	0.010037	0.012652	0	0.001768	0.001668	0.019042	0.017612
North East Chinese	0.001065	0.007745	0.013894	0.00495	0.013224	2e-05	0.000371	0.0044	0.022443	0.016427
North East Chinese	0.000398	0.008599	0.01588	0.010549	0.012861	0.000749	0.000835	0.002622	0.020882	0.015796
North East Chinese	0.000459	0.00921	0.017482	0.012225	0.013931	0.002598	0.0045	0.004849	0.02138	0.019086
North East Chinese	0.001043	0.008548	0.013722	0.010315	0.010746	0.003456	0.002432	0.001832	0.021741	0.016691
North East Chinese	0.003367	0.007186	0.014424	0.012821	0.014423	0.005908	0.004108	0.000492	0.02083	0.017799
North East Chinese	0.002742	0.008441	0.015774	0.012252	0.013021	0.006248	0.003211	0.005478	0.021186	0.018113
North East Chinese	0.000688	0.009056	0.014717	0.011738	0.013138	0.000129	0.001277	0	0.020091	0.018344
North East Chinese	0.003676	0.008359	0.013999	0.012917	0.014794	0.006612	0.000903	0.000354	0.023007	0.019794
North East Chinese	0.003253	0.008693	0.015287	0.009966	0.01157	0.003206	0.004728	0.002646	0.021142	0.018413
North East Chinese	0	0.007503	0.013265	0.011689	0.01477	0	0.000211	0.000464	0.020221	0.015931
North East Chinese	0.001131	0.007229	0.014188	0.012587	0.013544	0	0	0.000338	0.020205	0.016892
North East Chinese	0.001063	0.005416	0.014505	0.008202	0.015435	0.000823	0.003981	0.002941	0.021752	0.016134
North East Chinese	0.003929	0.008326	0.015258	0.011585	0.015108	0.005238	0.004468	0.005886	0.021036	0.016126
North East Chinese	0.001358	0.007867	0.014567	0.008229	0.00953	0.004982	0.003286	0.00204	0.019008	0.016778
North East Chinese	0.001696	0.009013	0.016809	0.01196	0.014625	0.004044	0.003062	0	0.022831	0.018162
North East Chinese	0.002392	0.008298	0.014786	0.009836	0.011664	0.006588	0.000902	0.001905	0.023851	0.021381
North East Chinese	0.000637	0.00968	0.014744	0.011953	0.013765	0	0.001386	0.003887	0.020943	0.015913
Japanese	0.000603	0.009704	0.016785	0.01334	0.015647	0.002126	0.00142	0.002318	0.023637	0.01822
Japanese	0.001824	0.008759	0.017275	0.011137	0.012707	0.000549	0.004866	0.005134	0.027636	0.021171
Japanese	0.000315	0.009833	0.016255	0.011992	0.004569	0.00099	0.000805	0.002711	0.020098	0.01902
Japanese	0.002255	0.006528	0.014753	0.011413	0.014739	0.004474	0.004406	0.000877	0.019674	0.015432
Japanese	0.003276	0.004031	0.013406	0.012797	0.011887	0.004344	0.004715	0.005414	0.019489	0.017682
Japanese	0.000417	0.007149	0.015079	0.009392	0.015074	0.00546	0.006381	0.005395	0.021265	0.016523
Japanese	0.000374	0.008177	0.015486	0.008676	0.01306	0.000663	0.004298	0.001163	0.021629	0.018362
Japanese	0.003786	0.009763	0.013486	0.012415	0.013456	0.006194	0.003015	0.003397	0.01888	0.015635
Japanese	0	0.008817	0.014959	0.009845	0.010818	0	0.000877	0.000331	0.023115	0.018966
Japanese	0.001806	0.007463	0.012599	0.012174	0.014755	0.00439	0.004899	0.004386	0.020123	0.015063
Japanese	0.002579	0.008751	0.014667	0.005721	0.00768	0.004617	0	0.000624	0.021695	0.020631
Japanese	0.002854	0.009834	0.014706	0.01208	0.016258	0.002553	0.004525	0.001425	0.020424	0.017124
Japanese	0.001628	0.007381	0.014979	0.008603	0.016042	0.000586	0.002025	0.000158	0.021752	0.017441
Japanese	0.003421	0.00837	0.016599	0.013417	0.015703	0.005018	0.006042	0.002718	0.022119	0.019546
Japanese	0.002002	0.008578	0.015736	0.013383	0.014993	0.006372	0.000893	0.003278	0.023184	0.018437
Japanese	0.001729	0.008339	0.015722	0.013532	0.012031	0.004094	0.003711	0.00436	0.021283	0.019872
Japanese	0.003516	0.009944	0.015638	0.011802	0.014702	0.00474	0.001135	0.002107	0.023647	0.019163
Japanese	8.7e-05	0.005423	0.013021	0.010217	0.013173	0	0.000342	0.000837	0.022634	0.016464
Japanese	0	0.008381	0.015679	0.009525	0.011218	0	0.000414	0.001672	0.019508	0.01835
Japanese	0.000316	0.006775	0.013575	0.007313	0.013571	1e-06	0.001032	0.000762	0.019157	0.016292
Japanese	0.000758	0.009541	0.015541	0.010198	0.01108	0.000373	0.002041	0.000326	0.020733	0.018983
Japanese	0.00198	0.010511	0.018284	0.01238	0.013555	0.001283	0.003743	0.002346	0.021566	0.017633
Japanese	0.000205	0.009029	0.01382	0.010359	0.01264	0	0.000675	0.002089	0.018325	0.017263
Japanese	0.001869	0.009211	0.015077	0.012782	0.014823	0.005808	0.004686	0.002673	0.020214	0.015571
Japanese	0.002017	0.009095	0.016722	0.001743	0.005084	0.003762	0.002145	0.000848	0.018427	0.017878
Yakut	0.0016	0.00671	0.016209	0.015737	0.016865	0.0086	0.005106	0.002322	0.026437	0.022081
Yakut	0.001313	0.009262	0.014923	0.009091	0.014433	0.000524	0	0.000517	0.021738	0.017842
Yakut	0.003275	0.006015	0.016772	0.016099	0.017511	0.006924	0.006362	0.002767	0.028082	0.022542
Yakut	0.000429	0.007621	0.014126	0.012	0.0151	0.004815	0.006714	0.003983	0.020996	0.018657
Yakut	0.000253	0.00831	0.016611	0.011886	0.013115	0.003618	1.6e-05	0.004144	0.02213	0.020738
Yakut	0.003872	0.008573	0.017295	0.010518	0.014401	0.005886	0.005546	0.001928	0.023866	0.016941
Yakut	0.003461	0.010657	0.014721	0.009142	0.01341	0.002871	0.004481	0.002845	0.023819	0.018452
Yakut	0.001065	0.007974	0.013015	0.009109	0.014555	0	0.001881	0.000704	0.020623	0.017374
Yakut	0.001857	0.008534	0.014833	0.011797	0.01481	0.004653	0.003168	0.003399	0.022659	0.015903
Yakut	0	0.00774	0.014413	0.010962	0.013563	0	0	0.000262	0.020203	0.017437
Yakut	0.000703	0.010654	0.01525	0.014365	0.013711	0.006151	0.004334	0.004362	0.022977	0.017641
Yakut	0.004695	0.009856	0.015361	0.014411	0.014924	0.007149	0.004674	0.001535	0.023233	0.017494
Yakut	0.000682	0.007237	0.014442	0.010562	0.007021	0.003467	0.001082	0.001092	0.018597	0.01815
Yakut	0.002312	0.008267	0.017502	0.011228	0.015471	0.002082	0.002839	0.003623	0.021116	0.016429
Yakut	0.001589	0.006874	0.015077	0.007564	0.014228	0.000535	0.002171	0.000452	0.017395	0.013926
Yakut	0.002263	0.006564	0.014419	0.012281	0.015418	0.005734	0.002334	0.000913	0.021708	0.01762
Yakut	0.000303	0.008725	0.015902	0.012056	0.003692	0	0.000287	0.001006	0.01893	0.01871
Yakut	0.004097	0.009343	0.015934	0.010457	0.014084	0.007019	0.007135	0.004667	0.02096	0.01668
Yakut	0.003348	0.008943	0.01526	0.010006	0.016279	0.00543	0.004339	0.002852	0.020206	0.016802
Yakut	0.001657	0.008798	0.014141	0.006909	0.013344	0.000471	8.8e-05	0.002188	0.020975	0.017096
Yakut	0.002332	0.005833	0.015549	0.014986	0.015019	0.007046	0.007104	0.0073	0.024521	0.017561
Yakut	0.003359	0.008131	0.015361	0.01144	0.014943	0.003248	0.006713	0.006245	0.019983	0.017298
Yakut	0.001642	0.008581	0.014464	0.011332	0.014272	0.004931	0.001273	0.004719	0.023535	0.017763
Yakut	0.000339	0.003196	0.013483	0.010384	0.009643	0	0.000558	0.000101	0.02026	0.020477
Yakut	0.001473	0.009186	0.016147	0.013162	0.013698	0.005536	0.002339	0	0.021006	0.018032
