# Supplementary material for: Genome-Wide Diversity in the Levant Reveals Recent Structuring by Culture
Source: PLoS Genet. 2013 Feb 28;9(2):e1003316. doi: 10.1371/journal.pgen.1003316 (PMC3585000; doi:10.1371/journal.pgen.1003316)
Supplement: Text S1 — Description of the ROLLOFF analysis. (PDF) [file pgen.1003316.s010.pdf]

## Text S1 ROLLOFF analysis

### *PCA Analysis, core clusters, and outlier removal*

In order to study the relationship of the Lebanese groups with Europeans and sub-Saharan African populations, we performed PCA [1] with Sardinians, Georgians, Ethiopians and Yoruba [2-4]. We projected the Lebanese samples onto the PCs built using European and sub-Saharan African groups. Figures 1 and 2 show that Lebanese Druze and Christians are homogeneous in their relationship to Europeans and sub-Saharan Africans. The Lebanese Muslims are a very heterogenous group and so we divide these samples into 5 groups based on their position on PC1. In addition, we removed 13 outliers using the outlier removal flag in *smartpca*, part of the EIGENSOFT 3.0 package [1] from Lebanese Druze (n = 6) and Christians (n = 7) as they do not cluster with the bulk of the samples from those groups.

### *ROLLOFF*

In order to estimate the date of the sub-Saharan African ancestry in the Lebanese groups, we performed ROLLOFF [5] analysis using Georgians and Ethiopians as the reference populations. Results are shown in Table 1 and Figure 3. To test that the ROLLOFF analysis is robust to the reference populations used, we ran ROLLOFF using Sardinians and Yoruba as the reference and obtained qualitatively similar results (Table 1 and Figure 4).

**Table 1:** Dates of sub-Saharan admixture in Lebanese groups

| Admixed Group                               | Number of Samples | Estimated date $\pm$ standard error |
|---------------------------------------------|-------------------|-------------------------------------|
| <b>References: Georgians and Ethiopians</b> |                   |                                     |
| Lebanese Christians                         | 336               | $88 \pm 7$                          |
| Lebanese Druze                              | 85                | $46 \pm 5$                          |
| Lebanese Muslims - gr1                      | 7                 | $16 \pm 3$                          |
| Lebanese Muslims - gr2                      | 17                | $15 \pm 3$                          |
| Lebanese Muslims - gr3                      | 91                | $19 \pm 1$                          |
| Lebanese Muslims - gr4                      | 747               | $26 \pm 1$                          |
| Lebanese Muslims - gr5                      | 45                | $55 \pm 8$                          |
| <b>References: Sardinians and Yoruba</b>    |                   |                                     |
| Lebanese Christians                         | 336               | $95 \pm 7$                          |
| Lebanese Druze                              | 85                | $38 \pm 4$                          |
| Lebanese Muslims - gr1                      | 7                 | $14 \pm 2$                          |
| Lebanese Muslims - gr2                      | 17                | $15 \pm 2$                          |
| Lebanese Muslims - gr3                      | 91                | $20 \pm 1$                          |
| Lebanese Muslims - gr4                      | 747               | $26 \pm 1$                          |
| Lebanese Muslims - gr5                      | 45                | $39 \pm 5$                          |

PCA Projection: PCA Sardinians, Georgians, Yoruba and Ethiopians

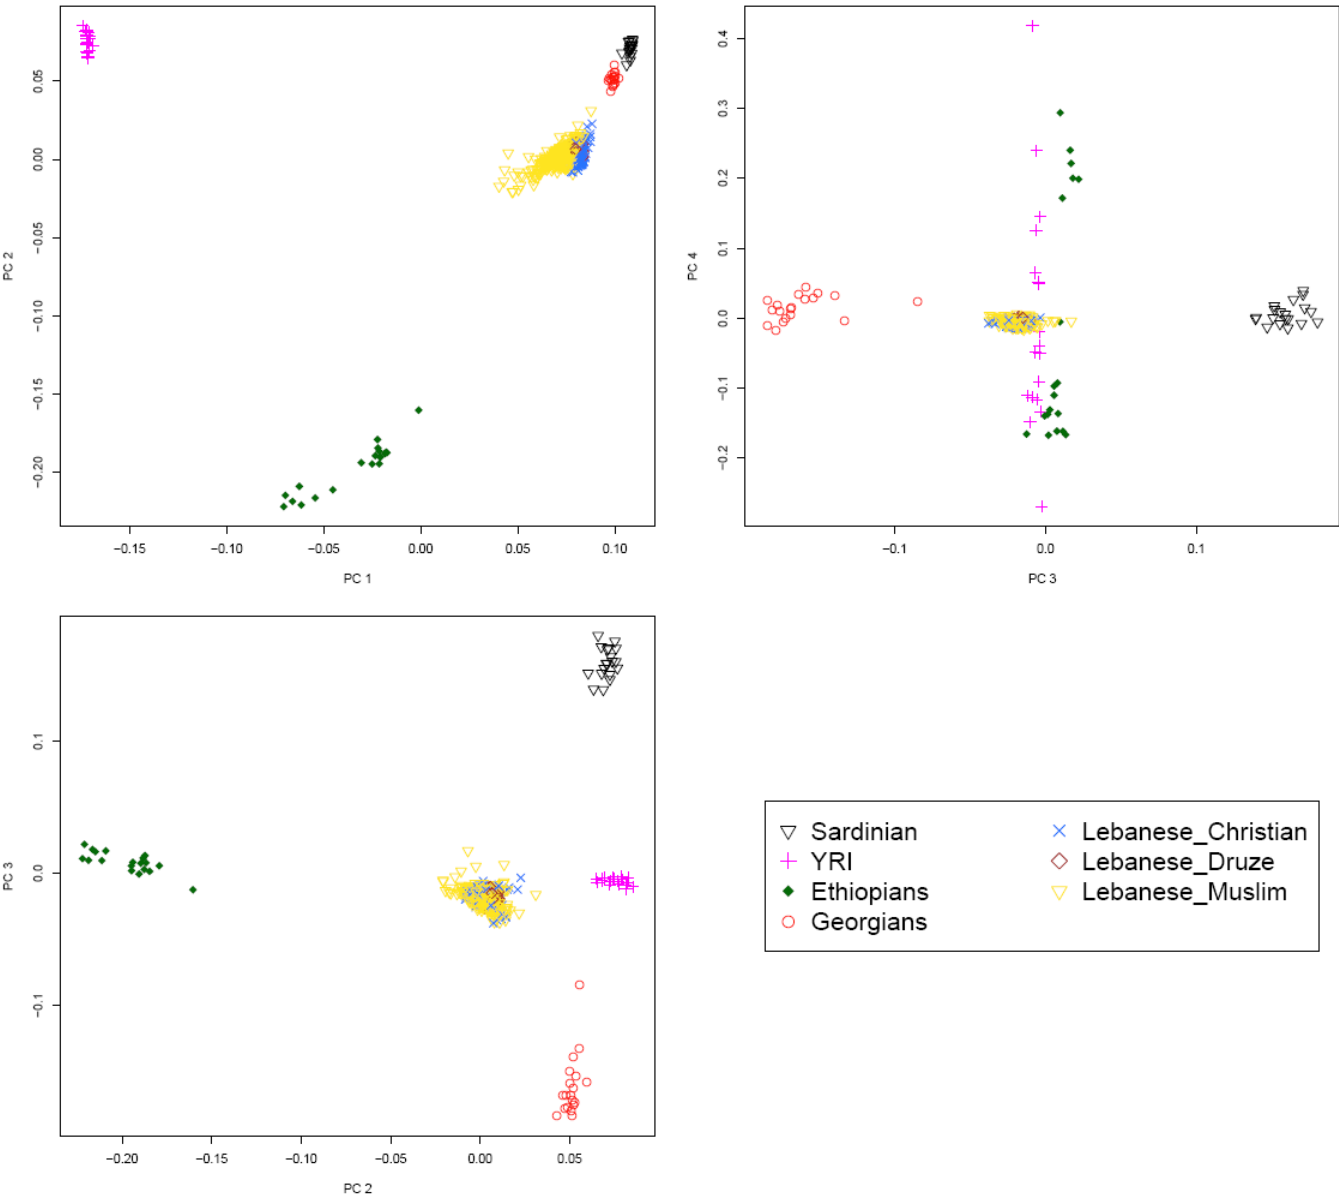

Figure 1: Principal Components Analysis

## PCA Loadings for Lebanese Groups

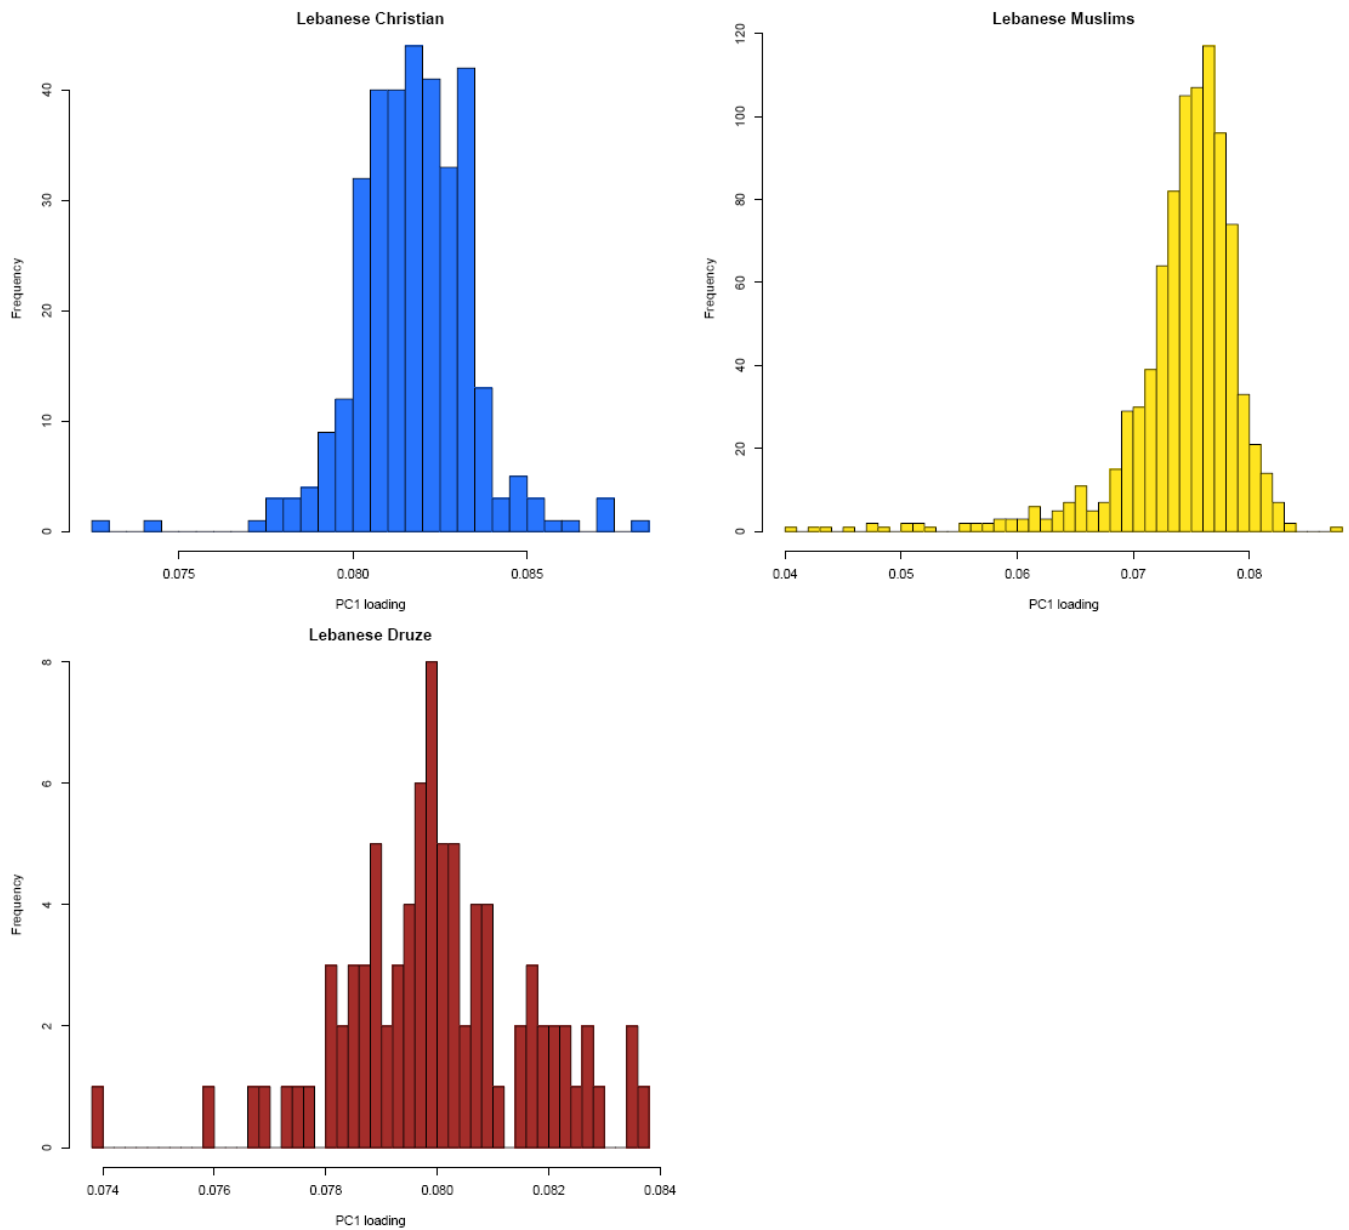

**Figure 2:** Histogram of PC1 loadings from the PCA Projection of Figure 1

### ROLLOFF analysis using Georgians and Ethiopians as references

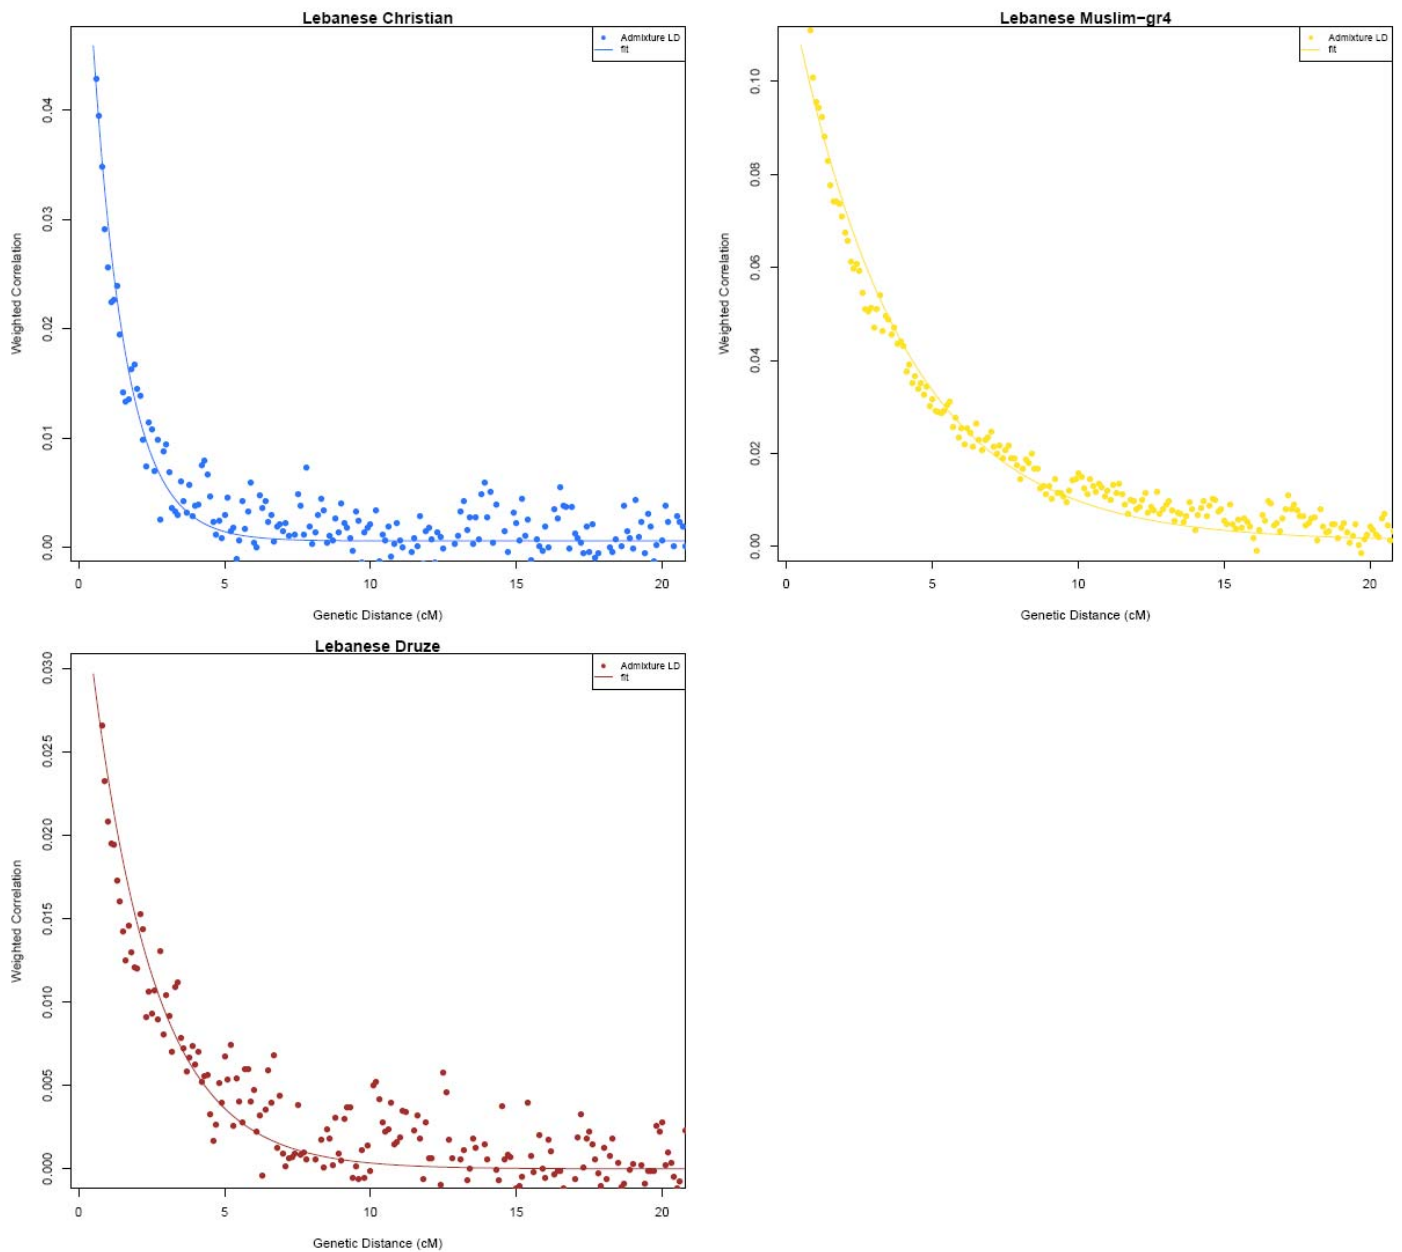

**Figure 3:** We performed ROLLOFF Analysis using Georgians and Ethiopians as the reference populations. The estimated dates of mixture for Lebanese Christian (in blue), Lebanese Druze (in brown) and Lebanese Muslims (group 4 - in gold) are  $88 \pm 7$ ,  $46 \pm 5$  and  $26 \pm 1$  respectively.

## ROLLOFF analysis using Sardinians and Yoruba as references

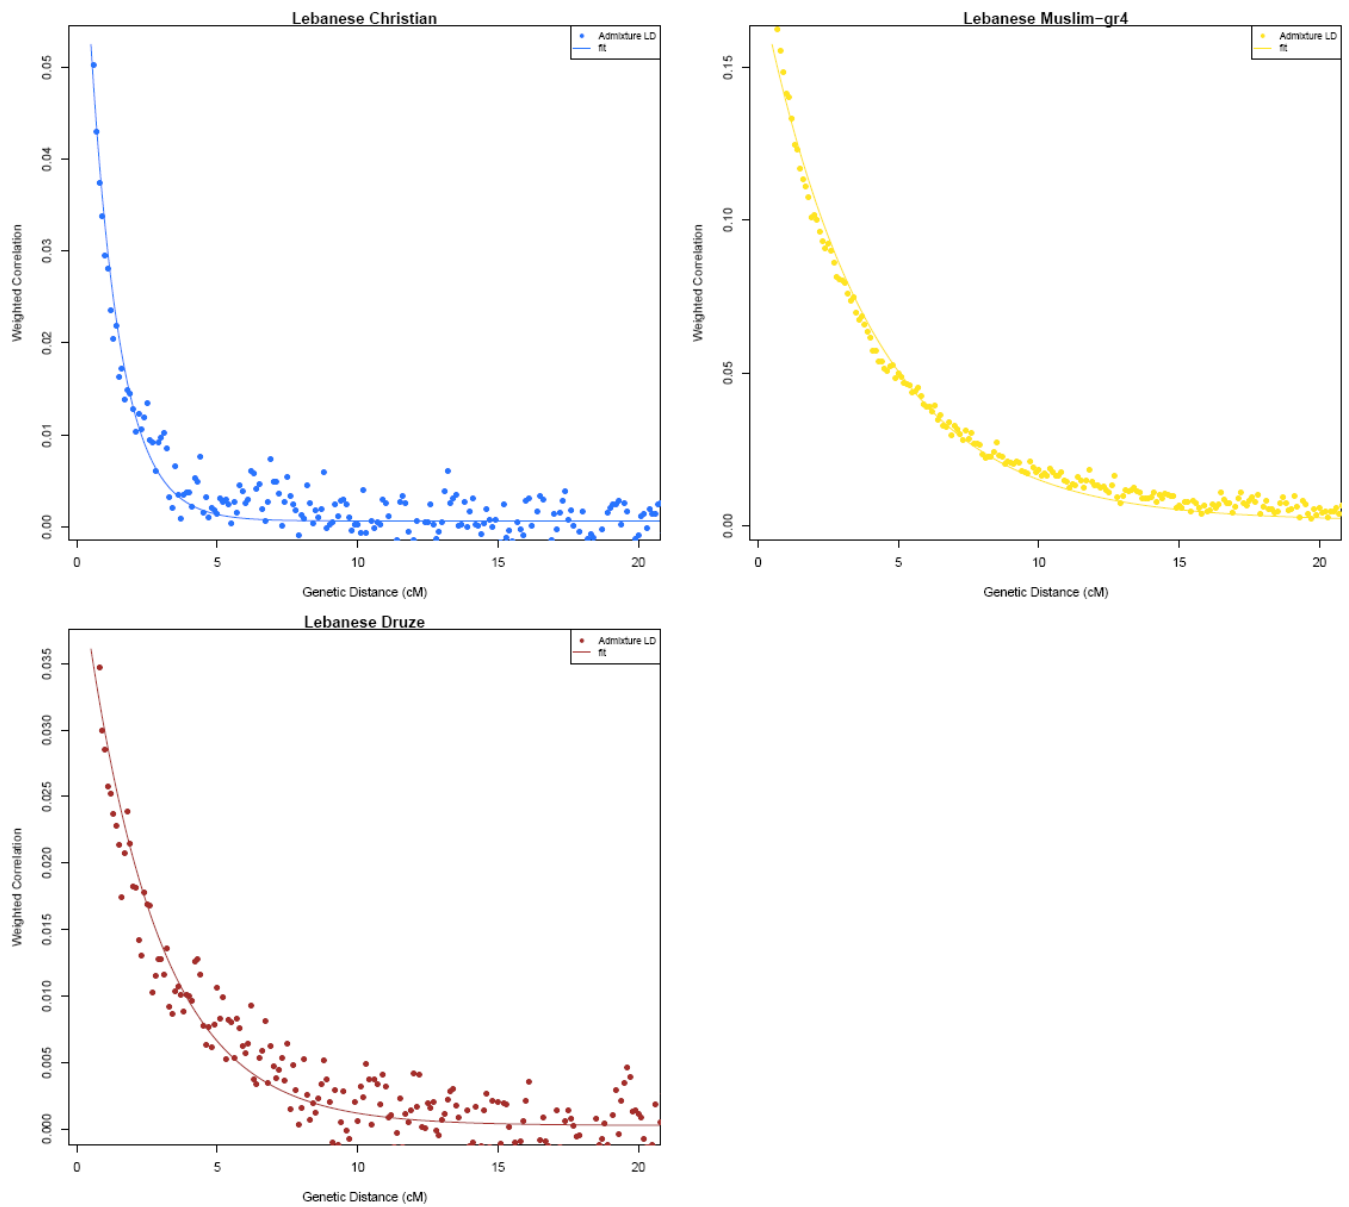

**Figure 4:** We performed ROLLOFF Analysis using Sardinians and Yoruba as the reference populations. The estimated dates of mixture for Lebanese Christian (in blue), Lebanese Druze (in brown) and Lebanese Muslims (group 4 - in gold) are  $95 \pm 7$ ,  $38 \pm 4$  and  $26 \pm 1$  respectively.

## References

1. Patterson N, Price AL, Reich D (2006) Population structure and eigenanalysis. *PLoS Genet* 2: e190.
2. The International HapMap Consortium (2005) A haplotype map of the human genome. *Nature* 437: 1299-1320.
3. Behar DM, Yunusbayev B, Metspalu M, Metspalu E, Rosset S, et al. (2010) The genome-wide structure of the Jewish people. *Nature* 466: 238-242.
4. Li JZ, Absher DM, Tang H, Southwick AM, Casto AM, et al. (2008) Worldwide human relationships inferred from genome-wide patterns of variation. *Science* 319: 1100-1104.
5. Moorjani P, Patterson N, Hirschhorn JN, Keinan A, Hao L, et al. (2011) The history of African gene flow into Southern Europeans, Levantines, and Jews. *PLoS Genet* 7: e1001373.
